# Supplementary material for: Metabarcoding reveals that a non-nutritive sweetener and sucrose yield similar gut microbiota patterns in Wistar rats
Source: PubMed Central journal article supplement (PMC7197999; doi:10.1590/1678-4685-gmb-2019-0028), 2020-03-16
Supplement: 1415-4757-GMB-43-1-e20190028-s2.pdf [file 1415-4757-GMB-43-1-e20190028-s2.pdf]

## Supplementary material to “Metabarcoding reveals that a non-nutritive sweetener and sucrose yield similar gut microbiota patterns in Wistar rats”

**File S1** - Shannon and Simpson indices of diversity. The name of each sheet indicates the respective index.

| <b>File S1 - Shannon index of diversity.</b> |                         |
|----------------------------------------------|-------------------------|
| Sample                                       | Shannon_diversity_index |
| ss10                                         | 3.538667822             |
| sn15                                         | 3.799902343             |
| sn16                                         | 4.340066193             |
| ss19                                         | 3.905047448             |
| sn20                                         | 3.410054225             |
| ss21                                         | 3.773343807             |
| ss25                                         | 3.710766156             |
| sn26                                         | 3.959871778             |
| sn27                                         | 4.055083982             |
| ss28                                         | 3.227322384             |
| ss2                                          | 3.545241855             |
| ss30                                         | 4.573818065             |
| sn31                                         | 4.014366528             |
| sn35                                         | 3.869647747             |
| sn36                                         | 3.803644328             |
| sn5                                          | 4.001957683             |
| ss6                                          | 4.063701449             |
| ss8                                          | 4.278634983             |
| sn9                                          | 4.177561885             |

| <b>File S1 - Simpson index of diversity.</b> |                         |
|----------------------------------------------|-------------------------|
| Sample                                       | Simpson_diversity_index |
| ss10                                         | 0.923476728             |
| sn15                                         | 0.951974565             |
| sn16                                         | 0.969864542             |
| ss19                                         | 0.944695805             |
| sn20                                         | 0.907142672             |
| ss21                                         | 0.937280839             |
| ss25                                         | 0.935652157             |
| sn26                                         | 0.960596451             |
| sn27                                         | 0.954117589             |
| ss28                                         | 0.890961389             |
| ss2                                          | 0.902288008             |
| ss30                                         | 0.97520263              |
| sn31                                         | 0.960698678             |
| sn35                                         | 0.950667893             |
| sn36                                         | 0.94102147              |
| sn5                                          | 0.961838062             |
| ss6                                          | 0.955972074             |
| ss8                                          | 0.971913728             |
| sn9                                          | 0.968464731             |
