# Supplementary material for: Metabarcoding reveals that a non-nutritive sweetener and sucrose yield similar gut microbiota patterns in Wistar rats
Source: PubMed Central journal article supplement (PMC7197999; doi:10.1590/1678-4685-gmb-2019-0028), 2020-03-16
Supplement: 1415-4757-GMB-43-1-e20190028-s3.pdf [file 1415-4757-GMB-43-1-e20190028-s3.pdf]

**Supplementary material to “Metabarcoding reveals that a non-nutritive sweetener and sucrose yield similar gut microbiota patterns in Wistar rats”**

**File S2** - One by One comparison of identified taxa (from Domain to Genus) results. Domain. Wilcoxon signed-rank test.

| Domain      | W value | P-value     | FDR       |
|-------------|---------|-------------|-----------|
| k__Archaea  | 36      | 0.496698348 | 0.4966983 |
| k__Bacteria | 54      | 0.496698348 | 0.4966983 |

**File S2 - One by One comparison of identified taxa (from Domain to Genus) results. Pylum. T test.**

| Phylum            | t value      | p-value     | FDR |
|-------------------|--------------|-------------|-----|
| p__Actinobacteria | 0.393324731  | 0.6995125   | 1   |
| p__Bacteroidetes  | 0.870564995  | 0.399137182 | 1   |
| p__Cyanobacteria  | 0.710381211  | 0.487237874 | 1   |
| p__Elusimicrobia  | 0.555856511  | 0.585581898 | 1   |
| p__Euryarchaeota  | 0.47079656   | 0.645104591 | 1   |
| p__Firmicutes     | 0.535536083  | 0.600671157 | 1   |
| p__Proteobacteria | 0.975918004  | 0.347487875 | 1   |
| p__Spirochaetes   | -0.279808357 | 0.783041979 | 1   |
| p__Tenericutes    | 0.502372295  | 0.622113678 | 1   |

**File S2** - One by One comparison of identified taxa (from Domain to Genus) results. Phylum. Wilcoxon signed-rank test.

| Phylum             | W value | p-value     | FDR       |
|--------------------|---------|-------------|-----------|
| p__Deferribacteres | 43      | 0.904825824 | 1         |
| p__Fibrobacteres   | 48      | 0.842105263 | 1         |
| p__Fusobacteria    | 73      | 0.022018229 | 0.3522917 |
| p__Lentisphaerae   | 46      | 0.968239191 | 1         |
| p__TM7             | 45      | 1           | 1         |
| p__Verrucomicrobia | 21      | 0.053475936 | 0.4278075 |
| p__WPS-2           | 47      | 0.904825824 | 1         |

**File S2** - One by One comparison of identified taxa (from Domain to Genus) results. Class. T test.

| Class                    | t value      | p-value     | FDR       |
|--------------------------|--------------|-------------|-----------|
| c__4C0d-2                | 0.48246616   | 0.635637431 | 0.9684211 |
| c__Alphaproteobacteria   | 1.626967845  | 0.122854596 | 0.899305  |
| c__Bacilli               | -0.331900315 | 0.744021946 | 0.9684211 |
| c__Bacteroidia           | 0.694425083  | 0.49852263  | 0.9684211 |
| c__Betaproteobacteria    | 0.905656981  | 0.381354273 | 0.9684211 |
| c__Clostridia            | 0.685592807  | 0.504518451 | 0.9684211 |
| c__Deltaproteobacteria   | 0.701505489  | 0.49260911  | 0.9684211 |
| c__Elusimicrobia         | 0.227214693  | 0.823314401 | 0.9684211 |
| c__Epsilonproteobacteria | -0.355029539 | 0.72701749  | 0.9684211 |
| c__Erysipelotrichi       | 1.00302387   | 0.33143404  | 0.9684211 |
| c__Methanobacteria       | 1.670899969  | 0.113192528 | 0.899305  |
| c__Mollicutes            | 0.137629392  | 0.892150734 | 0.9725558 |
| c__Spirochaetes          | -0.811924689 | 0.428071943 | 0.9684211 |
| c__Thermoplasmata        | -0.088810774 | 0.930270771 | 0.9725558 |

**File S2** - One by One comparison of identified taxa (from Domain to Genus) results. Class. Wilcoxon signed-rank test.

| Class                  | W value | p-value     | FDR       |
|------------------------|---------|-------------|-----------|
| c__[Lentisphaeria]     | 39      | 0.660720085 | 0.9684211 |
| c__Actinobacteria      | 49      | 0.780185759 | 0.9684211 |
| c__Coriobacteriia      | 48      | 0.842105263 | 0.9684211 |
| c__Deferribacteres     | 38      | 0.603780121 | 0.9684211 |
| c__Fibrobacteria       | 49      | 0.780185759 | 0.9684211 |
| c__Fusobacteriia       | 69      | 0.053475936 | 0.899305  |
| c__Gammaproteobacteria | 59      | 0.277511962 | 0.968421  |
| c__TM7-3               | 45      | 1           | 1         |
| c__Verruco-5           | 27      | 0.156400875 | 0.899305  |

**File S2** - One by One comparison of identified taxa (from Domain to Genus) results. Order. T test.

| Order                 | t value      | p-value     | FDR |
|-----------------------|--------------|-------------|-----|
| o__Burkholderiales    | 0.352714557  | 0.729105749 | 1   |
| o__Campylobacterales  | -0.790538091 | 0.440195517 | 1   |
| o__Clostridiales      | -0.040145729 | 0.968444785 | 1   |
| o__Desulfovibrionales | 0.034738667  | 0.97269503  | 1   |
| o__E2                 | -0.732002    | 0.474914383 | 1   |
| o__Elusimicrobiales   | -0.249680143 | 0.806479648 | 1   |
| o__Erysipelotrichales | 0.408323809  | 0.688222539 | 1   |
| o__Lactobacillales    | -0.479530708 | 0.638500445 | 1   |
| o__RF32               | 0.855817077  | 0.404168322 | 1   |
| o__RF39               | -0.401272345 | 0.694428807 | 1   |
| o__Spirochaetales     | -1.079514607 | 0.295958686 | 1   |
| o__YS2                | -0.017518661 | 0.986240281 | 1   |

**File S2** - One by One comparison of identified taxa (from Domain to Genus) results. Order. Wilcoxon signed-rank test.

| Order                 | W value | p-value     | FDR |
|-----------------------|---------|-------------|-----|
| o__Actinomycetales    | 44      | 0.968239191 | 1   |
| o__Aeromonadales      | 57      | 0.356232003 | 1   |
| o__Bacillales         | 56      | 0.400181861 | 1   |
| o__Bacteroidales      | 44      | 0.968239191 | 1   |
| o__Bifidobacteriales  | 45      | 1           | 1   |
| o__Coriobacteriales   | 44      | 0.968239191 | 1   |
| o__CW040              | 43      | 0.904825824 | 1   |
| o__Deferribacterales  | 37      | 0.548961874 | 1   |
| o__Enterobacteriales  | 47      | 0.904825824 | 1   |
| o__Fibrobacterales    | 45      | 1           | 1   |
| o__Fusobacteriales    | 64      | 0.133300136 | 1   |
| o__Gemellales         | 41      | 0.780185759 | 1   |
| o__M2PT2-76           | 29      | 0.21102427  | 1   |
| o__Methanobacteriales | 56      | 0.400181861 | 1   |
| o__Pasteurellales     | 43      | 0.904825824 | 1   |
| o__Rickettsiales      | 67      | 0.078893243 | 1   |
| o__Turicibacterales   | 51      | 0.660720085 | 1   |
| o__Victivallales      | 35      | 0.446967893 | 1   |
| o__WCHB1-41           | 22      | 0.065253632 | 1   |

**File S2** - One by One comparison of identified taxa (from Domain to Genus) results. Family. T test.

| Family                        | t value      | p-value     | FDR |
|-------------------------------|--------------|-------------|-----|
| f__[Methanomassiliicoccaceae] | -1.055730809 | 0.305873743 | 1   |
| f__[Mogibacteriaceae]         | -0.759577043 | 0.458028243 | 1   |
| f__[Odoribacteraceae]         | -0.517938102 | 0.611263458 | 1   |
| f__[Paraprevotellaceae]       | -0.212112836 | 0.834617762 | 1   |
| f__Alcaligenaceae             | 0.327335068  | 0.748113948 | 1   |
| f__Bacteroidaceae             | -0.689862717 | 0.500286075 | 1   |
| f__Clostridiaceae             | -0.751614613 | 0.463818707 | 1   |
| f__Desulfovibrionaceae        | -0.057218338 | 0.95503844  | 1   |
| f__Elusimicrobiaceae          | -0.384404184 | 0.706912037 | 1   |
| f__Erysipelotrichaceae        | 0.38842546   | 0.702976358 | 1   |
| f__Helicobacteraceae          | -1.017632937 | 0.323124231 | 1   |
| f__Lachnospiraceae            | -0.236307829 | 0.816054494 | 1   |
| f__Lactobacillaceae           | -0.633878904 | 0.536062989 | 1   |
| f__Methanobacteriaceae        | 0.476780807  | 0.641410106 | 1   |
| f__Peptococcaceae             | 0.456252589  | 0.654204024 | 1   |
| f__Porphyromonadaceae         | -0.393202804 | 0.699068963 | 1   |
| f__Prevotellaceae             | -0.012150808 | 0.990448923 | 1   |
| f__Rikenellaceae              | -0.131743352 | 0.896922452 | 1   |
| f__Ruminococcaceae            | -0.073447181 | 0.942308307 | 1   |
| f__Spirochaetaceae            | -1.250560839 | 0.228500465 | 1   |
| f__Streptococcaceae           | 0.149741695  | 0.882984731 | 1   |
| f__Veillonellaceae            | -0.329176903 | 0.746325616 | 1   |

**File S2** - One by One comparison of identified taxa (from Domain to Genus) results. Family. Wilcoxon signed-rank test.

| Family                   | W value | p-value     | FDR |
|--------------------------|---------|-------------|-----|
| f__[Tissierellaceae]     | 51      | 0.660720085 | 1   |
| f__Actinomycetaceae      | 70      | 0.043473554 | 1   |
| f__Aerococcaceae         | 68      | 0.065253632 | 1   |
| f__Bifidobacteriaceae    | 45      | 1           | 1   |
| f__Christensenellaceae   | 40      | 0.719695166 | 1   |
| f__Comamonadaceae        | 53      | 0.548961874 | 1   |
| f__Coriobacteriaceae     | 45      | 1           | 1   |
| f__Deferribacteraceae    | 37      | 0.548961874 | 1   |
| f__Dehalobacteriaceae    | 31      | 0.277511962 | 1   |
| f__Enterobacteriaceae    | 48      | 0.842105263 | 1   |
| f__Eubacteriaceae        | 45      | 1           | 1   |
| f__F16                   | 44      | 0.968239191 | 1   |
| f__Fibrobacteraceae      | 45      | 1           | 1   |
| f__Fusobacteriaceae      | 66      | 0.094719522 | 1   |
| f__Gemellaceae           | 42      | 0.842105263 | 1   |
| f__Micrococcaceae        | 34      | 0.400181861 | 1   |
| f__mitochondria          | 56      | 0.400181861 | 1   |
| f__p-2534-18B5           | 46      | 0.968239191 | 1   |
| f__Pasteurellaceae       | 46      | 0.968239191 | 1   |
| f__Peptostreptococcaceae | 36      | 0.496698348 | 1   |
| f__RF16                  | 36      | 0.496698348 | 1   |
| f__RFP12                 | 22      | 0.065253632 | 1   |
| f__S24-7                 | 46      | 0.968239191 | 1   |
| f__Staphylococcaceae     | 53      | 0.548961874 | 1   |
| f__Succinivibrionaceae   | 57      | 0.356232003 | 1   |
| f__Turicibacteraceae     | 48      | 0.842105263 | 1   |
| f__Victivallaceae        | 35      | 0.446967893 | 1   |

**File S2** - One by One comparison of identified taxa (from Domain to Genus) results. Genus. T test.

| Genus              | t value      | p-value     | FDR       |
|--------------------|--------------|-------------|-----------|
| g__[Prevotella]    | 0.70399012   | 0.491645959 | 0.9682392 |
| g__Allobaculum     | 0.200931977  | 0.843512948 | 0.9682392 |
| g__Bacteroides     | -0.696798624 | 0.49557718  | 0.9682392 |
| g__Blautia         | -0.63304706  | 0.538328282 | 0.9682392 |
| g__Clostridium     | 1.249903546  | 0.22961     | 0.9682392 |
| g__Coprococcus     | -0.154580666 | 0.87903137  | 0.9682392 |
| g__Desulfovibrio   | -0.126196301 | 0.90106089  | 0.9682392 |
| g__Dorea           | -0.240558426 | 0.81279291  | 0.9682392 |
| g__Lactobacillus   | -0.640402696 | 0.533127185 | 0.9682392 |
| g__Oscillospira    | -0.08333813  | 0.934561034 | 0.9682392 |
| g__p-75-a5         | 0.728673532  | 0.477570499 | 0.9682392 |
| g__Parabacteroides | -0.298911673 | 0.768630971 | 0.9682392 |
| g__Prevotella      | 0.218167694  | 0.829914469 | 0.9682392 |
| g__rc4-4           | 1.27222699   | 0.220421465 | 0.9682392 |
| g__Ruminococcus    | -0.463793337 | 0.648729798 | 0.9682392 |
| g__Streptococcus   | 0.339776979  | 0.739654373 | 0.9682392 |
| g__Sutterella      | 0.569768206  | 0.576355444 | 0.9682392 |
| g__Treponema       | -1.167595573 | 0.259311687 | 0.9682392 |
| g__vadinCA11       | -0.802979226 | 0.433583955 | 0.9682392 |
| g__YRC22           | -0.070865961 | 0.944359496 | 0.9682392 |

**File S2** - One by One comparison of identified taxa (from Domain to Genus) results. Genus. Wilcoxon signed-rank test.

| Genus                     | W value | p-value     | FDR       |
|---------------------------|---------|-------------|-----------|
| g__[Eubacterium]          | 49      | 0.780185759 | 0.9682392 |
| g__[Ruminococcus]         | 41      | 0.780185759 | 0.9682392 |
| g__Actinomyces            | 62      | 0.182316136 | 0.9682392 |
| g__Adlercreutzia          | 35      | 0.446967893 | 0.9682392 |
| g__Aggregatibacter        | 44      | 0.968239191 | 0.9682392 |
| g__Anaerobiospirillum     | 52      | 0.603780121 | 0.9682392 |
| g__Anaerococcus           | 48      | 0.842105263 | 0.9682392 |
| g__Anaerofustis           | 43      | 0.904825824 | 0.9682392 |
| g__Anaerostipes           | 32      | 0.31537812  | 0.9682392 |
| g__Bifidobacterium        | 42      | 0.842105263 | 0.9682392 |
| g__Butyricicoccus         | 27      | 0.156400875 | 0.9682392 |
| g__Butyricimonas          | 30      | 0.242806729 | 0.9682392 |
| g__Candidatus Arthromitus | 51      | 0.660720085 | 0.9682392 |
| g__CF231                  | 26      | 0.133300136 | 0.9682392 |
| g__Collinsella            | 33      | 0.356232003 | 0.9682392 |
| g__Coprobacillus          | 52      | 0.603780121 | 0.9682392 |
| g__Dehalobacterium        | 24      | 0.094719522 | 0.9682392 |
| g__Elusimicrobium         | 27      | 0.156400875 | 0.9682392 |
| g__Escherichia            | 56      | 0.400181861 | 0.9682392 |
| g__Facklamia              | 62      | 0.182316136 | 0.9682392 |
| g__Faecalibacterium       | 57      | 0.356232003 | 0.9682392 |
| g__Fibrobacter            | 46      | 0.968239191 | 0.9682392 |
| g__Flexispira             | 27      | 0.156400875 | 0.9682392 |
| g__Lachnospira            | 54      | 0.496698348 | 0.9682392 |
| g__Methanobrevibacter     | 53      | 0.548961874 | 0.9682392 |
| g__Methanosphaera         | 48      | 0.842105263 | 0.9682392 |
| g__Mogibacterium          | 38      | 0.603780121 | 0.9682392 |
| g__Mucispirillum          | 38      | 0.603780121 | 0.9682392 |
| g__Odoribacter            | 35      | 0.446967893 | 0.9682392 |
| g__Oribacterium           | 58      | 0.31537812  | 0.9682392 |
| g__Paraprevotella         | 48      | 0.842105263 | 0.9682392 |
| g__Peptostreptococcus     | 37      | 0.548961874 | 0.9682392 |
| g__Phascolarctobacterium  | 44      | 0.968239191 | 0.9682392 |
| g__RFN20                  | 58      | 0.31537812  | 0.9682392 |
| g__Roseburia              | 47      | 0.904825824 | 0.9682392 |

**File S2** - One by One comparison of identified taxa (from Domain to Genus) results. Genus.  
Wilcoxon signed-rank test.

| Genus             | W value | p-value     | FDR       |
|-------------------|---------|-------------|-----------|
| g__Rothia         | 39      | 0.660720085 | 0.9682392 |
| g__Staphylococcus | 52      | 0.603780121 | 0.9682392 |
| g__Turicibacter   | 42      | 0.842105263 | 0.9682392 |
| g__Veillonella    | 53      | 0.548961874 | 0.9682392 |
| g__Victivallis    | 31      | 0.277511962 | 0.9682392 |
