# Supplementary material for: Metabarcoding reveals that a non-nutritive sweetener and sucrose yield similar gut microbiota patterns in Wistar rats
Source: PubMed Central journal article supplement (PMC7197999; doi:10.1590/1678-4685-gmb-2019-0028), 2020-03-16
Supplement: 1415-4757-GMB-43-1-e20190028-s4.pdf [file 1415-4757-GMB-43-1-e20190028-s4.pdf]

## Supplementary material to “Metabarcoding reveals that a non-nutritive sweetener and sucrose yield similar gut microbiota patterns in Wistar rats”

**Table S1** - Operational Taxonomic Unit (OTU) table. “sn” are the samples that belong to the non-nutritive sweetener (NNS) group; “ss” are the samples that belong to the sucrose (SUC) group. The numbers indicate the number of the rat in the box for internal annotation. Levels 1 to 7: from Domain to the species epithet.

| Level 1    | Level 2         | Level 3       | Level 4         | Level 5                | Level 6         | Level 7      | ss1<br>0      | sn<br>15 | sn<br>16 | ss<br>19 | sn<br>20      | ss<br>21 | ss<br>25 | sn<br>26 | sn<br>27 | ss2<br>8      | ss2      | ss<br>30 | sn<br>31 | sn<br>35 | sn<br>36 | sn<br>5  | ss<br>6  | ss<br>8  | sn<br>9  |
|------------|-----------------|---------------|-----------------|------------------------|-----------------|--------------|---------------|----------|----------|----------|---------------|----------|----------|----------|----------|---------------|----------|----------|----------|----------|----------|----------|----------|----------|----------|
| k_Bacteria | p_Bacteroidetes | c_Bacteroidia | o_Bacteroidales | f_Prevotellaceae       | g_Prevotellae   | s_copri      | 39<br>92      | 79<br>1  | 42<br>1  | 60<br>9  | 15<br>86      | 27<br>20 | 21<br>54 | 43<br>28 | 25<br>54 | 43<br>75      | 70<br>2  | 59<br>6  | 10<br>17 | 1        | 35<br>6  | 13<br>31 | 42<br>14 | 14<br>36 | 64<br>0  |
| k_Bacteria | p_Bacteroidetes | c_Bacteroidia | o_Bacteroidales | f_Prevotellaceae       | g_Prevotellae   | s_copri      | 11<br>10<br>6 | 37<br>91 | 27<br>08 | 94<br>40 | 12<br>85<br>1 | 91<br>32 | 98<br>0  | 31<br>54 | 44<br>84 | 15<br>53<br>3 | 30<br>44 | 19<br>56 | 25<br>92 | 14<br>65 | 79<br>54 | 22<br>34 | 10<br>96 | 12<br>70 | 10<br>86 |
| k_Bacteria | p_Bacteroidetes | c_Bacteroidia | o_Bacteroidales | f_[Paraprevotellaceae] | g_CF231         | Unclassified | 30<br>52      | 32<br>78 | 11<br>00 | 13<br>59 | 13<br>32      | 92<br>6  | 19<br>31 | 24<br>7  | 13<br>81 | 14<br>69      | 18<br>42 | 24<br>19 | 20<br>16 | 27       | 10<br>4  | 14<br>35 | 25<br>86 | 28<br>19 | 66<br>2  |
| k_Bacteria | p_Bacteroidetes | c_Bacteroidia | o_Bacteroidales | f_[Paraprevotellaceae] | g_[Prevotellae] | Unclassified | 16<br>46      | 61       | 12<br>8  | 0        | 10<br>42      | 3        | 56<br>1  | 0        | 78<br>5  | 22<br>3       | 11<br>0  | 24       | 22<br>3  | 0        | 45       | 17<br>6  | 0        | 6        | 13       |
| k_Bacteria | p_Bacteroidetes | c_Bacteroidia | o_Bacteroidales | f_Prevotellaceae       | g_Prevotellae   | Unclassified | 54<br>65      | 44<br>54 | 33<br>18 | 37<br>19 | 13<br>25      | 33<br>45 | 25<br>77 | 19<br>73 | 59<br>39 | 21<br>35      | 32<br>71 | 46<br>77 | 31<br>81 | 29<br>13 | 61<br>61 | 45<br>42 | 39<br>47 | 33<br>89 | 33<br>43 |
| k_Bacteria | p_Bacteroidetes | c_Bacteroidia | o_Bacteroidales | f_Prevotellaceae       | g_Prevotellae   | s_copri      | 16<br>29      | 12<br>67 | 40<br>1  | 33<br>7  | 29<br>57      | 55<br>5  | 41<br>0  | 10<br>53 | 12<br>01 | 17<br>7       | 22<br>4  | 50<br>9  | 59<br>3  | 19       | 31<br>2  | 13<br>52 | 27<br>2  | 7        | 11<br>46 |
| k_Bacteria | p_Bacteroidetes | c_Bacteroidia | o_Bacteroidales | f_Bacteroidaceae       | g_Bacteroides   | Unclassified | 17<br>6       | 21<br>9  | 29       | 19<br>5  | 82            | 10<br>9  | 20       | 29<br>2  | 99       | 66            | 10<br>8  | 42<br>4  | 15<br>1  | 71<br>8  | 31<br>7  | 14<br>9  | 27<br>8  | 17<br>64 | 64<br>3  |
| k_Bacteria | p_Bacteroidetes | c_Bacteroidia | o_Bacteroidales | f_Prevotellaceae       | g_Prevotellae   | s_stercora   | 32<br>58      | 14<br>95 | 27<br>3  | 0        | 0             | 46<br>04 | 0        | 1        | 78<br>2  | 2             | 18<br>4  | 18<br>7  | 77<br>5  | 14<br>48 | 37<br>53 | 45<br>9  | 65<br>7  | 16<br>10 | 58<br>6  |
| k_Bacteria | p_Bacteroidetes | c_Bacteroidia | o_Bacteroidales | Unclassified           | Unclassified    | Unclassified | 47            | 0        | 0        | 0        | 21            | 0        | 0        | 0        | 20       | 25            | 0        | 13       | 4        | 0        | 3        | 5        | 0        | 0        | 0        |
| k_Bacteria | p_Bacteroidetes | c_Bacteroidia | o_Bacteroidales | f_S24-7                | Unclassified    | Unclassified | 26<br>0       | 57       | 65       | 0        | 4             | 0        | 44       | 0        | 19<br>7  | 0             | 13<br>5  | 74       | 60       | 0        | 0        | 68       | 0        | 16<br>2  | 62       |
| k_Bacteria | p_Firmicutes    | c_Clostridia  | o_Clostridiales | Unclassified           | Unclassified    | Unclassified | 45<br>4       | 40<br>6  | 13<br>7  | 37<br>19 | 15<br>59      | 24<br>3  | 1        | 42<br>8  | 76<br>3  | 11            | 46<br>6  | 51<br>0  | 62       | 10<br>1  | 23<br>8  | 43<br>8  | 63<br>0  | 92<br>0  | 36<br>0  |

| Level_1    | Level_2         | Level_3        | Level_4           | Level_5                | Level_6                | Level_7      | ss10 | sn15 | sn16 | ss19 | sn20 | ss21 | ss25 | sn26 | sn27 | ss28 | ss2   | ss30 | sn31 | sn35 | sn36 | sn5  | ss6  | ss8  | sn9  |
|------------|-----------------|----------------|-------------------|------------------------|------------------------|--------------|------|------|------|------|------|------|------|------|------|------|-------|------|------|------|------|------|------|------|------|
| k_Bacteria | p_Firmicutes    | c_Clostridia   | o_Clostridiales   | f_Veillonellaceae      | g_Phascolartobacterium | Unclassified | 644  | 88   | 22   | 0    | 173  | 1295 | 13   | 36   | 175  | 172  | 170   | 30   | 36   | 35   | 49   | 375  | 0    | 1158 | 1526 |
| k_Bacteria | p_Bacteroidetes | c_Bacteroidia  | o_Bacteroidales   | f_Prevotellaceae       | g_Prevotella           | Unclassified | 1904 | 275  | 36   | 848  | 1833 | 141  | 78   | 1261 | 84   | 0    | 666   | 170  | 439  | 365  | 992  | 264  | 881  | 664  | 433  |
| k_Bacteria | p_Firmicutes    | c_Bacilli      | o_Lactobacillales | f_Lactobacillaceae     | g_Lactobacillus        | Unclassified | 1715 | 265  | 133  | 60   | 855  | 347  | 6766 | 1584 | 724  | 2582 | 11297 | 187  | 379  | 5648 | 237  | 2489 | 2470 | 266  | 750  |
| k_Bacteria | p_Bacteroidetes | c_Bacteroidia  | o_Bacteroidales   | f_Prevotellaceae       | g_Prevotella           | Unclassified | 677  | 825  | 2194 | 34   | 581  | 2292 | 496  | 1536 | 1991 | 100  | 344   | 402  | 1571 | 6062 | 2072 | 749  | 413  | 2743 | 2455 |
| k_Bacteria | p_Bacteroidetes | c_Bacteroidia  | o_Bacteroidales   | f_Prevotellaceae       | g_Prevotella           | Unclassified | 938  | 1300 | 579  | 384  | 1048 | 2077 | 1313 | 1102 | 1006 | 3119 | 1314  | 1721 | 1349 | 1960 | 2512 | 2140 | 1536 | 1846 | 2329 |
| k_Bacteria | p_Bacteroidetes | c_Bacteroidia  | o_Bacteroidales   | f_Prevotellaceae       | g_Prevotella           | Unclassified | 2    | 1    | 0    | 1    | 1    | 0    | 1    | 2    | 2    | 0    | 1     | 1    | 1    | 0    | 3    | 2    | 0    | 4    | 3    |
| k_Bacteria | p_Bacteroidetes | c_Bacteroidia  | o_Bacteroidales   | f_Prevotellaceae       | g_Prevotella           | Unclassified | 1961 | 1798 | 760  | 1145 | 5802 | 1760 | 6517 | 3873 | 5536 | 3412 | 937   | 3076 | 3164 | 6057 | 2948 | 2018 | 5918 | 3673 | 2206 |
| k_Bacteria | p_Bacteroidetes | c_Bacteroidia  | o_Bacteroidales   | f_S24-7                | Unclassified           | Unclassified | 99   | 61   | 64   | 219  | 34   | 32   | 97   | 122  | 191  | 78   | 68    | 43   | 60   | 115  | 194  | 53   | 126  | 323  | 119  |
| k_Bacteria | p_Firmicutes    | c_Bacilli      | o_Lactobacillales | f_Lactobacillaceae     | g_Lactobacillus        | Unclassified | 122  | 13   | 2    | 22   | 4    | 19   | 13   | 9    | 1    | 90   | 31    | 0    | 0    | 0    | 0    | 20   | 75   | 8    | 11   |
| k_Bacteria | p_Bacteroidetes | c_Bacteroidia  | o_Bacteroidales   | f_Prevotellaceae       | g_Prevotella           | s_copri      | 812  | 1375 | 1111 | 6    | 3402 | 2827 | 47   | 502  | 1048 | 2399 | 1589  | 201  | 912  | 85   | 770  | 1928 | 305  | 21   | 286  |
| k_Bacteria | p_Bacteroidetes | c_Bacteroidia  | o_Bacteroidales   | f_[Paraprevotellaceae] | g_[Prevotella]         | Unclassified | 123  | 97   | 1344 | 0    | 631  | 569  | 0    | 0    | 0    | 0    | 0     | 611  | 0    | 0    | 184  | 191  | 0    | 0    | 0    |
| k_Bacteria | p_Firmicutes    | c_Clostridia   | o_Clostridiales   | f_[Mogibacteriaceae]   | g_Mogibacterium        | Unclassified | 14   | 0    | 2    | 2    | 0    | 5    | 0    | 0    | 5    | 0    | 0     | 2    | 3    | 0    | 0    | 1    | 0    | 5    | 1    |
| k_Bacteria | p_Spirochaetes  | c_Spirochaetes | o_Spirochaetales  | f_Spirochaetaeae       | g_Treponema            | Unclassified | 85   | 0    | 0    | 379  | 0    | 37   | 228  | 0    | 6    | 0    | 0     | 0    | 45   | 0    | 0    | 3    | 49   | 0    | 1    |
| k_Bacteria | p_Bacteroidetes | c_Bacteroidia  | o_Bacteroidales   | f_S24-7                | Unclassified           | Unclassified | 83   | 105  | 54   | 48   | 0    | 6    | 56   | 618  | 22   | 5    | 36    | 18   | 14   | 0    | 61   | 25   | 200  | 141  | 211  |

| Level_1    | Level_2          | Level_3                 | Level_4              | Level_5              | Level_6           | Level_7      | ss10 | sn15 | sn16 | ss19 | sn20 | ss21 | ss25 | sn26 | sn27 | ss28 | ss2 | ss30 | sn31 | sn35 | sn36 | sn5  | ss6  | ss8  | sn9  |
|------------|------------------|-------------------------|----------------------|----------------------|-------------------|--------------|------|------|------|------|------|------|------|------|------|------|-----|------|------|------|------|------|------|------|------|
| k_Bacteria | p_WPS-2          | Unclassified            | Unclassified         | Unclassified         | Unclassified      | Unclassified | 102  | 0    | 0    | 0    | 0    | 16   | 0    | 0    | 3    | 0    | 0   | 16   | 2    | 0    | 0    | 8    | 0    | 0    | 0    |
| k_Bacteria | p_Bacteroidetes  | c_Bacteroidia           | o_Bacteroidales      | f_Prevotellaceae     | g_Prevotellae     | s_copri      | 40   | 17   | 31   | 9    | 56   | 11   | 16   | 51   | 38   | 36   | 26  | 46   | 34   | 24   | 84   | 14   | 22   | 14   | 40   |
| k_Bacteria | p_Bacteroidetes  | c_Bacteroidia           | o_Bacteroidales      | f_Prevotellaceae     | g_Prevotellae     | s_copri      | 487  | 281  | 269  | 1    | 497  | 1448 | 34   | 367  | 347  | 501  | 357 | 71   | 312  | 89   | 731  | 323  | 155  | 3    | 57   |
| k_Bacteria | p_Bacteroidetes  | c_Bacteroidia           | o_Bacteroidales      | f_Prevotellaceae     | g_Prevotellae     | Unclassified | 196  | 1898 | 395  | 670  | 393  | 418  | 1726 | 326  | 776  | 1478 | 397 | 348  | 1195 | 928  | 1362 | 870  | 1418 | 1202 | 1037 |
| k_Bacteria | p_Firmicutes     | c_Clostridia            | o_Clostridiales      | Unclassified         | Unclassified      | Unclassified | 190  | 68   | 96   | 79   | 53   | 422  | 42   | 155  | 434  | 13   | 149 | 33   | 433  | 17   | 699  | 82   | 129  | 694  | 338  |
| k_Bacteria | p_Bacteroidetes  | c_Bacteroidia           | o_Bacteroidales      | f_Prevotellaceae     | g_Prevotellae     | Unclassified | 30   | 9    | 101  | 15   | 145  | 142  | 18   | 15   | 232  | 9    | 71  | 261  | 72   | 37   | 125  | 354  | 66   | 143  | 54   |
| k_Bacteria | p_Bacteroidetes  | c_Bacteroidia           | o_Bacteroidales      | f_Prevotellaceae     | g_Prevotellae     | s_copri      | 348  | 464  | 77   | 2411 | 1269 | 418  | 2602 | 4995 | 112  | 551  | 50  | 435  | 911  | 1672 | 267  | 1085 | 17   | 1826 | 1282 |
| k_Bacteria | p_Bacteroidetes  | c_Bacteroidia           | o_Bacteroidales      | f_Bacteroidaceae     | g_Bacteroides     | Unclassified | 20   | 412  | 135  | 2997 | 10   | 94   | 175  | 111  | 71   | 103  | 121 | 107  | 22   | 192  | 117  | 77   | 630  | 471  | 1053 |
| k_Bacteria | p_Bacteroidetes  | c_Bacteroidia           | o_Bacteroidales      | f_Prevotellaceae     | g_Prevotellae     | Unclassified | 467  | 1005 | 675  | 47   | 0    | 236  | 104  | 0    | 272  | 1210 | 0   | 391  | 541  | 0    | 1    | 1243 | 353  | 0    | 0    |
| k_Bacteria | p_Bacteroidetes  | c_Bacteroidia           | o_Bacteroidales      | f_Prevotellaceae     | g_Prevotellae     | Unclassified | 269  | 108  | 16   | 0    | 13   | 277  | 112  | 0    | 39   | 15   | 71  | 268  | 78   | 0    | 0    | 216  | 338  | 0    | 0    |
| k_Bacteria | p_Bacteroidetes  | c_Bacteroidia           | o_Bacteroidales      | f_S24-7              | Unclassified      | Unclassified | 111  | 59   | 53   | 18   | 66   | 35   | 28   | 100  | 107  | 60   | 78  | 16   | 13   | 23   | 105  | 23   | 68   | 98   | 7    |
| k_Bacteria | p_Proteobacteria | c_Epsilonproteobacteria | o_Campylobacteriales | f_Helicobacteraceae  | Unclassified      | Unclassified | 127  | 105  | 107  | 522  | 39   | 51   | 27   | 122  | 69   | 48   | 38  | 336  | 85   | 12   | 12   | 80   | 124  | 83   | 41   |
| k_Bacteria | p_Bacteroidetes  | c_Bacteroidia           | o_Bacteroidales      | f_S24-7              | Unclassified      | Unclassified | 16   | 0    | 17   | 0    | 0    | 2    | 1    | 20   | 0    | 4    | 2   | 0    | 0    | 1    | 0    | 0    | 3    | 13   | 0    |
| k_Bacteria | p_Actinobacteria | c_Actinobacteria        | o_Bifidobacteriales  | f_Bifidobacteriaceae | g_Bifidobacterium | Unclassified | 146  | 116  | 32   | 83   | 1    | 88   | 0    | 14   | 191  | 1    | 3   | 53   | 33   | 0    | 49   | 1    | 137  | 11   | 1    |

| Level_1    | Level_2         | Level_3       | Level_4            | Level_5                | Level_6           | Level_7      | ss10 | sn15 | sn16 | ss19 | sn20 | ss21 | ss25 | sn26 | sn27 | ss28 | ss2 | ss30 | sn31 | sn35 | sn36 | sn5 | ss6  | ss8 | sn9 |
|------------|-----------------|---------------|--------------------|------------------------|-------------------|--------------|------|------|------|------|------|------|------|------|------|------|-----|------|------|------|------|-----|------|-----|-----|
| k_Bacteria | p_Firmicutes    | c_Clostridia  | o_Clostridiales    | Unclassified           | Unclassified      | Unclassified | 51   | 25   | 1    | 54   | 1    | 0    | 0    | 33   | 0    | 0    | 0   | 69   | 1    | 1    | 35   | 3   | 115  | 1   | 0   |
| k_Bacteria | p_Bacteroidetes | c_Bacteroidia | o_Bacteroidales    | f_Porphyromonadaceae   | g_Parabacteroides | Unclassified | 264  | 159  | 105  | 355  | 0    | 160  | 188  | 291  | 128  | 133  | 142 | 206  | 119  | 157  | 135  | 321 | 245  | 244 | 100 |
| k_Bacteria | p_Firmicutes    | c_Bacilli     | o_Turicibacterales | f_Turicibacteraceae    | g_Turicibacter    | Unclassified | 347  | 957  | 5    | 1266 | 179  | 134  | 0    | 61   | 133  | 0    | 122 | 266  | 30   | 170  | 32   | 4   | 90   | 189 | 128 |
| k_Bacteria | p_Cyanobacteria | c_4C0d-2      | o_YS2              | Unclassified           | Unclassified      | Unclassified | 56   | 11   | 281  | 15   | 43   | 3    | 84   | 0    | 0    | 106  | 12  | 0    | 21   | 78   | 0    | 0   | 47   | 179 | 35  |
| k_Bacteria | p_Firmicutes    | c_Clostridia  | o_Clostridiales    | Unclassified           | Unclassified      | Unclassified | 9    | 0    | 6    | 3    | 1    | 3    | 3    | 7    | 17   | 4    | 6   | 55   | 7    | 27   | 18   | 4   | 21   | 12  | 6   |
| k_Bacteria | p_Firmicutes    | c_Clostridia  | o_Clostridiales    | f_Ruminococcaceae      | g_Oscillospira    | Unclassified | 78   | 52   | 303  | 96   | 59   | 69   | 92   | 184  | 110  | 98   | 43  | 214  | 25   | 228  | 87   | 60  | 72   | 62  | 65  |
| k_Bacteria | p_Bacteroidetes | c_Bacteroidia | o_Bacteroidales    | f_S24-7                | Unclassified      | Unclassified | 293  | 12   | 0    | 87   | 42   | 0    | 18   | 0    | 0    | 0    | 0   | 0    | 3    | 0    | 79   | 0   | 247  | 0   | 4   |
| k_Bacteria | p_Bacteroidetes | c_Bacteroidia | o_Bacteroidales    | f_[Paraprevotellaceae] | g_YRC22           | Unclassified | 154  | 206  | 69   | 92   | 153  | 274  | 170  | 77   | 121  | 79   | 349 | 38   | 164  | 59   | 132  | 135 | 103  | 520 | 685 |
| k_Bacteria | p_Firmicutes    | c_Clostridia  | o_Clostridiales    | f_Ruminococcaceae      | g_Oscillospira    | Unclassified | 106  | 25   | 96   | 238  | 24   | 24   | 96   | 138  | 40   | 20   | 24  | 269  | 63   | 94   | 46   | 15  | 147  | 35  | 144 |
| k_Bacteria | p_Firmicutes    | c_Bacilli     | o_Lactobacillales  | f_Lactobacillaceae     | g_Lactobacillus   | Unclassified | 147  | 89   | 1    | 350  | 213  | 17   | 20   | 1062 | 242  | 256  | 396 | 70   | 107  | 73   | 9    | 75  | 1597 | 4   | 23  |
| k_Bacteria | p_Bacteroidetes | c_Bacteroidia | o_Bacteroidales    | f_[Paraprevotellaceae] | Unclassified      | Unclassified | 1    | 0    | 0    | 0    | 0    | 0    | 0    | 0    | 0    | 0    | 0   | 0    | 0    | 0    | 1    | 0   | 1    | 0   | 0   |
| k_Bacteria | p_Bacteroidetes | c_Bacteroidia | o_Bacteroidales    | f_Prevotellaceae       | g_Prevotella      | Unclassified | 109  | 135  | 21   | 40   | 8    | 17   | 314  | 0    | 56   | 287  | 163 | 1    | 202  | 23   | 338  | 0   | 0    | 0   | 94  |
| k_Bacteria | p_Firmicutes    | c_Clostridia  | o_Clostridiales    | f_Clostridiaceae       | Unclassified      | Unclassified | 299  | 115  | 13   | 244  | 58   | 158  | 0    | 22   | 43   | 2    | 55  | 66   | 66   | 21   | 34   | 7   | 83   | 167 | 47  |
| k_Bacteria | p_Firmicutes    | c_Clostridia  | o_Clostridiales    | f_Ruminococcaceae      | Unclassified      | Unclassified | 235  | 38   | 96   | 138  | 564  | 261  | 240  | 9    | 219  | 312  | 222 | 64   | 116  | 18   | 75   | 261 | 366  | 213 | 271 |

| Level_1    | Level_2          | Level_3                 | Level_4              | Level_5               | Level_6          | Level_7        | ss1 | sn | sn | ss | sn | ss | sn | ss | sn | sn | ss2 | ss2 | ss | sn | sn | sn | ss | ss | sn |   |
|------------|------------------|-------------------------|----------------------|-----------------------|------------------|----------------|-----|----|----|----|----|----|----|----|----|----|-----|-----|----|----|----|----|----|----|----|---|
| k_Bacteria | p_Bacteroidetes  | c_Bacteroidia           | o_Bacteroidales      | f_Prevotellaceae      | g_Prevotellaceae | Unclassified   | 12  | 62 | 63 | 0  | 21 | 73 | 59 | 0  | 60 | 14 | 12  | 13  | 14 | 53 | 29 | 55 | 23 | 10 | 10 | 7 |
| k_Bacteria | p_Firmicutes     | c_Clostridia            | o_Clostridiales      | f_Lachnospiraceae     | Unclassified     | Unclassified   | 9   | 5  | 2  | 0  | 0  | 2  | 0  | 11 | 0  | 4  | 1   | 0   | 0  | 0  | 0  | 0  | 0  | 0  | 0  | 0 |
| k_Bacteria | p_Proteobacteria | c_Betaproteobacteria    | o_Burkholderiales    | f_Alcaligenaceae      | g_Sutterella     | Unclassified   | 35  | 11 | 12 | 23 | 31 | 96 | 33 | 28 | 96 | 11 | 20  | 14  | 80 | 10 | 28 | 36 | 17 | 37 | 38 | 0 |
| k_Bacteria | p_Firmicutes     | c_Clostridia            | o_Clostridiales      | f_Clostridiaceae      | g_Clostridium    | Unclassified   | 5   | 2  | 0  | 4  | 0  | 0  | 0  | 0  | 11 | 0  | 0   | 2   | 2  | 5  | 0  | 1  | 0  | 0  | 0  | 4 |
| k_Bacteria | p_Firmicutes     | c_Clostridia            | o_Clostridiales      | f_Ruminococcaceae     | g_Ruminococcus   | s_flavifaciens | 93  | 14 | 0  | 5  | 84 | 17 | 0  | 0  | 18 | 11 | 40  | 41  | 32 | 0  | 84 | 16 | 12 | 15 | 33 |   |
| k_Bacteria | p_Firmicutes     | c_Clostridia            | o_Clostridiales      | f_Ruminococcaceae     | Unclassified     | Unclassified   | 42  | 16 | 16 | 22 | 32 | 35 | 28 | 0  | 33 | 8  | 14  | 32  | 15 | 33 | 31 | 21 | 77 | 13 | 19 |   |
| k_Bacteria | p_Firmicutes     | c_Bacilli               | o_Lactobacillales    | f_Lactobacillaceae    | g_Lactobacillus  | s_reuteri      | 16  | 31 | 8  | 11 | 14 | 30 | 13 | 87 | 14 | 45 | 14  | 9   | 7  | 2  | 0  | 21 | 23 | 37 | 6  |   |
| k_Bacteria | p_Firmicutes     | c_Clostridia            | o_Clostridiales      | f_Lachnospiraceae     | g_Blautia        | Unclassified   | 40  | 2  | 7  | 0  | 31 | 40 | 6  | 3  | 5  | 41 | 28  | 2   | 1  | 21 | 5  | 6  | 6  | 4  | 4  |   |
| k_Bacteria | p_Proteobacteria | c_Deltaproteobacteria   | o_Desulfovibrionales | f_Desulfovibrionaceae | g_Desulfovibrio  | Unclassified   | 5   | 0  | 0  | 1  | 0  | 0  | 0  | 0  | 0  | 0  | 1   | 0   | 0  | 0  | 1  | 0  | 1  | 1  | 0  |   |
| k_Bacteria | p_Bacteroidetes  | c_Bacteroidia           | o_Bacteroidales      | f_p-2534-18B5         | Unclassified     | Unclassified   | 17  | 0  | 0  | 0  | 0  | 22 | 0  | 0  | 77 | 0  | 0   | 14  | 70 | 0  | 0  | 12 | 17 | 46 | 37 | 8 |
| k_Bacteria | p_Bacteroidetes  | c_Bacteroidia           | o_Bacteroidales      | f_Prevotellaceae      | g_Prevotellaceae | s_copri        | 12  | 3  | 4  | 0  | 7  | 32 | 0  | 1  | 4  | 2  | 5   | 1   | 11 | 1  | 26 | 8  | 5  | 0  | 0  |   |
| k_Bacteria | p_Proteobacteria | c_Betaproteobacteria    | Unclassified         | Unclassified          | Unclassified     | Unclassified   | 3   | 0  | 0  | 81 | 23 | 0  | 0  | 0  | 10 | 5  | 0   | 0   | 0  | 0  | 0  | 0  | 52 | 0  | 0  |   |
| k_Bacteria | p_Proteobacteria | c_Epsilonproteobacteria | o_Campylobacteriales | f_Helicobacteraceae   | g_Flexispira     | Unclassified   | 11  | 0  | 25 | 27 | 4  | 2  | 16 | 0  | 2  | 13 | 0   | 10  | 15 | 7  | 2  | 3  | 3  | 17 | 0  |   |
| k_Bacteria | p_Bacteroidetes  | c_Bacteroidia           | o_Bacteroidales      | f_S24-7               | Unclassified     | Unclassified   | 66  | 0  | 3  | 1  | 15 | 22 | 25 | 6  | 24 | 9  | 20  | 5   | 23 | 0  | 35 | 17 | 19 | 2  | 32 |   |

| Level_1    | Level_2           | Level_3       | Level_4           | Level_5            | Level_6           | Level_7      | ss10 | sn15 | sn16 | ss19 | sn20 | ss21 | ss25 | sn26 | sn27 | ss28 | ss2 | ss30 | sn31 | sn35 | sn36 | sn5 | ss6 | ss8 | sn9 |
|------------|-------------------|---------------|-------------------|--------------------|-------------------|--------------|------|------|------|------|------|------|------|------|------|------|-----|------|------|------|------|-----|-----|-----|-----|
| k_Bacteria | p_Verrucomicrobia | c_Verrucosae  | o_WCHB1-41        | f_RFP12            | Unclassified      | Unclassified | 13   | 0    | 0    | 3    | 4    | 16   | 3    | 0    | 11   | 4    | 11  | 85   | 19   | 0    | 0    | 32  | 14  | 35  | 12  |
| k_Bacteria | p_Bacteroidetes   | c_Bacteroidia | o_Bacteroidales   | f_S24-7            | Unclassified      | Unclassified | 65   | 21   | 29   | 73   | 17   | 21   | 36   | 20   | 32   | 27   | 37  | 33   | 17   | 20   | 57   | 31  | 39  | 30  | 40  |
| k_Bacteria | p_Bacteroidetes   | c_Bacteroidia | o_Bacteroidales   | Unclassified       | Unclassified      | Unclassified | 71   | 32   | 133  | 26   | 54   | 35   | 41   | 0    | 123  | 12   | 121 | 410  | 24   | 139  | 172  | 160 | 137 | 157 | 145 |
| k_Bacteria | p_Firmicutes      | c_Clostridia  | o_Clostridiales   | Unclassified       | Unclassified      | Unclassified | 89   | 17   | 0    | 31   | 10   | 72   | 0    | 0    | 32   | 17   | 4   | 6    | 7    | 7    | 7    | 29  | 29  | 1   | 12  |
| k_Bacteria | p_Firmicutes      | c_Clostridia  | o_Clostridiales   | f_Ruminococaceae   | g_Oscillospirales | Unclassified | 47   | 17   | 101  | 79   | 9    | 33   | 36   | 70   | 65   | 52   | 17  | 112  | 19   | 154  | 109  | 35  | 64  | 34  | 18  |
| k_Bacteria | p_Firmicutes      | c_Bacilli     | o_Lactobacillales | f_Lactobacillaceae | g_Lactobacillales | Unclassified | 158  | 7    | 0    | 60   | 13   | 1    | 1    | 5    | 39   | 2    | 99  | 12   | 7    | 0    | 0    | 0   | 100 | 1   | 0   |
| k_Bacteria | p_Firmicutes      | c_Clostridia  | o_Clostridiales   | f_Lachnospiraceae  | Unclassified      | Unclassified | 9    | 3    | 6    | 4    | 6    | 3    | 10   | 0    | 26   | 22   | 2   | 0    | 2    | 0    | 0    | 3   | 12  | 1   | 36  |
| k_Bacteria | p_Bacteroidetes   | c_Bacteroidia | o_Bacteroidales   | f_S24-7            | Unclassified      | Unclassified | 20   | 21   | 25   | 5    | 23   | 43   | 27   | 28   | 53   | 28   | 18  | 28   | 21   | 17   | 88   | 23  | 53  | 41  | 38  |
| k_Bacteria | p_Bacteroidetes   | c_Bacteroidia | o_Bacteroidales   | f_S24-7            | Unclassified      | Unclassified | 235  | 0    | 0    | 0    | 177  | 0    | 82   | 34   | 61   | 6    | 5   | 0    | 0    | 0    | 0    | 2   | 0   | 192 | 145 |
| k_Bacteria | p_Firmicutes      | c_Clostridia  | o_Clostridiales   | f_Lachnospiraceae  | g_Blautia         | Unclassified | 193  | 16   | 5    | 2    | 7    | 126  | 0    | 0    | 15   | 154  | 2   | 1    | 0    | 13   | 0    | 14  | 0   | 0   | 2   |
| k_Bacteria | p_Bacteroidetes   | c_Bacteroidia | o_Bacteroidales   | Unclassified       | Unclassified      | Unclassified | 34   | 66   | 240  | 44   | 85   | 175  | 307  | 0    | 204  | 211  | 143 | 257  | 116  | 0    | 0    | 101 | 147 | 18  | 202 |
| k_Bacteria | p_Firmicutes      | c_Clostridia  | o_Clostridiales   | f_Ruminococaceae   | g_Oscillospirales | Unclassified | 284  | 87   | 106  | 567  | 53   | 164  | 441  | 391  | 115  | 36   | 57  | 297  | 129  | 3212 | 46   | 140 | 318 | 58  | 37  |
| k_Bacteria | p_Firmicutes      | c_Clostridia  | o_Clostridiales   | f_Lachnospiraceae  | Unclassified      | Unclassified | 9    | 27   | 4    | 0    | 6    | 0    | 4    | 0    | 50   | 0    | 7   | 0    | 13   | 4    | 0    | 1   | 6   | 5   | 35  |
| k_Bacteria | p_Firmicutes      | c_Clostridia  | o_Clostridiales   | f_Lachnospiraceae  | Unclassified      | Unclassified | 51   | 5    | 6    | 14   | 9    | 24   | 9    | 30   | 88   | 30   | 14  | 6    | 11   | 9    | 67   | 27  | 27  | 38  | 33  |

| Level_1    | Level_2         | Level_3           | Level_4              | Level_5                | Level_6               | Level_7      | ss10 | sn15 | sn16 | ss19 | sn20 | ss21 | ss25 | sn26 | sn27 | ss28 | ss2 | ss30 | sn31 | sn35 | sn36 | sn5 | ss6 | ss8 | sn9 |
|------------|-----------------|-------------------|----------------------|------------------------|-----------------------|--------------|------|------|------|------|------|------|------|------|------|------|-----|------|------|------|------|-----|-----|-----|-----|
| k_Bacteria | p_Bacteroidetes | c_Bacteroidia     | o_Bacteroidales      | f_S24-7                | Unclassified          | Unclassified | 100  | 527  | 197  | 47   | 367  | 368  | 129  | 1742 | 521  | 136  | 238 | 339  | 236  | 0    | 687  | 226 | 548 | 238 | 868 |
| k_Bacteria | p_Firmicutes    | c_Clostridia      | o_Clostridiales      | f_Ruminococaceae       | Unclassified          | Unclassified | 3    | 4    | 15   | 9    | 1    | 2    | 5    | 0    | 3    | 0    | 3   | 11   | 2    | 31   | 5    | 2   | 4   | 9   | 6   |
| k_Bacteria | p_Firmicutes    | c_Clostridia      | o_Clostridiales      | f_Ruminococaceae       | Unclassified          | Unclassified | 95   | 2    | 16   | 0    | 0    | 31   | 16   | 0    | 20   | 0    | 0   | 2    | 0    | 0    | 12   | 1   | 51  | 16  | 8   |
| k_Bacteria | p_Spirochaetes  | c_Spirochaetes    | o_Spirochaetales     | f_Spirochaetaeae       | g_Treponema           | Unclassified | 6    | 2    | 202  | 13   | 9    | 12   | 12   | 2    | 17   | 5    | 1   | 143  | 8    | 229  | 14   | 16  | 0   | 27  | 6   |
| k_Bacteria | p_Firmicutes    | c_Erysipelotrichi | o_Erysipelotrichales | f_Erysipelotrichaceae  | g_Allobaculum         | Unclassified | 89   | 24   | 15   | 30   | 6    | 20   | 0    | 123  | 232  | 9    | 8   | 12   | 10   | 71   | 102  | 0   | 140 | 37  | 68  |
| k_Bacteria | p_Bacteroidetes | c_Bacteroidia     | o_Bacteroidales      | Unclassified           | Unclassified          | Unclassified | 7    | 4    | 28   | 21   | 12   | 1    | 6    | 9    | 33   | 13   | 0   | 7    | 3    | 7    | 41   | 5   | 1   | 0   | 17  |
| k_Bacteria | p_Firmicutes    | c_Clostridia      | o_Clostridiales      | f_Veillonellaceae      | g_Phascalotobacterium | Unclassified | 1    | 3    | 0    | 0    | 0    | 1    | 0    | 0    | 0    | 1    | 0   | 0    | 0    | 0    | 0    | 0   | 0   | 0   | 0   |
| k_Bacteria | p_Firmicutes    | c_Clostridia      | o_Clostridiales      | f_Lachnospiraceae      | Unclassified          | Unclassified | 146  | 11   | 1    | 23   | 150  | 4    | 32   | 0    | 51   | 58   | 1   | 0    | 0    | 11   | 0    | 5   | 4   | 0   | 0   |
| k_Bacteria | p_Bacteroidetes | c_Bacteroidia     | o_Bacteroidales      | Unclassified           | Unclassified          | Unclassified | 9    | 0    | 0    | 2    | 12   | 7    | 9    | 0    | 8    | 2    | 3   | 21   | 13   | 10   | 0    | 17  | 5   | 8   | 13  |
| k_Bacteria | p_Bacteroidetes | c_Bacteroidia     | o_Bacteroidales      | f_S24-7                | Unclassified          | Unclassified | 39   | 4    | 51   | 0    | 9    | 4    | 15   | 19   | 39   | 21   | 41  | 8    | 12   | 21   | 17   | 2   | 6   | 1   | 24  |
| k_Bacteria | p_Firmicutes    | c_Clostridia      | o_Clostridiales      | f_Ruminococaceae       | g_Oscillospira        | Unclassified | 25   | 37   | 88   | 24   | 1    | 66   | 20   | 18   | 3    | 7    | 5   | 48   | 3    | 184  | 2    | 2   | 34  | 45  | 13  |
| k_Bacteria | p_Firmicutes    | c_Clostridia      | o_Clostridiales      | f_Ruminococaceae       | Unclassified          | Unclassified | 45   | 11   | 0    | 6    | 0    | 2    | 82   | 55   | 0    | 0    | 2   | 164  | 6    | 3    | 9    | 1   | 68  | 2   | 27  |
| k_Bacteria | p_Bacteroidetes | c_Bacteroidia     | o_Bacteroidales      | f_[Paraprevotellaceae] | g_CF231               | Unclassified | 25   | 3    | 8    | 3    | 8    | 52   | 932  | 8    | 0    | 0    | 1   | 0    | 52   | 0    | 10   | 74  | 438 | 7   | 111 |
| k_Bacteria | p_Firmicutes    | c_Clostridia      | o_Clostridiales      | f_Lachnospiraceae      | Unclassified          | Unclassified | 47   | 44   | 0    | 35   | 21   | 7    | 0    | 0    | 11   | 6    | 2   | 0    | 0    | 0    | 5    | 0   | 1   | 0   | 0   |

| Level_1    | Level_2         | Level_3           | Level_4              | Level_5               | Level_6        | Level_7      | ss10 | sn15 | sn16 | ss19 | sn20 | ss21 | ss25 | sn26 | sn27 | ss28 | ss2 | ss30 | sn31 | sn35 | sn36 | sn5 | ss6 | ss8 | sn9 |
|------------|-----------------|-------------------|----------------------|-----------------------|----------------|--------------|------|------|------|------|------|------|------|------|------|------|-----|------|------|------|------|-----|-----|-----|-----|
| k_Bacteria | p_Bacteroidetes | c_Bacteroidia     | o_Bacteroidales      | f_Prevotellaceae      | g_Prevotellae  | Unclassified | 95   | 103  | 299  | 186  | 493  | 356  | 106  | 719  | 169  | 86   | 93  | 1127 | 313  | 314  | 396  | 140 | 258 | 313 | 447 |
| k_Bacteria | p_Firmicutes    | c_Clostridia      | o_Clostridiales      | Unclassified          | Unclassified   | Unclassified | 104  | 38   | 61   | 44   | 116  | 87   | 119  | 14   | 207  | 87   | 46  | 106  | 81   | 60   | 8    | 52  | 153 | 49  | 47  |
| k_Bacteria | p_Firmicutes    | c_Erysipelotrichi | o_Erysipelotrichales | f_Erysipelotrichaceae | Unclassified   | Unclassified | 6    | 11   | 8    | 0    | 8    | 16   | 13   | 0    | 15   | 4    | 1   | 6    | 2    | 0    | 9    | 21  | 5   | 0   | 6   |
| k_Bacteria | p_Teneriutes    | c_Mollicutes      | o_RF39               | Unclassified          | Unclassified   | Unclassified | 13   | 46   | 0    | 4    | 0    | 0    | 1    | 0    | 0    | 0    | 4   | 0    | 0    | 0    | 0    | 40  | 76  | 0   | 12  |
| k_Bacteria | p_Firmicutes    | c_Clostridia      | o_Clostridiales      | f_Ruminococaceae      | g_Oscillospira | Unclassified | 39   | 33   | 149  | 360  | 10   | 49   | 46   | 51   | 29   | 24   | 20  | 153  | 31   | 153  | 43   | 25  | 43  | 33  | 19  |
| k_Bacteria | p_Firmicutes    | c_Clostridia      | o_Clostridiales      | f_Ruminococaceae      | g_Ruminococcus | Unclassified | 7    | 0    | 0    | 0    | 0    | 0    | 0    | 0    | 0    | 0    | 0   | 0    | 1    | 0    | 0    | 0   | 0   | 0   | 0   |
| k_Bacteria | p_Bacteroidetes | c_Bacteroidia     | o_Bacteroidales      | f_RF16                | Unclassified   | Unclassified | 74   | 34   | 24   | 133  | 13   | 95   | 250  | 229  | 134  | 37   | 80  | 172  | 32   | 191  | 26   | 202 | 31  | 158 | 133 |
| k_Bacteria | p_Firmicutes    | c_Clostridia      | o_Clostridiales      | f_Lachnospiraceae     | Unclassified   | Unclassified | 95   | 0    | 1    | 67   | 42   | 0    | 0    | 0    | 20   | 0    | 0   | 8    | 0    | 0    | 0    | 2   | 5   | 1   | 12  |
| k_Bacteria | p_Bacteroidetes | c_Bacteroidia     | o_Bacteroidales      | f_S24-7               | Unclassified   | Unclassified | 11   | 0    | 0    | 0    | 0    | 2    | 5    | 51   | 17   | 3    | 0   | 0    | 0    | 15   | 5    | 0   | 25  | 0   | 2   |
| k_Bacteria | p_Bacteroidetes | c_Bacteroidia     | o_Bacteroidales      | f_Prevotellaceae      | g_Prevotellae  | Unclassified | 13   | 8    | 17   | 16   | 3    | 17   | 19   | 29   | 10   | 16   | 24  | 68   | 21   | 35   | 35   | 25  | 18  | 41  | 32  |
| k_Bacteria | p_Firmicutes    | c_Clostridia      | o_Clostridiales      | f_Veillonellaceae     | Unclassified   | Unclassified | 128  | 60   | 1103 | 679  | 97   | 129  | 117  | 272  | 67   | 73   | 113 | 788  | 52   | 2071 | 127  | 87  | 96  | 3   | 14  |
| k_Bacteria | p_Firmicutes    | c_Clostridia      | o_Clostridiales      | f_Ruminococaceae      | Unclassified   | Unclassified | 23   | 25   | 147  | 74   | 26   | 80   | 45   | 21   | 36   | 28   | 21  | 115  | 44   | 422  | 125  | 14  | 37  | 25  | 29  |
| k_Bacteria | p_Firmicutes    | c_Clostridia      | o_Clostridiales      | f_Ruminococaceae      | Unclassified   | Unclassified | 154  | 41   | 16   | 12   | 44   | 37   | 0    | 0    | 25   | 26   | 13  | 41   | 7    | 29   | 42   | 39  | 0   | 6   | 21  |
| k_Bacteria | p_Firmicutes    | c_Erysipelotrichi | o_Erysipelotrichales | f_Erysipelotrichaceae | g_Allobaculum  | Unclassified | 24   | 28   | 0    | 19   | 0    | 78   | 2    | 202  | 68   | 7    | 8   | 11   | 12   | 2    | 5    | 1   | 159 | 10  | 37  |



| Level_1    | Level_2         | Level_3         | Level_4            | Level_5                | Level_6         | Level_7      | ss10 | sn15 | sn16 | ss19 | sn20 | ss21 | ss25 | sn26 | sn27 | ss28 | ss2 | ss30 | sn31 | sn35 | sn36 | sn5  | ss6 | ss8  | sn9  |
|------------|-----------------|-----------------|--------------------|------------------------|-----------------|--------------|------|------|------|------|------|------|------|------|------|------|-----|------|------|------|------|------|-----|------|------|
| k_Bacteria | p_Bacteroidetes | c_Bacteroidia   | o_Bacteroidales    | f_Prevotellaceae       | g_Prevotellae   | Unclassified | 9    | 4    | 0    | 0    | 0    | 9    | 0    | 0    | 7    | 0    | 1   | 1    | 2    | 4    | 25   | 1    | 1   | 0    | 2    |
| k_Bacteria | p_Bacteroidetes | c_Bacteroidia   | o_Bacteroidales    | f_S24-7                | Unclassified    | Unclassified | 68   | 0    | 0    | 0    | 32   | 60   | 0    | 0    | 41   | 0    | 0   | 88   | 53   | 0    | 0    | 0    | 9   | 0    | 0    |
| k_Bacteria | p_Firmicutes    | c_Clostridia    | o_Clostridiales    | f_Lachnospiraceae      | Unclassified    | Unclassified | 36   | 0    | 0    | 0    | 0    | 4    | 0    | 0    | 21   | 0    | 1   | 0    | 0    | 4    | 0    | 3    | 0   | 0    | 0    |
| k_Bacteria | p_Firmicutes    | c_Clostridia    | o_Clostridiales    | f_Ruminococcaceae      | Unclassified    | Unclassified | 9    | 4    | 31   | 48   | 2    | 3    | 6    | 3    | 7    | 2    | 1   | 68   | 5    | 112  | 7    | 10   | 2   | 1    | 0    |
| k_Bacteria | p_Firmicutes    | c_Clostridia    | o_Clostridiales    | f_[Mogibacteriaceae]   | Unclassified    | Unclassified | 10   | 11   | 20   | 3    | 5    | 13   | 11   | 18   | 9    | 17   | 10  | 33   | 8    | 26   | 12   | 10   | 15  | 18   | 9    |
| k_Bacteria | Unclassified    | Unclassified    | Unclassified       | Unclassified           | Unclassified    | Unclassified | 47   | 19   | 0    | 0    | 0    | 197  | 0    | 0    | 0    | 0    | 12  | 0    | 19   | 0    | 0    | 70   | 0   | 0    | 0    |
| k_Bacteria | p_Firmicutes    | c_Clostridia    | o_Clostridiales    | f_Ruminococcaceae      | Unclassified    | Unclassified | 2    | 1    | 14   | 12   | 3    | 3    | 4    | 10   | 15   | 9    | 12  | 18   | 1    | 10   | 3    | 9    | 6   | 9    | 5    |
| k_Bacteria | p_Elusimicrobia | c_Elusimicrobia | o_Elusimicrobiales | f_Elusimicrobiaceae    | Unclassified    | Unclassified | 36   | 59   | 107  | 29   | 37   | 121  | 215  | 49   | 118  | 120  | 4   | 510  | 37   | 201  | 51   | 114  | 9   | 185  | 14   |
| k_Bacteria | p_Firmicutes    | c_Clostridia    | o_Clostridiales    | f_Ruminococcaceae      | g_Oscillospira  | Unclassified | 55   | 7    | 35   | 62   | 28   | 4    | 18   | 40   | 54   | 39   | 15  | 202  | 25   | 30   | 83   | 39   | 104 | 8    | 63   |
| k_Bacteria | p_Bacteroidetes | c_Bacteroidia   | o_Bacteroidales    | f_S24-7                | Unclassified    | Unclassified | 18   | 115  | 99   | 97   | 111  | 17   | 188  | 354  | 55   | 21   | 159 | 112  | 58   | 43   | 88   | 66   | 55  | 104  | 305  |
| k_Bacteria | p_Bacteroidetes | c_Bacteroidia   | o_Bacteroidales    | f_[Paraprevotellaceae] | g_[Prevotellae] | Unclassified | 147  | 306  | 77   | 1245 | 2    | 194  | 0    | 1290 | 252  | 145  | 569 | 321  | 243  | 5    | 26   | 1512 | 30  | 2490 | 1490 |
| k_Bacteria | p_Bacteroidetes | c_Bacteroidia   | o_Bacteroidales    | Unclassified           | Unclassified    | Unclassified | 5    | 7    | 1    | 0    | 2    | 2    | 0    | 17   | 7    | 2    | 0   | 3    | 0    | 0    | 0    | 0    | 0   | 11   | 9    |
| k_Bacteria | p_Firmicutes    | c_Clostridia    | o_Clostridiales    | Unclassified           | Unclassified    | Unclassified | 24   | 12   | 99   | 67   | 25   | 18   | 8    | 30   | 28   | 7    | 5   | 184  | 34   | 105  | 32   | 15   | 21  | 15   | 21   |
| k_Bacteria | p_Firmicutes    | c_Clostridia    | o_Clostridiales    | Unclassified           | Unclassified    | Unclassified | 5    | 0    | 0    | 0    | 5    | 4    | 1    | 4    | 9    | 3    | 0   | 7    | 1    | 2    | 0    | 0    | 1   | 2    | 1    |

| Level_1    | Level_2          | Level_3               | Level_4              | Level_5                      | Level_6              | Level_7      | ss10 | sn15 | sn16 | ss19 | sn20 | ss21 | ss25 | sn26 | sn27 | ss28 | ss2 | ss30 | sn31 | sn35 | sn36 | sn5 | ss6 | ss8 | sn9 |
|------------|------------------|-----------------------|----------------------|------------------------------|----------------------|--------------|------|------|------|------|------|------|------|------|------|------|-----|------|------|------|------|-----|-----|-----|-----|
| k_Bacteria | p_Firmicutes     | c_Clostridiales       | o_Clostridiales      | f_Lachnospiraceae            | Unclassified         | Unclassified | 32   | 1    | 0    | 24   | 1    | 68   | 49   | 0    | 23   | 6    | 33  | 6    | 47   | 49   | 27   | 83  | 21  | 10  | 23  |
| k_Bacteria | p_Firmicutes     | c_Bacillales          | o_Lactobacillales    | f_Lactobacillaceae           | g_Lactobacillus      | Unclassified | 11   | 0    | 2    | 0    | 0    | 0    | 0    | 0    | 29   | 0    | 0   | 0    | 9    | 0    | 16   | 0   | 11  | 12  | 0   |
| k_Bacteria | p_Firmicutes     | c_Clostridiales       | o_Clostridiales      | f_Ruminococcaceae            | g_Oscillospira       | Unclassified | 1    | 0    | 0    | 0    | 1    | 0    | 0    | 0    | 4    | 0    | 1   | 0    | 1    | 1    | 0    | 0   | 0   | 0   | 2   |
| k_Bacteria | p_Proteobacteria | c_Deltaproteobacteria | o_Desulfovibrionales | f_Desulfovibrionaceae        | Unclassified         | Unclassified | 43   | 62   | 38   | 16   | 51   | 69   | 32   | 59   | 27   | 33   | 22  | 46   | 64   | 12   | 45   | 26  | 91  | 24  | 34  |
| k_Bacteria | Unclassified     | Unclassified          | Unclassified         | Unclassified                 | Unclassified         | Unclassified | 1    | 0    | 0    | 0    | 0    | 0    | 0    | 0    | 0    | 0    | 0   | 0    | 0    | 0    | 0    | 0   | 1   | 3   | 1   |
| k_Bacteria | p_Firmicutes     | c_Clostridiales       | o_Clostridiales      | f_Lachnospiraceae            | g_Blautia            | Unclassified | 19   | 30   | 7    | 2    | 27   | 27   | 19   | 6    | 12   | 5    | 3   | 8    | 1    | 3    | 6    | 4   | 29  | 7   | 7   |
| k_Bacteria | p_Bacteroidetes  | c_Bacteroidia         | o_Bacteroidales      | f_p-2534-18B5                | Unclassified         | Unclassified | 14   | 11   | 12   | 0    | 75   | 12   | 0    | 0    | 4    | 0    | 10  | 0    | 5    | 0    | 0    | 64  | 0   | 20  | 0   |
| k_Archaea  | p_Euryarchaeota  | c_Thermoplasmata      | o_E2                 | f_[Methanomassiliococcaceae] | g_vadinCA11          | Unclassified | 75   | 8    | 3    | 22   | 61   | 79   | 0    | 0    | 75   | 80   | 12  | 32   | 69   | 72   | 82   | 42  | 63  | 19  | 34  |
| k_Bacteria | p_Bacteroidetes  | c_Bacteroidia         | o_Bacteroidales      | f_S24-7                      | Unclassified         | Unclassified | 34   | 7    | 25   | 41   | 27   | 36   | 6    | 99   | 75   | 10   | 2   | 43   | 33   | 0    | 15   | 11  | 34  | 83  | 79  |
| k_Bacteria | p_Firmicutes     | c_Clostridiales       | o_Clostridiales      | f_Ruminococcaceae            | g_Ruminococcus       | Unclassified | 53   | 86   | 2    | 5    | 29   | 18   | 0    | 67   | 38   | 0    | 7   | 13   | 3    | 0    | 2    | 23  | 25  | 6   | 43  |
| k_Bacteria | p_Firmicutes     | Unclassified          | Unclassified         | Unclassified                 | Unclassified         | Unclassified | 4    | 2    | 4    | 3    | 0    | 3    | 3    | 0    | 8    | 0    | 0   | 0    | 1    | 4    | 0    | 6   | 12  | 8   | 2   |
| k_Bacteria | p_Bacteroidetes  | c_Bacteroidia         | o_Bacteroidales      | f_Porphyromonadaceae         | g_Parabacteroides    | Unclassified | 17   | 25   | 38   | 26   | 50   | 17   | 11   | 21   | 19   | 33   | 56  | 31   | 9    | 19   | 17   | 14  | 10  | 22  | 25  |
| k_Bacteria | p_Firmicutes     | c_Clostridiales       | o_Clostridiales      | f_Ruminococcaceae            | g_Ruminococcus       | Unclassified | 30   | 0    | 0    | 0    | 1    | 0    | 0    | 35   | 3    | 4    | 30  | 0    | 0    | 0    | 3    | 19  | 6   | 2   | 0   |
| k_Archaea  | p_Euryarchaeota  | c_Methanobacteria     | o_Methanobacteriales | f_Methanobacteriaceae        | g_Methanobrevibacter | Unclassified | 13   | 5    | 19   | 3    | 20   | 23   | 8    | 0    | 37   | 0    | 44  | 42   | 43   | 12   | 10   | 32  | 12  | 25  | 54  |

| Level_1    | Level_2         | Level_3       | Level_4           | Level_5              | Level_6           | Level_7      | ss10 | sn15 | sn16 | ss19 | sn20 | ss21 | ss25 | sn26 | sn27 | ss28 | ss2 | ss30 | sn31 | sn35 | sn36 | sn5 | ss6 | ss8 | sn9 |
|------------|-----------------|---------------|-------------------|----------------------|-------------------|--------------|------|------|------|------|------|------|------|------|------|------|-----|------|------|------|------|-----|-----|-----|-----|
| k_Bacteria | p_Bacteroidetes | c_Bacteroidia | o_Bacteroidales   | f_Prevotellaceae     | g_Prevotellae     | Unclassified | 129  | 71   | 96   | 366  | 173  | 59   | 288  | 31   | 110  | 106  | 272 | 113  | 96   | 7    | 94   | 306 | 391 | 248 | 139 |
| k_Bacteria | p_Firmicutes    | c_Clostridia  | o_Clostridiales   | f_Ruminococcaceae    | Unclassified      | Unclassified | 85   | 0    | 0    | 0    | 0    | 0    | 0    | 0    | 0    | 0    | 0   | 0    | 0    | 0    | 0    | 0   | 0   | 0   | 0   |
| k_Bacteria | p_Firmicutes    | c_Clostridia  | o_Clostridiales   | Unclassified         | Unclassified      | Unclassified | 23   | 79   | 1462 | 1    | 125  | 1    | 246  | 62   | 3    | 6    | 0   | 38   | 0    | 515  | 300  | 5   | 15  | 20  | 0   |
| k_Bacteria | p_Bacteroidetes | c_Bacteroidia | o_Bacteroidales   | f_Prevotellaceae     | Unclassified      | Unclassified | 40   | 21   | 17   | 68   | 8    | 20   | 36   | 41   | 57   | 10   | 22  | 49   | 28   | 37   | 58   | 43  | 47  | 73  | 47  |
| k_Bacteria | p_Bacteroidetes | c_Bacteroidia | o_Bacteroidales   | Unclassified         | Unclassified      | Unclassified | 42   | 18   | 8    | 0    | 0    | 10   | 14   | 32   | 9    | 3    | 14  | 0    | 0    | 42   | 9    | 0   | 39  | 10  | 1   |
| k_Bacteria | p_Firmicutes    | c_Clostridia  | o_Clostridiales   | f_Ruminococcaceae    | g_Oscillospira    | Unclassified | 34   | 16   | 51   | 87   | 16   | 18   | 13   | 33   | 6    | 3    | 12  | 109  | 19   | 89   | 13   | 6   | 19  | 45  | 37  |
| k_Bacteria | p_Firmicutes    | c_Clostridia  | o_Clostridiales   | f_Ruminococcaceae    | Unclassified      | Unclassified | 13   | 0    | 5    | 9    | 3    | 9    | 1    | 3    | 35   | 10   | 3   | 14   | 9    | 33   | 32   | 2   | 6   | 9   | 5   |
| k_Bacteria | p_Bacteroidetes | c_Bacteroidia | o_Bacteroidales   | f_Prevotellaceae     | g_Prevotellae     | Unclassified | 5    | 5    | 5    | 6    | 4    | 11   | 13   | 6    | 15   | 4    | 14  | 26   | 11   | 12   | 33   | 8   | 14  | 5   | 11  |
| k_Bacteria | p_Firmicutes    | c_Clostridia  | o_Clostridiales   | f_Ruminococcaceae    | g_Oscillospira    | Unclassified | 3    | 2    | 10   | 10   | 3    | 1    | 4    | 3    | 4    | 0    | 1   | 11   | 0    | 6    | 3    | 3   | 7   | 3   | 1   |
| k_Bacteria | p_Firmicutes    | c_Bacilli     | o_Lactobacillales | f_Streptococcaceae   | g_Streptococcus   | Unclassified | 28   | 6    | 0    | 5    | 149  | 21   | 139  | 27   | 21   | 19   | 11  | 2    | 12   | 2    | 2    | 11  | 12  | 1   | 9   |
| k_Bacteria | p_Firmicutes    | c_Clostridia  | o_Clostridiales   | Unclassified         | Unclassified      | Unclassified | 55   | 65   | 716  | 26   | 122  | 32   | 0    | 13   | 209  | 10   | 7   | 3    | 38   | 25   | 296  | 11  | 11  | 9   | 118 |
| k_Bacteria | Unclassified    | Unclassified  | Unclassified      | Unclassified         | Unclassified      | Unclassified | 16   | 1    | 0    | 3    | 0    | 5    | 0    | 0    | 0    | 0    | 7   | 0    | 0    | 0    | 0    | 3   | 4   | 19  | 2   |
| k_Bacteria | p_Bacteroidetes | c_Bacteroidia | o_Bacteroidales   | f_Porphyromonadaceae | g_Parabacteroides | Unclassified | 6    | 10   | 8    | 1284 | 85   | 36   | 29   | 0    | 23   | 33   | 18  | 59   | 24   | 47   | 7    | 29  | 45  | 31  | 15  |
| k_Bacteria | p_Firmicutes    | c_Clostridia  | o_Clostridiales   | f_Ruminococcaceae    | Unclassified      | Unclassified | 2    | 0    | 0    | 1    | 2    | 0    | 0    | 0    | 0    | 0    | 0   | 3    | 0    | 0    | 0    | 0   | 4   | 2   | 0   |

| Level_1    | Level_2         | Level_3       | Level_4         | Level_5              | Level_6      | Level_7      | ss1<br>0 | sn<br>15 | sn<br>16 | ss<br>19 | sn<br>20 | ss<br>21 | ss<br>25 | sn<br>26 | sn<br>27 | ss2<br>8 | ss2 | ss<br>30 | sn<br>31 | sn<br>35 | sn<br>36 | sn<br>5 | ss<br>6 | ss<br>8 | sn<br>9 |
|------------|-----------------|---------------|-----------------|----------------------|--------------|--------------|----------|----------|----------|----------|----------|----------|----------|----------|----------|----------|-----|----------|----------|----------|----------|---------|---------|---------|---------|
| k_Bacteria | p_Firmicutes    | c_Clostridia  | o_Clostridiales | f_Ruminococaceae     | Unclassified | Unclassified | 1        | 0        | 7        | 0        | 10       | 0        | 8        | 11       | 3        | 0        | 1   | 0        | 0        | 0        | 0        | 1       | 1       | 1       | 0       |
| k_Bacteria | p_Firmicutes    | c_Clostridia  | o_Clostridiales | f_Ruminococaceae     | Unclassified | Unclassified | 18       | 3        | 31       | 3        | 2        | 8        | 3        | 0        | 11       | 6        | 3   | 11       | 11       | 22       | 23       | 6       | 9       | 49      | 7       |
| k_Bacteria | p_Firmicutes    | c_Clostridia  | o_Clostridiales | Unclassified         | Unclassified | Unclassified | 2        | 1        | 3        | 1        | 3        | 1        | 1        | 0        | 8        | 4        | 2   | 2        | 2        | 2        | 5        | 1       | 6       | 11      | 10      |
| k_Bacteria | p_Bacteroidetes | c_Bacteroidia | o_Bacteroidales | Unclassified         | Unclassified | Unclassified | 12       | 1        | 37       | 0        | 0        | 18       | 25       | 0        | 30       | 26       | 8   | 51       | 42       | 0        | 21       | 12      | 0       | 39      | 24      |
| k_Bacteria | p_Firmicutes    | c_Clostridia  | o_Clostridiales | f_Ruminococaceae     | Unclassified | Unclassified | 3        | 0        | 4        | 0        | 15       | 1        | 30       | 6        | 14       | 9        | 1   | 17       | 5        | 7        | 2        | 2       | 5       | 1       | 0       |
| k_Bacteria | p_Firmicutes    | c_Clostridia  | o_Clostridiales | Unclassified         | Unclassified | Unclassified | 42       | 58       | 0        | 80       | 69       | 135      | 79       | 0        | 105      | 20       | 0   | 30       | 23       | 9        | 16       | 41      | 106     | 78      | 40      |
| k_Bacteria | p_Bacteroidetes | Unclassified  | Unclassified    | Unclassified         | Unclassified | Unclassified | 29       | 11       | 4        | 0        | 7        | 23       | 17       | 15       | 16       | 6        | 10  | 3        | 9        | 2        | 0        | 15      | 31      | 45      | 9       |
| k_Bacteria | p_Firmicutes    | c_Clostridia  | o_Clostridiales | Unclassified         | Unclassified | Unclassified | 13       | 3        | 4        | 11       | 5        | 14       | 5        | 13       | 7        | 4        | 6   | 4        | 1        | 15       | 2        | 2       | 11      | 8       | 13      |
| k_Bacteria | p_Firmicutes    | c_Clostridia  | o_Clostridiales | f_[Mogibacteriaceae] | Unclassified | Unclassified | 2        | 1        | 3        | 2        | 3        | 2        | 2        | 4        | 5        | 1        | 2   | 1        | 0        | 16       | 1        | 2       | 2       | 1       | 0       |
| k_Bacteria | p_Bacteroidetes | c_Bacteroidia | o_Bacteroidales | f_Rikenellaceae      | Unclassified | Unclassified | 4        | 4        | 2        | 13       | 3        | 2        | 6        | 26       | 1        | 4        | 6   | 22       | 0        | 6        | 0        | 5       | 2       | 12      | 20      |
| k_Bacteria | p_Bacteroidetes | c_Bacteroidia | o_Bacteroidales | f_S24-7              | Unclassified | Unclassified | 35       | 44       | 70       | 199      | 32       | 54       | 13       | 8        | 49       | 11       | 95  | 53       | 21       | 0        | 26       | 31      | 245     | 90      | 90      |
| k_Bacteria | p_Firmicutes    | c_Clostridia  | o_Clostridiales | f_Ruminococaceae     | Unclassified | Unclassified | 4        | 0        | 1        | 4        | 2        | 4        | 4        | 0        | 4        | 8        | 0   | 2        | 6        | 16       | 4        | 0       | 3       | 0       | 0       |
| k_Bacteria | p_Firmicutes    | c_Clostridia  | o_Clostridiales | f_Ruminococaceae     | Unclassified | Unclassified | 6        | 2        | 5        | 2        | 8        | 10       | 15       | 9        | 17       | 6        | 1   | 9        | 5        | 20       | 6        | 12      | 10      | 0       | 24      |
| k_Bacteria | p_Firmicutes    | c_Clostridia  | o_Clostridiales | f_Lachnospiraceae    | Unclassified | Unclassified | 2        | 0        | 0        | 4        | 0        | 0        | 1        | 0        | 0        | 2        | 0   | 0        | 1        | 2        | 0        | 0       | 0       | 2       | 2       |

| Level_1    | Level_2         | Level_3       | Level_4         | Level_5                | Level_6           | Level_7      | ss1<br>0 | sn<br>15 | sn<br>16 | ss<br>19 | sn<br>20 | ss<br>21 | ss<br>25 | sn<br>26 | sn<br>27 | ss2<br>8 | ss2 | ss<br>30 | sn<br>31 | sn<br>35 | sn<br>36 | sn<br>5 | ss<br>6 | ss<br>8 | sn<br>9 |
|------------|-----------------|---------------|-----------------|------------------------|-------------------|--------------|----------|----------|----------|----------|----------|----------|----------|----------|----------|----------|-----|----------|----------|----------|----------|---------|---------|---------|---------|
| k_Bacteria | p_Firmicutes    | c_Clostridia  | o_Clostridiales | f_Ruminococaceae       | Unclassified      | Unclassified | 15       | 46       | 20       | 56       | 0        | 0        | 3        | 0        | 4        | 0        | 26  | 80       | 10       | 16       | 1        | 0       | 14      | 28      | 16      |
| k_Bacteria | p_Firmicutes    | c_Clostridia  | o_Clostridiales | Unclassified           | Unclassified      | Unclassified | 15       | 7        | 30       | 17       | 14       | 27       | 22       | 12       | 48       | 14       | 10  | 13       | 12       | 27       | 26       | 16      | 4       | 17      | 21      |
| k_Bacteria | p_Bacteroidetes | c_Bacteroidia | o_Bacteroidales | f_S24-7                | Unclassified      | Unclassified | 9        | 27       | 12       | 3        | 21       | 2        | 17       | 9        | 2        | 7        | 6   | 5        | 8        | 4        | 21       | 6       | 10      | 5       | 0       |
| k_Bacteria | p_Bacteroidetes | c_Bacteroidia | o_Bacteroidales | Unclassified           | Unclassified      | Unclassified | 21       | 14       | 38       | 45       | 39       | 34       | 13       | 66       | 11       | 42       | 29  | 22       | 44       | 70       | 11       | 12      | 43      | 10      | 29      |
| k_Bacteria | p_Firmicutes    | c_Clostridia  | o_Clostridiales | f_Ruminococaceae       | Unclassified      | Unclassified | 19       | 68       | 16       | 19       | 14       | 11       | 10       | 17       | 11       | 0        | 0   | 40       | 6        | 3        | 59       | 49      | 0       | 14      | 35      |
| k_Bacteria | p_Bacteroidetes | c_Bacteroidia | o_Bacteroidales | f_[Paraprevotellaceae] | Unclassified      | Unclassified | 1        | 0        | 0        | 9        | 0        | 2        | 0        | 1        | 0        | 1        | 0   | 0        | 3        | 1        | 4        | 3       | 1       | 1       | 1       |
| k_Bacteria | p_Bacteroidetes | c_Bacteroidia | o_Bacteroidales | f_[Paraprevotellaceae] | g_CF231           | Unclassified | 17       | 30       | 21       | 80       | 38       | 89       | 0        | 79       | 20       | 0        | 92  | 20       | 27       | 0        | 0        | 20      | 85      | 18      | 42      |
| k_Bacteria | p_Firmicutes    | c_Clostridia  | o_Clostridiales | Unclassified           | Unclassified      | Unclassified | 19       | 12       | 25       | 13       | 14       | 20       | 10       | 33       | 44       | 4        | 39  | 37       | 45       | 61       | 54       | 36      | 68      | 90      | 13      |
| k_Bacteria | p_Firmicutes    | c_Clostridia  | o_Clostridiales | Unclassified           | Unclassified      | Unclassified | 17       | 0        | 0        | 0        | 3        | 58       | 0        | 0        | 1        | 0        | 1   | 0        | 75       | 1        | 0        | 0       | 14      | 12      | 11      |
| k_Bacteria | p_Bacteroidetes | c_Bacteroidia | o_Bacteroidales | f_[Odoribacteraceae]   | g_Butyricimonas   | Unclassified | 2        | 1        | 0        | 11       | 1        | 7        | 11       | 0        | 9        | 0        | 5   | 16       | 2        | 10       | 9        | 3       | 10      | 4       | 3       |
| k_Bacteria | p_Firmicutes    | c_Clostridia  | o_Clostridiales | Unclassified           | Unclassified      | Unclassified | 2        | 1        | 0        | 3        | 0        | 0        | 0        | 0        | 5        | 0        | 0   | 0        | 1        | 0        | 2        | 0       | 4       | 0       | 5       |
| k_Bacteria | p_Firmicutes    | c_Clostridia  | o_Clostridiales | f_Lachnospiraceae      | g_Coproccus       | Unclassified | 8        | 41       | 0        | 55       | 17       | 38       | 30       | 25       | 25       | 31       | 14  | 7        | 3        | 87       | 2        | 52      | 24      | 49      | 12      |
| k_Bacteria | p_Firmicutes    | c_Clostridia  | o_Clostridiales | Unclassified           | Unclassified      | Unclassified | 25       | 3        | 1        | 2        | 16       | 82       | 30       | 2        | 0        | 0        | 2   | 6        | 16       | 4        | 2        | 5       | 26      | 61      | 45      |
| k_Bacteria | p_Bacteroidetes | c_Bacteroidia | o_Bacteroidales | f_Porphyrornadaceae    | g_Parabacteroides | Unclassified | 11       | 16       | 10       | 8        | 66       | 23       | 0        | 35       | 40       | 0        | 21  | 54       | 21       | 53       | 98       | 14      | 72      | 20      | 26      |

| Level_1    | Level_2         | Level_3           | Level_4              | Level_5               | Level_6        | Level_7      | ss10 | sn15 | sn16 | ss19 | sn20 | ss21 | ss25 | sn26 | sn27 | ss28 | ss2 | ss30 | sn31 | sn35 | sn36 | sn5 | ss6 | ss8 | sn9 |
|------------|-----------------|-------------------|----------------------|-----------------------|----------------|--------------|------|------|------|------|------|------|------|------|------|------|-----|------|------|------|------|-----|-----|-----|-----|
| k_Bacteria | p_Firmicutes    | c_Clostridia      | o_Clostridiales      | f_Ruminococaceae      | g_Oscillospira | Unclassified | 9    | 12   | 31   | 15   | 26   | 14   | 7    | 22   | 6    | 13   | 10  | 26   | 6    | 72   | 36   | 15  | 14  | 30  | 6   |
| k_Bacteria | p_Firmicutes    | c_Clostridia      | o_Clostridiales      | f_Lachnospiraceae     | g_Blautia      | Unclassified | 47   | 0    | 3    | 3    | 26   | 43   | 0    | 1    | 16   | 46   | 2   | 4    | 5    | 1    | 0    | 9   | 0   | 1   | 1   |
| k_Bacteria | p_Bacteroidetes | c_Bacteroidia     | o_Bacteroidales      | f_S24-7               | Unclassified   | Unclassified | 15   | 0    | 0    | 11   | 0    | 0    | 0    | 0    | 0    | 0    | 0   | 0    | 0    | 0    | 0    | 0   | 0   | 37  | 9   |
| k_Bacteria | p_Firmicutes    | c_Clostridia      | o_Clostridiales      | f_Ruminococaceae      | g_Oscillospira | Unclassified | 40   | 19   | 124  | 228  | 79   | 18   | 70   | 44   | 50   | 26   | 31  | 292  | 39   | 133  | 76   | 35  | 37  | 16  | 47  |
| k_Bacteria | p_Firmicutes    | c_Clostridia      | o_Clostridiales      | f_Ruminococaceae      | Unclassified   | Unclassified | 7    | 4    | 11   | 4    | 6    | 7    | 7    | 2    | 16   | 10   | 12  | 12   | 3    | 16   | 16   | 14  | 9   | 5   | 8   |
| k_Bacteria | p_Firmicutes    | c_Clostridia      | o_Clostridiales      | Unclassified          | Unclassified   | Unclassified | 10   | 1    | 7    | 2    | 63   | 62   | 101  | 16   | 117  | 52   | 25  | 5    | 7    | 124  | 9    | 50  | 24  | 16  | 86  |
| k_Bacteria | p_Firmicutes    | c_Clostridia      | o_Clostridiales      | Unclassified          | Unclassified   | Unclassified | 5    | 1    | 13   | 0    | 3    | 3    | 2    | 20   | 0    | 65   | 1   | 0    | 0    | 0    | 2    | 0   | 38  | 63  | 2   |
| k_Bacteria | p_Firmicutes    | c_Clostridia      | o_Clostridiales      | f_Ruminococaceae      | Unclassified   | Unclassified | 2    | 0    | 1    | 0    | 1    | 0    | 1    | 0    | 5    | 0    | 0   | 0    | 0    | 1    | 5    | 1   | 1   | 0   | 0   |
| k_Bacteria | p_Firmicutes    | c_Clostridia      | o_Clostridiales      | f_Lachnospiraceae     | Unclassified   | Unclassified | 3    | 0    | 27   | 1    | 0    | 1    | 0    | 0    | 0    | 0    | 0   | 0    | 2    | 21   | 32   | 75  | 36  | 258 | 9   |
| k_Bacteria | p_Firmicutes    | c_Clostridia      | o_Clostridiales      | f_Lachnospiraceae     | g_Roseburia    | Unclassified | 37   | 252  | 19   | 68   | 15   | 4    | 5    | 0    | 143  | 0    | 23  | 385  | 5    | 3    | 39   | 166 | 4   | 234 | 270 |
| k_Bacteria | p_Firmicutes    | c_Erysipelotrichi | o_Erysipelotrichales | f_Erysipelotrichaceae | g_Allobaculum  | Unclassified | 33   | 5    | 7    | 15   | 1    | 1    | 0    | 22   | 8    | 1    | 0   | 6    | 13   | 0    | 12   | 0   | 10  | 7   | 3   |
| k_Bacteria | p_Bacteroidetes | c_Bacteroidia     | o_Bacteroidales      | f_S24-7               | Unclassified   | Unclassified | 16   | 4    | 6    | 0    | 0    | 2    | 0    | 4    | 0    | 0    | 0   | 0    | 0    | 0    | 0    | 0   | 11  | 0   | 0   |
| k_Bacteria | p_Firmicutes    | c_Clostridia      | o_Clostridiales      | f_Ruminococaceae      | Unclassified   | Unclassified | 3    | 4    | 45   | 11   | 4    | 8    | 6    | 16   | 4    | 3    | 14  | 33   | 5    | 41   | 13   | 10  | 5   | 6   | 2   |
| k_Bacteria | p_Firmicutes    | c_Erysipelotrichi | o_Erysipelotrichales | f_Erysipelotrichaceae | g_RFN20        | Unclassified | 5    | 0    | 0    | 0    | 0    | 2    | 0    | 0    | 1    | 0    | 0   | 1    | 1    | 0    | 0    | 2   | 4   | 2   | 0   |

| Level_1    | Level_2         | Level_3       | Level_4           | Level_5            | Level_6                | Level_7      | ss1<br>0 | sn<br>15 | sn<br>16 | ss<br>19 | sn<br>20 | ss<br>21 | ss<br>25 | sn<br>26 | sn<br>27 | ss2<br>8 | ss2 | ss<br>30 | sn<br>31 | sn<br>35 | sn<br>36 | sn<br>5 | ss<br>6 | ss<br>8 | sn<br>9 |
|------------|-----------------|---------------|-------------------|--------------------|------------------------|--------------|----------|----------|----------|----------|----------|----------|----------|----------|----------|----------|-----|----------|----------|----------|----------|---------|---------|---------|---------|
| k_Bacteria | p_Firmicutes    | c_Clostridia  | o_Clostridiales   | f_Ruminococaceae   | g_Ruminococcus         | Unclassified | 53       | 12       | 2        | 0        | 1        | 0        | 2        | 10       | 3        | 10       | 11  | 1        | 6        | 0        | 6        | 14      | 3       | 0       | 7       |
| k_Bacteria | p_Bacteroidetes | c_Bacteroidia | o_Bacteroidales   | f_Prevotellaceae   | g_Prevotella           | s_copri      | 29       | 51       | 32       | 1        | 73       | 13       | 5        | 24       | 65       | 79       | 61  | 5        | 56       | 2        | 63       | 80      | 15      | 0       | 13      |
| k_Bacteria | p_Firmicutes    | c_Clostridia  | o_Clostridiales   | f_Ruminococaceae   | Unclassified           | Unclassified | 1        | 0        | 0        | 0        | 2        | 1        | 0        | 0        | 0        | 0        | 0   | 0        | 0        | 0        | 0        | 0       | 9       | 3       | 0       |
| k_Bacteria | Unclassified    | Unclassified  | Unclassified      | Unclassified       | Unclassified           | Unclassified | 21       | 0        | 0        | 0        | 0        | 0        | 0        | 0        | 0        | 0        | 0   | 57       | 0        | 0        | 0        | 0       | 0       | 0       | 0       |
| k_Bacteria | p_Firmicutes    | c_Bacilli     | o_Lactobacillales | f_Streptococaceae  | g_Streptococcus        | Unclassified | 2        | 11       | 5        | 1        | 4        | 9        | 5        | 0        | 3        | 6        | 4   | 0        | 0        | 1        | 2        | 10      | 5       | 1       | 2       |
| k_Bacteria | p_Firmicutes    | c_Clostridia  | o_Clostridiales   | f_Ruminococaceae   | Unclassified           | Unclassified | 15       | 3        | 1        | 25       | 15       | 4        | 3        | 16       | 17       | 2        | 3   | 28       | 3        | 7        | 0        | 3       | 16      | 20      | 18      |
| k_Bacteria | p_Bacteroidetes | c_Bacteroidia | o_Bacteroidales   | f_Prevotellaceae   | g_Prevotella           | s_copri      | 7        | 0        | 0        | 0        | 3        | 0        | 6        | 3        | 5        | 3        | 0   | 1        | 2        | 0        | 0        | 4       | 8       | 2       | 0       |
| k_Bacteria | p_Firmicutes    | c_Clostridia  | o_Clostridiales   | f_Ruminococaceae   | Unclassified           | Unclassified | 3        | 0        | 1        | 4        | 0        | 0        | 0        | 0        | 2        | 0        | 4   | 17       | 2        | 2        | 8        | 0       | 2       | 1       | 0       |
| k_Bacteria | p_Firmicutes    | c_Clostridia  | o_Clostridiales   | f_Lachnospiraceae  | g_Coproccoccus         | Unclassified | 44       | 22       | 0        | 7        | 0        | 13       | 1        | 0        | 22       | 22       | 0   | 2        | 7        | 8        | 36       | 21      | 25      | 37      | 11      |
| k_Bacteria | p_Bacteroidetes | c_Bacteroidia | o_Bacteroidales   | f_Prevotellaceae   | g_Prevotella           | Unclassified | 5        | 2        | 3        | 1        | 3        | 6        | 1        | 28       | 5        | 11       | 7   | 9        | 10       | 5        | 10       | 11      | 14      | 13      | 28      |
| k_Bacteria | p_Firmicutes    | c_Clostridia  | o_Clostridiales   | f_Ruminococaceae   | Unclassified           | Unclassified | 35       | 24       | 12       | 12       | 10       | 68       | 32       | 32       | 16       | 59       | 9   | 12       | 18       | 61       | 14       | 47      | 17      | 7       | 21      |
| k_Bacteria | p_Firmicutes    | c_Bacilli     | o_Lactobacillales | f_Lactobacillaceae | g_Lactobacillus        | Unclassified | 27       | 1        | 1        | 0        | 14       | 5        | 14       | 24       | 18       | 57       | 11  | 2        | 16       | 73       | 3        | 54      | 39      | 6       | 16      |
| k_Bacteria | p_Firmicutes    | c_Clostridia  | o_Clostridiales   | f_Veillonellaceae  | g_Phascolartobacterium | Unclassified | 2        | 0        | 0        | 0        | 1        | 7        | 0        | 1        | 1        | 1        | 1   | 1        | 0        | 0        | 0        | 1       | 0       | 1       | 13      |
| k_Bacteria | p_Firmicutes    | c_Clostridia  | o_Clostridiales   | f_Ruminococaceae   | Unclassified           | Unclassified | 9        | 0        | 69       | 1        | 0        | 55       | 66       | 19       | 0        | 4        | 0   | 0        | 17       | 8        | 0        | 28      | 20      | 33      | 1       |

| Level_1    | Level_2          | Level_3               | Level_4             | Level_5              | Level_6        | Level_7      | ss10 | sn15 | sn16 | ss19 | sn20 | ss21 | ss25 | sn26 | sn27 | ss28 | ss2 | ss30 | sn31 | sn35 | sn36 | sn5 | ss6 | ss8 | sn9 |
|------------|------------------|-----------------------|---------------------|----------------------|----------------|--------------|------|------|------|------|------|------|------|------|------|------|-----|------|------|------|------|-----|-----|-----|-----|
| k_Bacteria | p_Bacteroidetes  | c_Bacteroidia         | o_Bacteroidales     | f_S24-7              | Unclassified   | Unclassified | 17   | 4    | 40   | 0    | 8    | 31   | 4    | 57   | 15   | 13   | 4   | 11   | 10   | 45   | 23   | 3   | 16  | 4   | 22  |
| k_Bacteria | p_Bacteroidetes  | c_Bacteroidia         | o_Bacteroidales     | f_S24-7              | Unclassified   | Unclassified | 13   | 5    | 17   | 0    | 1    | 15   | 0    | 3    | 76   | 2    | 1   | 0    | 5    | 0    | 3    | 0   | 6   | 0   | 0   |
| k_Bacteria | p_Bacteroidetes  | c_Bacteroidia         | o_Bacteroidales     | f_Prevotellaceae     | g_Prevotellia  | Unclassified | 21   | 21   | 88   | 72   | 25   | 17   | 14   | 18   | 11   | 37   | 41  | 40   | 25   | 28   | 95   | 13  | 15  | 0   | 14  |
| k_Bacteria | p_Firmicutes     | c_Clostridia          | o_Clostridiales     | f_Lachnospiraceae    | Unclassified   | Unclassified | 20   | 8    | 16   | 86   | 2    | 51   | 35   | 4    | 59   | 11   | 22  | 15   | 23   | 27   | 48   | 97  | 45  | 12  | 22  |
| k_Bacteria | p_Firmicutes     | c_Clostridia          | o_Clostridiales     | f_Lachnospiraceae    | Unclassified   | Unclassified | 5    | 0    | 2    | 10   | 1    | 0    | 12   | 3    | 1    | 0    | 0   | 2    | 2    | 3    | 1    | 1   | 1   | 2   | 0   |
| k_Bacteria | p_Firmicutes     | c_Clostridia          | o_Clostridiales     | f_Lachnospiraceae    | Unclassified   | Unclassified | 13   | 0    | 1    | 0    | 1    | 0    | 12   | 2    | 0    | 1    | 0   | 2    | 0    | 4    | 2    | 0   | 1   | 0   | 0   |
| k_Bacteria | p_Firmicutes     | c_Clostridia          | o_Clostridiales     | f_Peptococcaceae     | Unclassified   | Unclassified | 5    | 2    | 21   | 39   | 0    | 6    | 8    | 1    | 5    | 5    | 8   | 46   | 5    | 36   | 11   | 2   | 11  | 5   | 2   |
| k_Bacteria | p_Firmicutes     | c_Clostridia          | o_Clostridiales     | f_Ruminococcaceae    | g_Oscillospira | Unclassified | 2    | 2    | 1    | 2    | 0    | 1    | 1    | 8    | 3    | 0    | 0   | 17   | 0    | 4    | 8    | 0   | 3   | 1   | 0   |
| k_Bacteria | p_Bacteroidetes  | c_Bacteroidia         | o_Bacteroidales     | f_S24-7              | Unclassified   | Unclassified | 23   | 3    | 16   | 0    | 90   | 3    | 15   | 7    | 6    | 7    | 4   | 2    | 24   | 20   | 14   | 10  | 70  | 7   | 30  |
| k_Bacteria | p_Proteobacteria | c_Gammaproteobacteria | o_Enterobacteriales | f_Enterobacteriaceae | Unclassified   | Unclassified | 6    | 0    | 0    | 3    | 0    | 0    | 0    | 0    | 0    | 0    | 0   | 0    | 0    | 0    | 0    | 0   | 0   | 0   | 0   |
| k_Bacteria | p_Bacteroidetes  | c_Bacteroidia         | o_Bacteroidales     | Unclassified         | Unclassified   | Unclassified | 19   | 0    | 0    | 19   | 4    | 19   | 26   | 0    | 37   | 13   | 15  | 12   | 30   | 28   | 0    | 15  | 88  | 19  | 10  |
| k_Bacteria | p_Firmicutes     | c_Clostridia          | Unclassified        | Unclassified         | Unclassified   | Unclassified | 2    | 2    | 0    | 1    | 3    | 0    | 6    | 2    | 0    | 0    | 0   | 0    | 0    | 0    | 2    | 0   | 12  | 4   | 8   |
| k_Bacteria | p_Firmicutes     | c_Clostridia          | o_Clostridiales     | f_Lachnospiraceae    | Unclassified   | Unclassified | 16   | 2    | 19   | 13   | 5    | 20   | 1    | 0    | 37   | 0    | 12  | 1    | 6    | 11   | 22   | 23  | 10  | 7   | 20  |
| k_Bacteria | p_Firmicutes     | c_Clostridia          | o_Clostridiales     | Unclassified         | Unclassified   | Unclassified | 12   | 0    | 22   | 1    | 2    | 1    | 1    | 3    | 36   | 0    | 14  | 21   | 10   | 0    | 21   | 1   | 93  | 41  | 6   |



| Level_1    | Level_2         | Level_3       | Level_4         | Level_5                | Level_6        | Level_7      | ss10 | sn15 | sn16 | ss19 | sn20 | ss21 | ss25 | sn26 | sn27 | ss28 | ss2  | ss30 | sn31 | sn35 | sn36 | sn5  | ss6 | ss8 | sn9  |
|------------|-----------------|---------------|-----------------|------------------------|----------------|--------------|------|------|------|------|------|------|------|------|------|------|------|------|------|------|------|------|-----|-----|------|
| k_Bacteria | p_Firmicutes    | c_Clostridia  | o_Clostridiales | f_[Mogibacteriaceae]   | Unclassified   | Unclassified | 12   | 3    | 3    | 26   | 11   | 9    | 14   | 23   | 29   | 5    | 3    | 5    | 1    | 11   | 10   | 1    | 4   | 9   | 4    |
| k_Bacteria | p_Bacteroidetes | c_Bacteroidia | o_Bacteroidales | f_[Paraprevotellaceae] | g_[Prevotella] | Unclassified | 2    | 1700 | 1047 | 17   | 112  | 730  | 1563 | 1842 | 1390 | 1699 | 1832 | 1792 | 905  | 5197 | 2027 | 1580 | 835 | 836 | 2941 |
| k_Bacteria | Unclassified    | Unclassified  | Unclassified    | Unclassified           | Unclassified   | Unclassified | 8    | 0    | 3    | 0    | 13   | 7    | 14   | 6    | 12   | 4    | 2    | 8    | 2    | 45   | 20   | 4    | 29  | 20  | 3    |
| k_Bacteria | p_Firmicutes    | c_Clostridia  | o_Clostridiales | f_Lachnospiraceae      | g_Blautia      | Unclassified | 7    | 15   | 1    | 0    | 1    | 26   | 5    | 5    | 7    | 1    | 1    | 3    | 6    | 11   | 1    | 2    | 6   | 6   | 3    |
| k_Bacteria | p_Bacteroidetes | c_Bacteroidia | o_Bacteroidales | Unclassified           | Unclassified   | Unclassified | 17   | 3    | 6    | 0    | 0    | 2    | 0    | 0    | 4    | 0    | 1    | 5    | 2    | 3    | 0    | 0    | 0   | 0   | 0    |
| k_Bacteria | p_Firmicutes    | c_Clostridia  | o_Clostridiales | f_Lachnospiraceae      | Unclassified   | Unclassified | 9    | 8    | 3    | 0    | 15   | 31   | 0    | 0    | 5    | 0    | 1    | 0    | 1    | 0    | 0    | 0    | 0   | 3   | 1    |
| k_Bacteria | p_Bacteroidetes | c_Bacteroidia | o_Bacteroidales | f_Prevotellaceae       | g_Prevotella   | s_copri      | 3    | 5    | 0    | 2    | 2    | 5    | 0    | 0    | 1    | 8    | 1    | 1    | 0    | 0    | 5    | 2    | 0   | 0   | 0    |
| k_Bacteria | p_Firmicutes    | c_Clostridia  | o_Clostridiales | Unclassified           | Unclassified   | Unclassified | 2    | 0    | 1    | 0    | 0    | 1    | 2    | 0    | 0    | 0    | 0    | 0    | 1    | 2    | 2    | 0    | 1   | 1   | 0    |
| k_Bacteria | p_Bacteroidetes | c_Bacteroidia | o_Bacteroidales | f_Prevotellaceae       | g_Prevotella   | s_copri      | 15   | 23   | 17   | 2    | 33   | 35   | 1    | 14   | 17   | 29   | 32   | 6    | 20   | 1    | 27   | 26   | 14  | 0   | 6    |
| k_Bacteria | p_Firmicutes    | c_Clostridia  | o_Clostridiales | Unclassified           | Unclassified   | Unclassified | 14   | 24   | 34   | 0    | 3    | 7    | 9    | 17   | 25   | 7    | 17   | 15   | 8    | 0    | 1    | 20   | 6   | 38  | 5    |
| k_Bacteria | p_Cyanobacteria | c_4C0d-2      | o_YS2           | Unclassified           | Unclassified   | Unclassified | 9    | 0    | 37   | 0    | 0    | 0    | 0    | 0    | 0    | 1    | 0    | 235  | 0    | 0    | 0    | 9    | 3   | 0   | 7    |
| k_Bacteria | p_Firmicutes    | c_Clostridia  | o_Clostridiales | f_Lachnospiraceae      | g_Coproccus    | Unclassified | 30   | 5    | 0    | 0    | 9    | 1    | 0    | 0    | 0    | 2    | 0    | 1    | 11   | 3    | 0    | 0    | 0   | 3   | 0    |
| k_Bacteria | p_Bacteroidetes | c_Bacteroidia | o_Bacteroidales | f_S24-7                | Unclassified   | Unclassified | 19   | 4    | 135  | 0    | 26   | 6    | 8    | 1    | 76   | 64   | 14   | 37   | 39   | 6    | 105  | 5    | 76  | 0   | 15   |
| k_Bacteria | p_Bacteroidetes | c_Bacteroidia | o_Bacteroidales | f_Prevotellaceae       | g_Prevotella   | Unclassified | 3    | 0    | 0    | 0    | 1    | 1    | 0    | 0    | 1    | 2    | 0    | 1    | 1    | 0    | 1    | 2    | 0   | 2   | 2    |

| Level_1    | Level_2          | Level_3               | Level_4              | Level_5                | Level_6          | Level_7      | ss10 | sn15 | sn16 | ss19 | sn20 | ss21 | ss25 | sn26 | sn27 | ss28 | ss2 | ss30 | sn31 | sn35 | sn36 | sn5 | ss6 | ss8 | sn9 |
|------------|------------------|-----------------------|----------------------|------------------------|------------------|--------------|------|------|------|------|------|------|------|------|------|------|-----|------|------|------|------|-----|-----|-----|-----|
| k_Bacteria | p_Firmicutes     | c_Clostridia          | o_Clostridiales      | Unclassified           | Unclassified     | Unclassified | 12   | 1    | 76   | 162  | 4    | 1    | 7    | 123  | 3    | 21   | 34  | 91   | 3    | 17   | 102  | 116 | 0   | 246 | 61  |
| k_Bacteria | p_Bacteroidetes  | c_Bacteroidia         | o_Bacteroidales      | Unclassified           | Unclassified     | Unclassified | 19   | 1    | 0    | 2    | 0    | 3    | 0    | 0    | 1    | 7    | 4   | 6    | 1    | 10   | 1    | 1   | 12  | 3   | 1   |
| k_Bacteria | p_Proteobacteria | c_Deltaproteobacteria | o_Desulfotribionales | f_Desulfotribionaceae  | Unclassified     | Unclassified | 7    | 0    | 0    | 3    | 2    | 8    | 4    | 0    | 11   | 2    | 4   | 7    | 3    | 13   | 10   | 4   | 1   | 6   | 0   |
| k_Bacteria | p_Firmicutes     | c_Clostridia          | o_Clostridiales      | f_Ruminococcaceae      | g_Ruminococcus   | Unclassified | 2    | 0    | 0    | 0    | 0    | 3    | 5    | 0    | 4    | 0    | 0   | 3    | 2    | 0    | 0    | 0   | 0   | 1   | 0   |
| k_Bacteria | p_Firmicutes     | c_Clostridia          | o_Clostridiales      | f_Lachnospiraceae      | Unclassified     | Unclassified | 8    | 0    | 1    | 0    | 0    | 4    | 1    | 0    | 9    | 0    | 6   | 3    | 2    | 2    | 4    | 0   | 4   | 0   | 2   |
| k_Bacteria | p_Firmicutes     | c_Clostridia          | o_Clostridiales      | Unclassified           | Unclassified     | Unclassified | 6    | 2    | 0    | 6    | 0    | 8    | 6    | 131  | 13   | 2    | 10  | 323  | 4    | 6    | 36   | 8   | 1   | 24  | 5   |
| k_Bacteria | p_Firmicutes     | Unclassified          | Unclassified         | Unclassified           | Unclassified     | Unclassified | 9    | 11   | 0    | 6    | 4    | 33   | 0    | 0    | 37   | 0    | 11  | 2    | 1    | 15   | 0    | 2   | 14  | 1   | 12  |
| k_Bacteria | p_Bacteroidetes  | c_Bacteroidia         | o_Bacteroidales      | f_[Paraprevotellaceae] | Unclassified     | Unclassified | 2    | 1    | 2    | 0    | 2    | 1    | 0    | 0    | 0    | 2    | 1   | 0    | 1    | 0    | 0    | 0   | 0   | 0   | 0   |
| k_Bacteria | p_Firmicutes     | c_Clostridia          | o_Clostridiales      | f_Ruminococcaceae      | g_Ruminococcus   | Unclassified | 2    | 1    | 0    | 0    | 1    | 0    | 0    | 0    | 0    | 0    | 0   | 2    | 1    | 0    | 0    | 0   | 2   | 3   | 1   |
| k_Bacteria | p_Firmicutes     | c_Clostridia          | o_Clostridiales      | f_Ruminococcaceae      | g_Oscillospira   | Unclassified | 2    | 1    | 11   | 13   | 0    | 4    | 4    | 0    | 0    | 0    | 0   | 16   | 2    | 5    | 2    | 0   | 0   | 3   | 0   |
| k_Bacteria | p_Proteobacteria | c_Deltaproteobacteria | o_Desulfotribionales | f_Desulfotribionaceae  | g_Desulfotribrio | Unclassified | 3    | 5    | 37   | 16   | 1    | 10   | 2    | 7    | 21   | 5    | 5   | 86   | 7    | 33   | 15   | 5   | 19  | 2   | 2   |
| k_Bacteria | p_Firmicutes     | c_Clostridia          | o_Clostridiales      | f_Ruminococcaceae      | Unclassified     | Unclassified | 3    | 1    | 2    | 6    | 1    | 2    | 1    | 0    | 0    | 20   | 0   | 1    | 0    | 0    | 3    | 3   | 14  | 5   | 0   |
| k_Bacteria | p_Bacteroidetes  | c_Bacteroidia         | o_Bacteroidales      | f_S24-7                | Unclassified     | Unclassified | 4    | 117  | 91   | 199  | 0    | 52   | 0    | 0    | 234  | 1    | 292 | 172  | 5    | 0    | 24   | 0   | 112 | 0   | 43  |
| k_Bacteria | p_Firmicutes     | c_Clostridia          | o_Clostridiales      | f_Ruminococcaceae      | g_Ruminococcus   | Unclassified | 1    | 0    | 0    | 1    | 0    | 0    | 0    | 0    | 0    | 0    | 0   | 0    | 0    | 72   | 0    | 2   | 5   | 2   | 0   |

| Level_1    | Level_2         | Level_3           | Level_4              | Level_5                | Level_6         | Level_7      | ss1<br>0 | sn<br>15 | sn<br>16 | ss<br>19 | sn<br>20 | ss<br>21 | ss<br>25 | sn<br>26 | sn<br>27 | ss2<br>8 | ss2 | ss<br>30 | sn<br>31 | sn<br>35 | sn<br>36 | sn<br>5 | ss<br>6 | ss<br>8 | sn<br>9 |
|------------|-----------------|-------------------|----------------------|------------------------|-----------------|--------------|----------|----------|----------|----------|----------|----------|----------|----------|----------|----------|-----|----------|----------|----------|----------|---------|---------|---------|---------|
| k_Bacteria | p_Firmicutes    | c_Clostridia      | o_Clostridiales      | f_Ruminococaceae       | Unclassified    | Unclassified | 2        | 0        | 7        | 12       | 0        | 0        | 4        | 0        | 0        | 1        | 1   | 14       | 2        | 13       | 1        | 1       | 2       | 0       | 3       |
| k_Bacteria | p_Bacteroidetes | c_Bacteroidia     | o_Bacteroidales      | f_S24-7                | Unclassified    | Unclassified | 29       | 3        | 60       | 42       | 42       | 15       | 11       | 10       | 34       | 24       | 18  | 66       | 15       | 17       | 8        | 48      | 16      | 41      | 6       |
| k_Bacteria | p_Cyanobacteria | c_4C0d-2          | o_YS2                | Unclassified           | Unclassified    | Unclassified | 33       | 52       | 44       | 81       | 58       | 0        | 39       | 0        | 6        | 321      | 0   | 55       | 0        | 263      | 28       | 504     | 44      | 53      | 9       |
| k_Bacteria | p_Lentisphaerae | c_[Lentisphaeria] | o_Victivales         | f_Victivallaceae       | Unclassified    | Unclassified | 12       | 2        | 3        | 0        | 2        | 1        | 12       | 0        | 4        | 1        | 6   | 13       | 6        | 12       | 2        | 1       | 11      | 24      | 0       |
| k_Bacteria | p_Firmicutes    | c_Clostridia      | o_Clostridiales      | Unclassified           | Unclassified    | Unclassified | 7        | 0        | 1        | 0        | 1        | 8        | 0        | 7        | 7        | 0        | 24  | 9        | 0        | 0        | 0        | 11      | 6       | 6       | 0       |
| k_Bacteria | p_Firmicutes    | c_Clostridia      | o_Clostridiales      | f_Peptococaceae        | g_rc4-4         | Unclassified | 7        | 27       | 1        | 14       | 90       | 46       | 2        | 14       | 54       | 33       | 16  | 5        | 7        | 30       | 26       | 39      | 6       | 14      | 45      |
| k_Bacteria | p_Firmicutes    | c_Erysipelotrichi | o_Erysipelotrichales | f_Erysipelotrichaceae  | g_Allobaculum   | Unclassified | 18       | 2        | 0        | 16       | 0        | 0        | 0        | 29       | 17       | 0        | 1   | 0        | 3        | 2        | 5        | 0       | 1       | 1       | 0       |
| k_Bacteria | p_Firmicutes    | c_Clostridia      | o_Clostridiales      | f_Ruminococaceae       | Unclassified    | Unclassified | 2        | 4        | 2        | 6        | 2        | 1        | 3        | 10       | 1        | 0        | 0   | 20       | 0        | 2        | 2        | 0       | 4       | 0       | 0       |
| k_Bacteria | p_Bacteroidetes | c_Bacteroidia     | o_Bacteroidales      | f_[Paraprevotellaceae] | g_CF231         | Unclassified | 2        | 1        | 0        | 0        | 1        | 0        | 1        | 0        | 0        | 1        | 1   | 2        | 1        | 0        | 0        | 0       | 1       | 0       | 0       |
| k_Bacteria | p_Firmicutes    | c_Clostridia      | o_Clostridiales      | f_Clostridiaceae       | g_Clostridium   | Unclassified | 3        | 9        | 12       | 0        | 14       | 52       | 49       | 122      | 94       | 13       | 1   | 123      | 21       | 5        | 4        | 116     | 1       | 25      | 43      |
| k_Bacteria | p_Firmicutes    | c_Clostridia      | o_Clostridiales      | f_Ruminococaceae       | g_Oscillospira  | Unclassified | 7        | 2        | 32       | 39       | 2        | 6        | 8        | 4        | 2        | 3        | 1   | 42       | 4        | 10       | 3        | 0       | 4       | 3       | 0       |
| k_Bacteria | p_Firmicutes    | c_Bacilli         | o_Lactobacillales    | f_Lactobacillaceae     | g_Lactobacillus | Unclassified | 7        | 2        | 0        | 0        | 5        | 2        | 22       | 5        | 3        | 14       | 44  | 1        | 2        | 21       | 0        | 13      | 5       | 0       | 4       |
| k_Bacteria | p_Bacteroidetes | c_Bacteroidia     | o_Bacteroidales      | f_Rikenellaceae        | Unclassified    | Unclassified | 2        | 0        | 1        | 0        | 0        | 1        | 0        | 0        | 7        | 0        | 0   | 0        | 2        | 0        | 0        | 0       | 0       | 1       | 0       |
| k_Bacteria | p_Bacteroidetes | c_Bacteroidia     | o_Bacteroidales      | f_S24-7                | Unclassified    | Unclassified | 8        | 53       | 21       | 33       | 68       | 22       | 6        | 261      | 67       | 27       | 61  | 121      | 41       | 151      | 52       | 11      | 78      | 77      | 102     |

| Level_1    | Level_2          | Level_3          | Level_4           | Level_5               | Level_6          | Level_7      | ss10 | sn15 | sn16 | ss19 | sn20 | ss21 | ss25 | sn26 | sn27 | ss28 | ss2 | ss30 | sn31 | sn35 | sn36 | sn5 | ss6 | ss8 | sn9 |
|------------|------------------|------------------|-------------------|-----------------------|------------------|--------------|------|------|------|------|------|------|------|------|------|------|-----|------|------|------|------|-----|-----|-----|-----|
| k_Bacteria | p_Firmicutes     | c_Clostridia     | o_Clostridiales   | Unclassified          | Unclassified     | Unclassified | 18   | 0    | 0    | 0    | 0    | 14   | 7    | 0    | 13   | 1    | 1   | 0    | 3    | 13   | 3    | 12  | 18  | 23  | 7   |
| k_Bacteria | p_Firmicutes     | c_Clostridia     | o_Clostridiales   | f_Lachnospiraceae     | Unclassified     | Unclassified | 5    | 4    | 4    | 3    | 11   | 8    | 1    | 3    | 14   | 6    | 4   | 1    | 2    | 5    | 9    | 4   | 5   | 4   | 13  |
| k_Bacteria | p_Firmicutes     | c_Clostridia     | o_Clostridiales   | f_[Mogibacteriaceae]  | Unclassified     | Unclassified | 9    | 2    | 1    | 38   | 8    | 5    | 3    | 0    | 7    | 1    | 3   | 34   | 3    | 2    | 1    | 4   | 10  | 5   | 5   |
| k_Bacteria | p_Firmicutes     | c_Clostridia     | o_Clostridiales   | f_Lachnospiraceae     | g_[Ruminococcus] | s_gnavus     | 5    | 2    | 4    | 18   | 14   | 1    | 9    | 7    | 2    | 2    | 0   | 6    | 2    | 3    | 0    | 9   | 5   | 23  | 4   |
| k_Bacteria | p_Firmicutes     | c_Clostridia     | o_Clostridiales   | f_Lachnospiraceae     | Unclassified     | Unclassified | 8    | 1    | 0    | 5    | 0    | 0    | 0    | 1    | 0    | 0    | 0   | 0    | 0    | 0    | 2    | 0   | 0   | 2   | 0   |
| k_Bacteria | p_Bacteroidetes  | c_Bacteroidia    | o_Bacteroidales   | f_Prevotellaceae      | g_Prevotella     | s_copri      | 10   | 8    | 14   | 4    | 8    | 11   | 1    | 15   | 8    | 7    | 13  | 1    | 5    | 0    | 3    | 10  | 11  | 1   | 3   |
| k_Bacteria | p_Firmicutes     | c_Clostridia     | o_Clostridiales   | f_Ruminococcaceae     | Unclassified     | Unclassified | 8    | 1    | 1    | 0    | 4    | 2    | 7    | 1    | 15   | 1    | 1   | 3    | 0    | 0    | 1    | 1   | 1   | 2   | 5   |
| k_Bacteria | p_Firmicutes     | c_Clostridia     | o_Clostridiales   | f_Christensenellaceae | Unclassified     | Unclassified | 19   | 7    | 23   | 15   | 16   | 13   | 19   | 0    | 25   | 6    | 13  | 22   | 16   | 39   | 16   | 12  | 12  | 24  | 20  |
| k_Bacteria | p_Actinobacteria | c_Actinobacteria | o_Actinomycetales | f_Micrococcaeae       | g_Rothia         | Unclassified | 1    | 1    | 2    | 0    | 0    | 1    | 1    | 1    | 0    | 0    | 0   | 2    | 0    | 0    | 0    | 5   | 3   | 2   | 1   |
| k_Bacteria | p_Tenericutes    | c_Mollicutes     | o_RF39            | Unclassified          | Unclassified     | Unclassified | 5    | 4    | 5    | 2    | 1    | 5    | 5    | 1    | 23   | 6    | 3   | 5    | 4    | 25   | 17   | 9   | 21  | 10  | 2   |
| k_Bacteria | p_Firmicutes     | c_Clostridia     | o_Clostridiales   | f_[Mogibacteriaceae]  | Unclassified     | Unclassified | 1    | 1    | 0    | 0    | 2    | 1    | 2    | 0    | 1    | 5    | 0   | 0    | 0    | 1    | 1    | 0   | 0   | 0   | 0   |
| k_Bacteria | p_Firmicutes     | c_Clostridia     | o_Clostridiales   | Unclassified          | Unclassified     | Unclassified | 1    | 1    | 3    | 3    | 2    | 1    | 3    | 4    | 5    | 6    | 5   | 0    | 1    | 2    | 3    | 0   | 3   | 1   | 2   |
| k_Bacteria | p_Firmicutes     | c_Clostridia     | o_Clostridiales   | f_Lachnospiraceae     | Unclassified     | Unclassified | 3    | 1    | 9    | 7    | 3    | 22   | 12   | 1    | 1    | 5    | 2   | 12   | 0    | 0    | 0    | 6   | 50  | 8   | 0   |
| k_Bacteria | p_Bacteroidetes  | c_Bacteroidia    | o_Bacteroidales   | Unclassified          | Unclassified     | Unclassified | 3    | 11   | 24   | 39   | 5    | 12   | 13   | 0    | 14   | 0    | 33  | 55   | 10   | 0    | 0    | 2   | 5   | 25  | 5   |

| Level_1    | Level_2           | Level_3               | Level_4              | Level_5               | Level_6           | Level_7      | ss10 | sn15 | sn16 | ss19 | sn20 | ss21 | ss25 | sn26 | sn27 | ss28 | ss2 | ss30 | sn31 | sn35 | sn36 | sn5 | ss6 | ss8 | sn9 |
|------------|-------------------|-----------------------|----------------------|-----------------------|-------------------|--------------|------|------|------|------|------|------|------|------|------|------|-----|------|------|------|------|-----|-----|-----|-----|
| k_Bacteria | p_Bacteroidetes   | c_Bacteroidia         | o_Bacteroidales      | f_Prevotellaceae      | g_Prevotellae     | s_copri      | 9    | 2    | 2    | 3    | 23   | 14   | 0    | 0    | 6    | 25   | 4   | 1    | 7    | 0    | 7    | 1   | 1   | 0   | 3   |
| k_Bacteria | p_Firmicutes      | c_Clostridia          | o_Clostridiales      | f_Lachnospiraceae     | Unclassified      | Unclassified | 7    | 13   | 12   | 4    | 1    | 4    | 1    | 4    | 2    | 0    | 0   | 36   | 1    | 23   | 2    | 2   | 2   | 4   | 5   |
| k_Bacteria | p_Proteobacteria  | c_Deltaproteobacteria | o_Desulfotribionales | f_Desulfotribionaceae | Unclassified      | Unclassified | 5    | 2    | 41   | 66   | 2    | 9    | 7    | 0    | 48   | 2    | 3   | 87   | 8    | 63   | 16   | 4   | 15  | 15  | 9   |
| k_Bacteria | p_Bacteroidetes   | c_Bacteroidia         | o_Bacteroidales      | f_Bacteroidaceae      | g_Bacteroides     | Unclassified | 7    | 0    | 0    | 65   | 11   | 0    | 36   | 0    | 7    | 51   | 0   | 7    | 31   | 0    | 0    | 45  | 0   | 0   | 0   |
| k_Bacteria | p_Firmicutes      | c_Clostridia          | o_Clostridiales      | f_Dehalobacteriaceae  | g_Dehalobacterium | Unclassified | 2    | 1    | 0    | 0    | 0    | 0    | 0    | 0    | 1    | 0    | 1   | 0    | 0    | 5    | 0    | 1   | 1   | 0   | 0   |
| k_Bacteria | p_Firmicutes      | c_Clostridia          | o_Clostridiales      | Unclassified          | Unclassified      | Unclassified | 12   | 11   | 52   | 29   | 47   | 15   | 11   | 29   | 29   | 10   | 16  | 33   | 11   | 46   | 17   | 14  | 58  | 16  | 19  |
| k_Bacteria | p_Proteobacteria  | Unclassified          | Unclassified         | Unclassified          | Unclassified      | Unclassified | 10   | 0    | 0    | 5    | 11   | 1    | 9    | 0    | 9    | 79   | 17  | 7    | 7    | 0    | 0    | 22  | 9   | 13  | 4   |
| k_Bacteria | p_Firmicutes      | c_Clostridia          | o_Clostridiales      | f_Ruminococcaceae     | Unclassified      | Unclassified | 6    | 14   | 35   | 27   | 10   | 1    | 12   | 24   | 5    | 4    | 3   | 39   | 6    | 60   | 11   | 4   | 10  | 9   | 9   |
| k_Bacteria | p_Bacteroidetes   | c_Bacteroidia         | o_Bacteroidales      | Unclassified          | Unclassified      | Unclassified | 8    | 4    | 10   | 18   | 6    | 30   | 4    | 47   | 17   | 33   | 19  | 60   | 31   | 45   | 61   | 6   | 42  | 37  | 31  |
| k_Bacteria | p_Firmicutes      | c_Clostridia          | o_Clostridiales      | Unclassified          | Unclassified      | Unclassified | 2    | 0    | 22   | 0    | 2    | 0    | 0    | 1    | 12   | 2    | 0   | 0    | 16   | 12   | 12   | 15  | 3   | 8   | 10  |
| k_Bacteria | Unclassified      | Unclassified          | Unclassified         | Unclassified          | Unclassified      | Unclassified | 1    | 0    | 3    | 0    | 0    | 0    | 0    | 0    | 0    | 1    | 0   | 1    | 0    | 4    | 0    | 0   | 1   | 3   | 0   |
| k_Bacteria | p_Firmicutes      | c_Clostridia          | o_Clostridiales      | Unclassified          | Unclassified      | Unclassified | 9    | 3    | 37   | 12   | 5    | 0    | 0    | 26   | 14   | 1    | 14  | 15   | 3    | 2    | 2    | 27  | 0   | 4   | 1   |
| k_Bacteria | p_Firmicutes      | c_Clostridia          | o_Clostridiales      | f_Ruminococcaceae     | Unclassified      | Unclassified | 10   | 0    | 0    | 0    | 0    | 8    | 0    | 0    | 19   | 0    | 6   | 3    | 0    | 0    | 2    | 4   | 0   | 0   | 0   |
| k_Bacteria | p_Verrucomicrobia | c_Verrucomicrobia     | o_WCHB1-41           | f_RFP12               | Unclassified      | Unclassified | 1    | 0    | 0    | 0    | 0    | 1    | 0    | 0    | 1    | 0    | 0   | 4    | 2    | 0    | 0    | 0   | 1   | 2   | 0   |

| Level_1    | Level_2         | Level_3       | Level_4         | Level_5              | Level_6        | Level_7      | ss1<br>0 | sn<br>15 | sn<br>16 | ss<br>19 | sn<br>20 | ss<br>21 | ss<br>25 | sn<br>26 | sn<br>27 | ss2<br>8 | ss2 | ss<br>30 | sn<br>31 | sn<br>35 | sn<br>36 | sn<br>5 | ss<br>6 | ss<br>8 | sn<br>9 |
|------------|-----------------|---------------|-----------------|----------------------|----------------|--------------|----------|----------|----------|----------|----------|----------|----------|----------|----------|----------|-----|----------|----------|----------|----------|---------|---------|---------|---------|
| k_Bacteria | p_Firmicutes    | c_Clostridia  | o_Clostridiales | f_Ruminococaceae     | Unclassified   | Unclassified | 1        | 1        | 2        | 11       | 0        | 1        | 0        | 18       | 1        | 1        | 0   | 7        | 0        | 1        | 1        | 0       | 0       | 4       | 0       |
| k_Bacteria | p_Firmicutes    | c_Clostridia  | o_Clostridiales | f_Lachnospiraceae    | g_Coproccus    | Unclassified | 11       | 6        | 25       | 37       | 0        | 13       | 26       | 5        | 6        | 8        | 5   | 99       | 14       | 7        | 3        | 6       | 46      | 19      | 7       |
| k_Bacteria | p_Bacteroidetes | c_Bacteroidia | o_Bacteroidales | Unclassified         | Unclassified   | Unclassified | 8        | 6        | 0        | 127      | 18       | 40       | 0        | 0        | 23       | 0        | 6   | 63       | 8        | 9        | 88       | 25      | 58      | 11      | 15      |
| k_Bacteria | p_Bacteroidetes | c_Bacteroidia | o_Bacteroidales | f_Prevotellaceae     | g_Prevotella   | s_copri      | 5        | 4        | 1        | 64       | 14       | 8        | 7        | 14       | 0        | 15       | 5   | 3        | 2        | 6        | 7        | 10      | 12      | 20      | 16      |
| k_Bacteria | p_Bacteroidetes | c_Bacteroidia | o_Bacteroidales | f_[Odoribacteraceae] | g_Odoribacter  | Unclassified | 5        | 2        | 3        | 5        | 0        | 0        | 3        | 11       | 0        | 0        | 5   | 14       | 1        | 5        | 1        | 0       | 11      | 1       | 0       |
| k_Bacteria | p_Firmicutes    | c_Bacilli     | o_Gemellales    | f_Gemellaceae        | Unclassified   | Unclassified | 1        | 0        | 0        | 1        | 0        | 0        | 0        | 0        | 0        | 1        | 0   | 0        | 0        | 2        | 0        | 1       | 1       | 0       | 1       |
| k_Bacteria | p_Bacteroidetes | c_Bacteroidia | o_Bacteroidales | f_Prevotellaceae     | g_Prevotella   | Unclassified | 27       | 0        | 0        | 0        | 0        | 0        | 43       | 2        | 11       | 0        | 4   | 9        | 24       | 142      | 172      | 27      | 12      | 1       | 2       |
| k_Bacteria | p_Firmicutes    | c_Clostridia  | o_Clostridiales | f_Ruminococaceae     | g_Ruminococcus | s_bromii     | 4        | 0        | 0        | 3        | 46       | 0        | 47       | 0        | 0        | 31       | 0   | 2        | 6        | 6        | 0        | 7       | 3       | 2       | 10      |
| k_Bacteria | p_Firmicutes    | c_Clostridia  | o_Clostridiales | Unclassified         | Unclassified   | Unclassified | 4        | 1        | 8        | 4        | 1        | 5        | 1        | 4        | 0        | 0        | 2   | 45       | 1        | 1        | 1        | 1       | 1       | 2       | 2       |
| k_Bacteria | p_Firmicutes    | c_Clostridia  | o_Clostridiales | f_Ruminococaceae     | Unclassified   | Unclassified | 9        | 8        | 4        | 11       | 0        | 33       | 0        | 0        | 3        | 1        | 0   | 1        | 0        | 31       | 1        | 5       | 14      | 21      | 2       |
| k_Bacteria | p_Bacteroidetes | c_Bacteroidia | o_Bacteroidales | f_Prevotellaceae     | g_Prevotella   | s_copri      | 15       | 14       | 9        | 2        | 45       | 38       | 0        | 15       | 13       | 37       | 26  | 2        | 15       | 1        | 21       | 37      | 7       | 0       | 6       |
| k_Bacteria | p_Firmicutes    | c_Clostridia  | o_Clostridiales | f_Ruminococaceae     | Unclassified   | Unclassified | 2        | 0        | 6        | 10       | 1        | 2        | 3        | 5        | 0        | 1        | 2   | 3        | 3        | 3        | 1        | 0       | 4       | 3       | 2       |
| k_Bacteria | p_Bacteroidetes | c_Bacteroidia | o_Bacteroidales | f_Prevotellaceae     | g_Prevotella   | Unclassified | 1        | 2        | 1        | 4        | 7        | 1        | 8        | 4        | 8        | 5        | 1   | 3        | 2        | 8        | 4        | 1       | 2       | 6       | 4       |
| k_Bacteria | p_Firmicutes    | c_Clostridia  | o_Clostridiales | f_Lachnospiraceae    | Unclassified   | Unclassified | 3        | 23       | 1059     | 890      | 19       | 16       | 2        | 0        | 352      | 0        | 38  | 56       | 6        | 248      | 250      | 138     | 1       | 95      | 5       |

| Level_1    | Level_2          | Level_3          | Level_4            | Level_5                | Level_6        | Level_7      | ss1 | sn  | sn  | ss  | sn | ss  | ss  | sn  | sn  | ss2 | ss2 | ss  | sn  | sn  | sn | ss  | ss  | sn   |     |
|------------|------------------|------------------|--------------------|------------------------|----------------|--------------|-----|-----|-----|-----|----|-----|-----|-----|-----|-----|-----|-----|-----|-----|----|-----|-----|------|-----|
| k_Bacteria | p_Firmicutes     | c_Clostridia     | o_Clostridiales    | f_Ruminococaceae       | g_Oscillospira | Unclassified | 1   | 0   | 9   | 4   | 2  | 5   | 0   | 3   | 3   | 3   | 11  | 9   | 1   | 71  | 11 | 0   | 4   | 0    | 6   |
| k_Bacteria | p_Bacteroidetes  | c_Bacteroidia    | o_Bacteroidales    | f_S24-7                | Unclassified   | Unclassified | 10  | 0   | 10  | 94  | 14 | 4   | 41  | 0   | 24  | 17  | 33  | 19  | 2   | 277 | 57 | 27  | 93  | 17   | 13  |
| k_Bacteria | p_Firmicutes     | c_Clostridia     | o_Clostridiales    | f_Ruminococaceae       | g_Ruminococcus | Unclassified | 1   | 0   | 0   | 22  | 10 | 7   | 39  | 4   | 0   | 0   | 5   | 5   | 2   | 12  | 1  | 24  | 15  | 32   | 5   |
| k_Bacteria | Unclassified     | Unclassified     | Unclassified       | Unclassified           | Unclassified   | Unclassified | 4   | 3   | 8   | 27  | 0  | 0   | 0   | 0   | 0   | 1   | 0   | 233 | 1   | 0   | 5  | 1   | 7   | 57   | 32  |
| k_Bacteria | p_Firmicutes     | c_Clostridia     | o_Clostridiales    | Unclassified           | Unclassified   | Unclassified | 7   | 0   | 2   | 126 | 0  | 7   | 0   | 103 | 0   | 0   | 0   | 10  | 1   | 1   | 34 | 2   | 1   | 67   | 20  |
| k_Bacteria | p_Firmicutes     | c_Clostridia     | o_Clostridiales    | f_Ruminococaceae       | g_Ruminococcus | Unclassified | 2   | 5   | 10  | 11  | 2  | 1   | 0   | 3   | 3   | 0   | 0   | 67  | 5   | 16  | 2  | 5   | 10  | 8    | 4   |
| k_Bacteria | p_Actinobacteria | c_Coriobacteriia | o_Coriobacteriales | f_Coriobacteriaceae    | Unclassified   | Unclassified | 2   | 0   | 0   | 1   | 0  | 0   | 0   | 0   | 0   | 1   | 0   | 0   | 0   | 1   | 0  | 0   | 0   | 0    | 0   |
| k_Bacteria | p_Firmicutes     | c_Clostridia     | o_Clostridiales    | f_Ruminococaceae       | g_Oscillospira | Unclassified | 9   | 11  | 90  | 69  | 11 | 11  | 158 | 20  | 13  | 13  | 36  | 48  | 17  | 178 | 89 | 12  | 115 | 31   | 28  |
| k_Bacteria | p_Firmicutes     | c_Clostridia     | o_Clostridiales    | f_Lachnospiraceae      | Unclassified   | Unclassified | 1   | 6   | 2   | 0   | 3  | 10  | 0   | 0   | 1   | 4   | 5   | 11  | 1   | 7   | 2  | 1   | 3   | 0    | 0   |
| k_Bacteria | p_Firmicutes     | c_Clostridia     | o_Clostridiales    | f_Ruminococaceae       | g_Ruminococcus | Unclassified | 6   | 17  | 32  | 13  | 3  | 4   | 11  | 24  | 47  | 2   | 6   | 24  | 8   | 18  | 14 | 6   | 55  | 14   | 8   |
| k_Bacteria | p_Firmicutes     | c_Clostridia     | o_Clostridiales    | f_Ruminococaceae       | Unclassified   | Unclassified | 2   | 1   | 0   | 0   | 0  | 4   | 6   | 0   | 1   | 1   | 0   | 30  | 1   | 0   | 0  | 1   | 4   | 4    | 1   |
| k_Bacteria | Unclassified     | Unclassified     | Unclassified       | Unclassified           | Unclassified   | Unclassified | 1   | 4   | 40  | 10  | 0  | 1   | 3   | 21  | 0   | 2   | 12  | 1   | 7   | 16  | 2  | 0   | 7   | 2    | 0   |
| k_Bacteria | p_Bacteroidetes  | c_Bacteroidia    | o_Bacteroidales    | f_[Paraprevotellaceae] | g_CF231        | Unclassified | 4   | 298 | 558 | 0   | 0  | 131 | 138 | 0   | 832 | 171 | 117 | 755 | 936 | 0   | 0  | 433 | 656 | 1193 | 114 |
| k_Bacteria | p_Bacteroidetes  | c_Bacteroidia    | o_Bacteroidales    | f_Prevotellaceae       | g_Prevotella   | s_copri      | 5   | 0   | 0   | 0   | 8  | 0   | 4   | 3   | 6   | 1   | 2   | 1   | 0   | 0   | 0  | 4   | 14  | 0    | 1   |

| Level_1    | Level_2           | Level_3                | Level_4           | Level_5               | Level_6            | Level_7      | ss10 | sn15 | sn16 | ss19 | sn20 | ss21 | ss25 | sn26 | sn27 | ss28 | ss2 | ss30 | sn31 | sn35 | sn36 | sn5 | ss6 | ss8 | sn9 |
|------------|-------------------|------------------------|-------------------|-----------------------|--------------------|--------------|------|------|------|------|------|------|------|------|------|------|-----|------|------|------|------|-----|-----|-----|-----|
| k_Bacteria | p__Proteobacteria | Unclassified           | Unclassified      | Unclassified          | Unclassified       | Unclassified | 1    | 0    | 2    | 0    | 1    | 1    | 1    | 2    | 1    | 1    | 0   | 3    | 4    | 0    | 0    | 1   | 0   | 3   | 1   |
| k_Bacteria | p__Firmicutes     | c__Clostridia          | o__Clostridiales  | f__Lachnospiraceae    | Unclassified       | Unclassified | 3    | 4    | 3    | 1    | 1    | 0    | 0    | 1    | 0    | 0    | 0   | 17   | 0    | 1    | 0    | 1   | 6   | 1   | 0   |
| k_Bacteria | p__Firmicutes     | c__Clostridia          | o__Clostridiales  | f__[Mogibacteriaceae] | Unclassified       | Unclassified | 6    | 0    | 0    | 0    | 3    | 1    | 2    | 0    | 4    | 4    | 0   | 0    | 0    | 0    | 0    | 0   | 0   | 18  | 2   |
| k_Bacteria | p__Firmicutes     | c__Clostridia          | o__Clostridiales  | f__Lachnospiraceae    | Unclassified       | Unclassified | 8    | 5    | 4    | 3    | 8    | 6    | 0    | 0    | 7    | 0    | 1   | 1    | 1    | 0    | 2    | 0   | 11  | 1   | 6   |
| k_Bacteria | p__Firmicutes     | c__Clostridia          | o__Clostridiales  | f__Ruminococcaceae    | g__Oscillospira    | Unclassified | 2    | 1    | 4    | 1    | 0    | 3    | 0    | 0    | 2    | 1    | 0   | 5    | 0    | 0    | 0    | 0   | 2   | 3   | 0   |
| k_Bacteria | p__Firmicutes     | c__Clostridia          | o__Clostridiales  | f__Ruminococcaceae    | Unclassified       | Unclassified | 2    | 1    | 1    | 4    | 1    | 1    | 0    | 3    | 1    | 3    | 3   | 3    | 3    | 0    | 2    | 0   | 4   | 3   | 0   |
| k_Bacteria | p__Firmicutes     | c__Clostridia          | o__Clostridiales  | f__Ruminococcaceae    | g__Ruminococcus    | Unclassified | 9    | 6    | 2    | 0    | 0    | 19   | 4    | 11   | 28   | 11   | 30  | 10   | 16   | 0    | 0    | 24  | 19  | 14  | 36  |
| k_Bacteria | p__Firmicutes     | c__Clostridia          | o__Clostridiales  | f__Lachnospiraceae    | g__Dorea           | Unclassified | 4    | 6    | 0    | 13   | 2    | 1    | 8    | 36   | 0    | 1    | 1   | 3    | 0    | 1    | 1    | 1   | 5   | 0   | 5   |
| k_Bacteria | p__Tenericutes    | c__Mollicutes          | o__RF39           | Unclassified          | Unclassified       | Unclassified | 2    | 0    | 0    | 0    | 0    | 0    | 40   | 0    | 0    | 0    | 2   | 0    | 0    | 0    | 0    | 0   | 0   | 0   | 0   |
| k_Bacteria | p__Bacteroidetes  | c__Bacteroidia         | o__Bacteroidales  | f__Prevotellaceae     | g__Prevotella      | s__copri     | 1    | 0    | 2    | 0    | 1    | 0    | 0    | 0    | 1    | 2    | 0   | 0    | 0    | 0    | 0    | 1   | 1   | 0   | 0   |
| k_Bacteria | Unclassified      | Unclassified           | Unclassified      | Unclassified          | Unclassified       | Unclassified | 13   | 4    | 3    | 2    | 3    | 3    | 8    | 18   | 0    | 1    | 0   | 1    | 5    | 15   | 16   | 6   | 6   | 5   | 0   |
| k_Bacteria | p__Proteobacteria | c__Gammaproteobacteria | o__Pasteurellales | f__Pasteurellaceae    | g__Aggregatibacter | Unclassified | 1    | 1    | 4    | 1    | 0    | 1    | 0    | 0    | 0    | 2    | 1   | 1    | 2    | 0    | 5    | 4   | 0   | 1   | 2   |
| k_Bacteria | p__Firmicutes     | c__Clostridia          | o__Clostridiales  | f__Ruminococcaceae    | g__Oscillospira    | Unclassified | 9    | 1    | 3    | 7    | 6    | 2    | 4    | 3    | 15   | 9    | 14  | 8    | 3    | 46   | 28   | 25  | 7   | 8   | 20  |
| k_Bacteria | Unclassified      | Unclassified           | Unclassified      | Unclassified          | Unclassified       | Unclassified | 2    | 0    | 0    | 0    | 1    | 2    | 0    | 0    | 0    | 0    | 0   | 0    | 0    | 0    | 0    | 0   | 0   | 0   | 0   |



| Level_1    | Level_2           | Level_3           | Level_4         | Level_5              | Level_6        | Level_7      | ss10 | sn15 | sn16 | ss19 | sn20 | ss21 | ss25 | sn26 | sn27 | ss28 | ss2 | ss30 | sn31 | sn35 | sn36 | sn5 | ss6 | ss8 | sn9 |
|------------|-------------------|-------------------|-----------------|----------------------|----------------|--------------|------|------|------|------|------|------|------|------|------|------|-----|------|------|------|------|-----|-----|-----|-----|
| k_Bacteria | p_Firmicutes      | c_Clostridia      | o_Clostridiales | f_Ruminococaceae     | Unclassified   | Unclassified | 2    | 6    | 0    | 0    | 0    | 0    | 19   | 0    | 0    | 0    | 0   | 3    | 3    | 5    | 4    | 1   | 0   | 0   | 3   |
| k_Bacteria | p_Firmicutes      | c_Clostridia      | o_Clostridiales | f_Lachnospiraceae    | Unclassified   | Unclassified | 2    | 2    | 1    | 2    | 0    | 2    | 0    | 0    | 0    | 0    | 0   | 0    | 7    | 0    | 0    | 0   | 114 | 2   | 16  |
| k_Bacteria | p_Firmicutes      | c_Clostridia      | o_Clostridiales | f_[Mogibacteriaceae] | Unclassified   | Unclassified | 9    | 0    | 1    | 0    | 4    | 5    | 0    | 0    | 18   | 0    | 0   | 1    | 0    | 1    | 4    | 3   | 2   | 5   | 0   |
| k_Bacteria | Unclassified      | Unclassified      | Unclassified    | Unclassified         | Unclassified   | Unclassified | 2    | 0    | 8    | 0    | 0    | 0    | 0    | 0    | 4    | 0    | 1   | 12   | 1    | 0    | 0    | 0   | 0   | 0   | 0   |
| k_Bacteria | p_Firmicutes      | c_Clostridia      | o_Clostridiales | Unclassified         | Unclassified   | Unclassified | 5    | 0    | 0    | 0    | 0    | 1    | 0    | 0    | 3    | 0    | 1   | 3    | 0    | 0    | 0    | 2   | 1   | 0   | 0   |
| k_Bacteria | p_Firmicutes      | c_Clostridia      | o_Clostridiales | f_Lachnospiraceae    | Unclassified   | Unclassified | 2    | 1    | 0    | 0    | 0    | 0    | 0    | 0    | 0    | 0    | 0   | 0    | 0    | 1    | 0    | 0   | 0   | 0   | 0   |
| k_Bacteria | p_Verrucomicrobia | c_Verrucomicrobia | o_WCHB1-41      | f_RFP12              | Unclassified   | Unclassified | 4    | 0    | 0    | 0    | 1    | 2    | 0    | 0    | 3    | 0    | 4   | 25   | 9    | 0    | 0    | 0   | 5   | 26  | 7   |
| k_Bacteria | p_Firmicutes      | c_Clostridia      | o_Clostridiales | f_Lachnospiraceae    | Unclassified   | Unclassified | 2    | 0    | 8    | 1    | 0    | 1    | 3    | 20   | 0    | 1    | 0   | 0    | 1    | 1    | 0    | 0   | 4   | 3   | 0   |
| k_Bacteria | p_Firmicutes      | c_Clostridia      | o_Clostridiales | f_Ruminococaceae     | Unclassified   | Unclassified | 5    | 0    | 6    | 3    | 4    | 28   | 1    | 0    | 9    | 0    | 8   | 30   | 4    | 58   | 11   | 17  | 0   | 0   | 1   |
| k_Bacteria | p_Firmicutes      | c_Clostridia      | o_Clostridiales | Unclassified         | Unclassified   | Unclassified | 4    | 1    | 0    | 3    | 0    | 0    | 0    | 2    | 0    | 0    | 0   | 4    | 0    | 0    | 2    | 0   | 13  | 0   | 0   |
| k_Bacteria | p_Firmicutes      | c_Clostridia      | o_Clostridiales | f_Lachnospiraceae    | Unclassified   | Unclassified | 2    | 7    | 0    | 8    | 0    | 6    | 0    | 0    | 0    | 0    | 0   | 0    | 0    | 0    | 22   | 0   | 4   | 7   | 3   |
| k_Bacteria | p_Firmicutes      | c_Clostridia      | o_Clostridiales | f_Ruminococaceae     | Unclassified   | Unclassified | 5    | 13   | 6    | 19   | 13   | 1    | 20   | 3    | 0    | 11   | 0   | 4    | 40   | 16   | 11   | 1   | 4   | 2   | 17  |
| k_Bacteria | Unclassified      | Unclassified      | Unclassified    | Unclassified         | Unclassified   | Unclassified | 1    | 0    | 1    | 4    | 1    | 1    | 1    | 0    | 0    | 1    | 1   | 3    | 0    | 2    | 1    | 0   | 1   | 0   | 0   |
| k_Bacteria | p_Firmicutes      | c_Clostridia      | o_Clostridiales | f_Ruminococaceae     | g_Oscillospira | Unclassified | 2    | 0    | 0    | 0    | 1    | 0    | 0    | 0    | 5    | 0    | 0   | 2    | 1    | 0    | 0    | 2   | 0   | 0   | 0   |

| Level_1    | Level_2           | Level_3           | Level_4            | Level_5              | Level_6          | Level_7      | ss10 | sn15 | sn16 | ss19 | sn20 | ss21 | ss25 | sn26 | sn27 | ss28 | ss2 | ss30 | sn31 | sn35 | sn36 | sn5 | ss6 | ss8 | sn9 |
|------------|-------------------|-------------------|--------------------|----------------------|------------------|--------------|------|------|------|------|------|------|------|------|------|------|-----|------|------|------|------|-----|-----|-----|-----|
| k_Bacteria | p_Bacteroidetes   | c_Bacteroidia     | o_Bacteroidales    | f_RF16               | Unclassified     | Unclassified | 18   | 0    | 0    | 0    | 0    | 19   | 0    | 0    | 0    | 0    | 0   | 0    | 78   | 0    | 0    | 65  | 0   | 0   | 0   |
| k_Bacteria | p_Firmicutes      | c_Clostridia      | o_Clostridiales    | f_Dehalobacteriaceae | Unclassified     | Unclassified | 2    | 1    | 0    | 1    | 1    | 0    | 0    | 0    | 1    | 0    | 0   | 1    | 0    | 0    | 2    | 0   | 0   | 1   | 0   |
| k_Bacteria | p_Actinobacteria  | c_Coriobacteriia  | o_Coriobacteriales | f_Coriobacteriaceae  | g_Adlercreutzia  | Unclassified | 1    | 1    | 0    | 0    | 1    | 0    | 0    | 0    | 0    | 1    | 0   | 0    | 0    | 0    | 0    | 0   | 0   | 0   | 0   |
| k_Bacteria | p_Firmicutes      | c_Clostridia      | o_Clostridiales    | f_Lachnospiraceae    | Unclassified     | Unclassified | 6    | 3    | 0    | 3    | 0    | 1    | 1    | 0    | 0    | 0    | 1   | 0    | 0    | 1    | 0    | 0   | 0   | 2   | 0   |
| k_Bacteria | Unclassified      | Unclassified      | Unclassified       | Unclassified         | Unclassified     | Unclassified | 1    | 1    | 38   | 24   | 0    | 0    | 4    | 5    | 0    | 1    | 1   | 24   | 0    | 9    | 1    | 1   | 0   | 0   | 2   |
| k_Bacteria | p_Firmicutes      | c_Clostridia      | o_Clostridiales    | Unclassified         | Unclassified     | Unclassified | 5    | 1    | 0    | 4    | 5    | 4    | 0    | 0    | 11   | 3    | 0   | 5    | 0    | 4    | 0    | 0   | 8   | 19  | 3   |
| k_Bacteria | p_Firmicutes      | c_Clostridia      | o_Clostridiales    | Unclassified         | Unclassified     | Unclassified | 3    | 37   | 52   | 9    | 2    | 41   | 94   | 124  | 27   | 324  | 18  | 44   | 228  | 156  | 21   | 45  | 59  | 88  | 65  |
| k_Bacteria | p_Firmicutes      | c_Clostridia      | o_Clostridiales    | Unclassified         | Unclassified     | Unclassified | 9    | 4    | 33   | 48   | 9    | 26   | 15   | 0    | 4    | 12   | 47  | 2    | 8    | 3    | 7    | 8   | 6   | 3   | 17  |
| k_Bacteria | p_Verrucomicrobia | c_Verrucomicrobia | o_WCHB1-41         | f_RFP12              | Unclassified     | Unclassified | 1    | 0    | 0    | 0    | 10   | 0    | 0    | 0    | 2    | 0    | 0   | 0    | 4    | 0    | 0    | 0   | 0   | 8   | 0   |
| k_Bacteria | p_Firmicutes      | c_Clostridia      | o_Clostridiales    | Unclassified         | Unclassified     | Unclassified | 3    | 0    | 0    | 5    | 2    | 2    | 1    | 4    | 0    | 0    | 0   | 4    | 1    | 1    | 1    | 1   | 0   | 1   | 1   |
| k_Bacteria | p_Firmicutes      | c_Clostridia      | o_Clostridiales    | f_Ruminococcaceae    | Unclassified     | Unclassified | 3    | 0    | 0    | 0    | 0    | 0    | 0    | 0    | 0    | 0    | 0   | 0    | 0    | 0    | 0    | 0   | 6   | 17  | 0   |
| k_Bacteria | p_Bacteroidetes   | c_Bacteroidia     | o_Bacteroidales    | f_Prevotellaceae     | g_Prevotella     | s_copri      | 4    | 0    | 0    | 0    | 1    | 2    | 8    | 5    | 5    | 6    | 0   | 2    | 4    | 0    | 0    | 4   | 3   | 0   | 1   |
| k_Bacteria | p_Actinobacteria  | c_Coriobacteriia  | o_Coriobacteriales | f_Coriobacteriaceae  | Unclassified     | Unclassified | 1    | 0    | 1    | 2    | 0    | 0    | 0    | 0    | 1    | 0    | 0   | 0    | 4    | 0    | 0    | 0   | 1   | 0   | 0   |
| k_Bacteria | p_Firmicutes      | c_Clostridia      | o_Clostridiales    | f_Lachnospiraceae    | g_[Ruminococcus] | s_gnavus     | 1    | 0    | 0    | 0    | 0    | 0    | 0    | 0    | 0    | 0    | 0   | 27   | 0    | 0    | 0    | 0   | 9   | 0   | 0   |

| Level_1    | Level_2         | Level_3          | Level_4         | Level_5                      | Level_6        | Level_7      | ss1<br>0 | sn<br>15 | sn<br>16 | ss<br>19 | sn<br>20 | ss<br>21 | ss<br>25 | sn<br>26 | sn<br>27 | ss2<br>8 | ss2 | ss<br>30 | sn<br>31 | sn<br>35 | sn<br>36 | sn<br>5 | ss<br>6 | ss<br>8 | sn<br>9 |
|------------|-----------------|------------------|-----------------|------------------------------|----------------|--------------|----------|----------|----------|----------|----------|----------|----------|----------|----------|----------|-----|----------|----------|----------|----------|---------|---------|---------|---------|
| k_Bacteria | p_Firmicutes    | c_Clostridia     | o_Clostridiales | Unclassified                 | Unclassified   | Unclassified | 7        | 0        | 21       | 16       | 11       | 1        | 0        | 4        | 7        | 3        | 3   | 39       | 5        | 19       | 6        | 3       | 4       | 5       | 3       |
| k_Archaea  | p_Euryarchaeota | c_Thermoplasmata | o_E2            | f_[Methanomassiliococcaceae] | g_vadinCA11    | Unclassified | 19       | 7        | 35       | 22       | 20       | 32       | 3        | 5        | 14       | 36       | 18  | 105      | 10       | 24       | 43       | 9       | 25      | 59      | 11      |
| k_Bacteria | p_Firmicutes    | c_Clostridia     | o_Clostridiales | Unclassified                 | Unclassified   | Unclassified | 1        | 0        | 31       | 0        | 2        | 1        | 9        | 9        | 8        | 0        | 27  | 35       | 2        | 28       | 6        | 0       | 1       | 38      | 4       |
| k_Bacteria | p_Firmicutes    | c_Clostridia     | o_Clostridiales | f_Ruminococaceae             | Unclassified   | Unclassified | 1        | 1        | 3        | 4        | 1        | 0        | 2        | 2        | 2        | 2        | 0   | 11       | 0        | 0        | 0        | 2       | 2       | 1       | 1       |
| k_Bacteria | p_Firmicutes    | c_Clostridia     | o_Clostridiales | Unclassified                 | Unclassified   | Unclassified | 1        | 0        | 3        | 0        | 0        | 1        | 0        | 0        | 2        | 0        | 0   | 6        | 0        | 1        | 0        | 0       | 0       | 1       | 0       |
| k_Bacteria | p_Bacteroidetes | c_Bacteroidia    | o_Bacteroidales | f_Bacteroidaceae             | g_Bacteroides  | Unclassified | 1        | 0        | 1        | 118      | 0        | 0        | 0        | 0        | 1        | 0        | 0   | 0        | 0        | 0        | 50       | 0       | 0       | 0       | 0       |
| k_Bacteria | p_Firmicutes    | c_Clostridia     | o_Clostridiales | f_Ruminococaceae             | g_Oscillospira | Unclassified | 2        | 1        | 9        | 2        | 1        | 4        | 6        | 3        | 0        | 0        | 1   | 14       | 1        | 27       | 4        | 0       | 1       | 1       | 2       |
| k_Bacteria | Unclassified    | Unclassified     | Unclassified    | Unclassified                 | Unclassified   | Unclassified | 1        | 0        | 0        | 0        | 1        | 0        | 0        | 0        | 0        | 0        | 0   | 0        | 0        | 0        | 0        | 0       | 0       | 0       | 1       |
| k_Bacteria | p_Firmicutes    | c_Clostridia     | o_Clostridiales | f_Ruminococaceae             | g_Oscillospira | Unclassified | 2        | 1        | 9        | 29       | 3        | 7        | 14       | 1        | 11       | 2        | 2   | 29       | 8        | 12       | 1        | 2       | 8       | 3       | 1       |
| k_Bacteria | p_Firmicutes    | c_Clostridia     | o_Clostridiales | f_Ruminococaceae             | g_Oscillospira | Unclassified | 1        | 0        | 0        | 0        | 0        | 0        | 0        | 0        | 0        | 0        | 2   | 0        | 0        | 5        | 4        | 4       | 0       | 2       | 0       |
| k_Bacteria | p_Firmicutes    | c_Clostridia     | o_Clostridiales | Unclassified                 | Unclassified   | Unclassified | 1        | 0        | 0        | 1        | 0        | 2        | 4        | 8        | 6        | 0        | 3   | 5        | 0        | 0        | 0        | 1       | 6       | 3       | 0       |
| k_Bacteria | p_Bacteroidetes | c_Bacteroidia    | o_Bacteroidales | f_Prevotellaceae             | g_Prevotella   | s_copri      | 5        | 2        | 1        | 62       | 10       | 5        | 19       | 12       | 4        | 12       | 5   | 2        | 8        | 13       | 27       | 13      | 21      | 30      | 13      |
| k_Bacteria | p_Firmicutes    | c_Clostridia     | o_Clostridiales | f_Ruminococaceae             | Unclassified   | Unclassified | 1        | 3        | 4        | 2        | 1        | 0        | 0        | 1178     | 0        | 0        | 1   | 0        | 2        | 0        | 7        | 0       | 2       | 4       | 9       |
| k_Bacteria | p_Firmicutes    | c_Clostridia     | o_Clostridiales | Unclassified                 | Unclassified   | Unclassified | 1        | 0        | 6        | 11       | 0        | 0        | 0        | 11       | 0        | 0        | 3   | 944      | 0        | 1        | 8        | 13      | 0       | 20      | 9       |

| Level_1    | Level_2         | Level_3        | Level_4          | Level_5                | Level_6        | Level_7      | ss1<br>0 | sn<br>15 | sn<br>16 | ss<br>19 | sn<br>20 | ss<br>21 | ss<br>25 | sn<br>26 | sn<br>27 | ss2<br>8 | ss2 | ss<br>30 | sn<br>31 | sn<br>35 | sn<br>36 | sn<br>5 | ss<br>6 | ss<br>8 | sn<br>9 |
|------------|-----------------|----------------|------------------|------------------------|----------------|--------------|----------|----------|----------|----------|----------|----------|----------|----------|----------|----------|-----|----------|----------|----------|----------|---------|---------|---------|---------|
| k_Bacteria | p_Spirochaetes  | c_Spirochaetes | o_Spirochaetales | f_Spirochaetales       | g_Treponema    | Unclassified | 3        | 0        | 0        | 23       | 0        | 1        | 1        | 0        | 0        | 1        | 0   | 5        | 0        | 0        | 0        | 0       | 0       | 0       | 0       |
| k_Bacteria | p_Firmicutes    | c_Clostridia   | o_Clostridiales  | f_Lachnospiraceae      | g_Lachnospira  | Unclassified | 7        | 0        | 36       | 0        | 104      | 0        | 0        | 82       | 51       | 69       | 33  | 1        | 4        | 1        | 0        | 1       | 0       | 1       | 0       |
| k_Bacteria | p_Firmicutes    | c_Clostridia   | o_Clostridiales  | f_Ruminococcaceae      | g_Oscillospira | Unclassified | 3        | 0        | 66       | 13       | 0        | 13       | 72       | 0        | 62       | 10       | 39  | 55       | 10       | 201      | 20       | 19      | 64      | 0       | 9       |
| k_Bacteria | p_Firmicutes    | c_Clostridia   | o_Clostridiales  | f_Lachnospiraceae      | g_Blautia      | s_obeum      | 4        | 8        | 4        | 2        | 33       | 25       | 12       | 16       | 13       | 28       | 3   | 6        | 5        | 8        | 6        | 1       | 2       | 6       | 10      |
| k_Bacteria | p_Firmicutes    | c_Clostridia   | o_Clostridiales  | Unclassified           | Unclassified   | Unclassified | 2        | 0        | 99       | 3        | 0        | 24       | 0        | 282      | 0        | 0        | 0   | 1        | 0        | 0        | 3        | 1       | 0       | 0       | 12      |
| k_Bacteria | p_Firmicutes    | c_Clostridia   | o_Clostridiales  | f_Ruminococcaceae      | Unclassified   | Unclassified | 1        | 0        | 0        | 0        | 9        | 12       | 5        | 0        | 12       | 0        | 1   | 3        | 1        | 5        | 0        | 5       | 4       | 4       | 4       |
| k_Bacteria | p_Firmicutes    | c_Clostridia   | o_Clostridiales  | Unclassified           | Unclassified   | Unclassified | 2        | 24       | 0        | 13       | 24       | 0        | 0        | 0        | 0        | 0        | 42  | 14       | 31       | 8        | 0        | 6       | 3       | 15      | 6       |
| k_Bacteria | p_Firmicutes    | c_Clostridia   | o_Clostridiales  | f_Ruminococcaceae      | g_Oscillospira | Unclassified | 9        | 7        | 21       | 38       | 6        | 10       | 39       | 30       | 8        | 5        | 6   | 46       | 2        | 43       | 37       | 3       | 23      | 55      | 23      |
| k_Bacteria | p_Firmicutes    | c_Clostridia   | o_Clostridiales  | f_Ruminococcaceae      | Unclassified   | Unclassified | 6        | 6        | 15       | 5        | 1        | 8        | 14       | 11       | 30       | 9        | 0   | 36       | 7        | 20       | 6        | 11      | 14      | 16      | 13      |
| k_Bacteria | p_Bacteroidetes | c_Bacteroidia  | o_Bacteroidales  | f_S24-7                | Unclassified   | Unclassified | 1        | 0        | 9        | 0        | 0        | 0        | 1        | 22       | 9        | 2        | 0   | 0        | 1        | 0        | 14       | 0       | 2       | 6       | 9       |
| k_Bacteria | p_Bacteroidetes | c_Bacteroidia  | o_Bacteroidales  | f_S24-7                | Unclassified   | Unclassified | 2        | 0        | 16       | 0        | 1        | 16       | 7        | 7        | 8        | 4        | 1   | 3        | 5        | 1        | 2        | 8       | 16      | 1       | 10      |
| k_Bacteria | p_Bacteroidetes | c_Bacteroidia  | o_Bacteroidales  | f_[Paraprevotellaceae] | g_CF231        | Unclassified | 2        | 2        | 1        | 2        | 0        | 0        | 2        | 0        | 2        | 1        | 0   | 1        | 0        | 0        | 0        | 2       | 0       | 3       | 0       |
| k_Bacteria | p_Firmicutes    | c_Clostridia   | o_Clostridiales  | f_Lachnospiraceae      | Unclassified   | Unclassified | 3        | 22       | 22       | 0        | 0        | 8        | 48       | 1        | 65       | 16       | 16  | 2        | 4        | 0        | 12       | 4       | 1       | 0       | 0       |
| k_Bacteria | p_Bacteroidetes | c_Bacteroidia  | o_Bacteroidales  | f_Prevotellaceae       | g_Prevotella   | Unclassified | 1        | 0        | 0        | 0        | 1        | 2        | 0        | 1        | 2        | 3        | 0   | 0        | 2        | 1        | 0        | 0       | 4       | 0       | 0       |

| Level_1    | Level_2         | Level_3           | Level_4              | Level_5               | Level_6         | Level_7      | ss10 | sn15 | sn16 | ss19 | sn20 | ss21 | ss25 | sn26 | sn27 | ss28 | ss2 | ss30 | sn31 | sn35 | sn36 | sn5 | ss6 | ss8 | sn9 |
|------------|-----------------|-------------------|----------------------|-----------------------|-----------------|--------------|------|------|------|------|------|------|------|------|------|------|-----|------|------|------|------|-----|-----|-----|-----|
| k_Bacteria | p_Firmicutes    | c_Clostridia      | o_Clostridiales      | f_Lachnospiraceae     | Unclassified    | Unclassified | 5    | 1    | 1    | 0    | 2    | 1    | 0    | 0    | 1    | 0    | 1   | 0    | 0    | 2    | 0    | 1   | 0   | 0   | 1   |
| k_Bacteria | p_Firmicutes    | Unclassified      | Unclassified         | Unclassified          | Unclassified    | Unclassified | 3    | 0    | 0    | 1    | 0    | 0    | 2    | 0    | 0    | 1    | 0   | 0    | 0    | 0    | 0    | 1   | 0   | 1   | 1   |
| k_Bacteria | p_Firmicutes    | c_Clostridia      | o_Clostridiales      | f_Ruminococcaceae     | g_Ruminococcus  | Unclassified | 2    | 0    | 0    | 0    | 0    | 0    | 0    | 0    | 2    | 0    | 0   | 3    | 0    | 0    | 0    | 1   | 0   | 0   | 1   |
| k_Bacteria | p_Bacteroidetes | c_Bacteroidia     | o_Bacteroidales      | f_Prevotellaceae      | g_Prevotella    | s_copri      | 1    | 1    | 0    | 0    | 1    | 1    | 0    | 0    | 1    | 0    | 1   | 1    | 0    | 0    | 3    | 0   | 0   | 0   | 1   |
| k_Bacteria | p_Firmicutes    | c_Clostridia      | o_Clostridiales      | Unclassified          | Unclassified    | Unclassified | 2    | 0    | 9    | 1    | 0    | 0    | 23   | 15   | 27   | 3    | 13  | 3    | 1    | 0    | 18   | 39  | 0   | 49  | 9   |
| k_Bacteria | p_Firmicutes    | c_Clostridia      | o_Clostridiales      | Unclassified          | Unclassified    | Unclassified | 1    | 1    | 5    | 4    | 4    | 0    | 4    | 2    | 0    | 0    | 1   | 7    | 1    | 1    | 0    | 1   | 3   | 1   | 0   |
| k_Bacteria | p_Firmicutes    | c_Clostridia      | o_Clostridiales      | f_Lachnospiraceae     | g_Dorea         | Unclassified | 4    | 0    | 0    | 0    | 1    | 8    | 0    | 0    | 2    | 0    | 5   | 1    | 0    | 0    | 0    | 7   | 0   | 0   | 0   |
| k_Bacteria | p_Bacteroidetes | c_Bacteroidia     | o_Bacteroidales      | f_S24-7               | Unclassified    | Unclassified | 2    | 6    | 4    | 0    | 0    | 11   | 0    | 15   | 0    | 0    | 0   | 0    | 0    | 0    | 0    | 0   | 6   | 3   | 42  |
| k_Bacteria | p_Firmicutes    | c_Bacilli         | o_Lactobacillales    | f_Lactobacillaceae    | g_Lactobacillus | Unclassified | 1    | 0    | 0    | 1    | 0    | 1    | 3    | 2    | 0    | 1    | 9   | 0    | 0    | 2    | 1    | 1   | 2   | 0   | 1   |
| k_Bacteria | p_Firmicutes    | c_Clostridia      | o_Clostridiales      | f_Lachnospiraceae     | Unclassified    | Unclassified | 1    | 3    | 1    | 1    | 3    | 0    | 3    | 1    | 2    | 1    | 2   | 0    | 0    | 5    | 3    | 3   | 0   | 1   | 1   |
| k_Bacteria | p_Firmicutes    | c_Clostridia      | o_Clostridiales      | f_Ruminococcaceae     | Unclassified    | Unclassified | 1    | 0    | 6    | 14   | 0    | 0    | 9    | 5    | 0    | 0    | 3   | 22   | 0    | 7    | 3    | 1   | 0   | 5   | 1   |
| k_Bacteria | p_Firmicutes    | c_Clostridia      | o_Clostridiales      | f_Lachnospiraceae     | Unclassified    | Unclassified | 1    | 3    | 74   | 9    | 0    | 2    | 0    | 3    | 2    | 3    | 1   | 97   | 6    | 63   | 22   | 2   | 7   | 2   | 1   |
| k_Bacteria | p_Bacteroidetes | c_Bacteroidia     | o_Bacteroidales      | f_Prevotellaceae      | g_Prevotella    | s_copri      | 2    | 1    | 1    | 0    | 1    | 1    | 0    | 0    | 1    | 1    | 0   | 0    | 1    | 0    | 0    | 1   | 0   | 0   | 0   |
| k_Bacteria | p_Firmicutes    | c_Erysipelotrichi | o_Erysipelotrichales | f_Erysipelotrichaceae | g_p-75-a5       | Unclassified | 1    | 1    | 1    | 2    | 0    | 2    | 0    | 0    | 0    | 1    | 0   | 1    | 1    | 1    | 5    | 1   | 0   | 2   | 0   |

| Level_1    | Level_2          | Level_3               | Level_4                | Level_5                 | Level_6          | Level_7        | ss1<br>0 | sn<br>15 | sn<br>16 | ss<br>19 | sn<br>20 | ss<br>21 | ss<br>25 | sn<br>26 | sn<br>27 | ss2<br>8 | ss2 | ss<br>30 | sn<br>31 | sn<br>35 | sn<br>36 | sn<br>5 | ss<br>6 | ss<br>8 | sn<br>9 |
|------------|------------------|-----------------------|------------------------|-------------------------|------------------|----------------|----------|----------|----------|----------|----------|----------|----------|----------|----------|----------|-----|----------|----------|----------|----------|---------|---------|---------|---------|
| k_Bacteria | p_Firmicutes     | c_Clostridia          | o_Clostridiales        | f_Ruminococaceae        | g_Oscillospira   | Unclassified   | 1        | 0        | 6        | 1        | 0        | 25       | 45       | 0        | 0        | 0        | 3   | 34       | 0        | 29       | 1        | 0       | 0       | 0       | 0       |
| k_Bacteria | p_Firmicutes     | c_Clostridia          | o_Clostridiales        | f_Lachnospiraceae       | Unclassified     | Unclassified   | 1        | 0        | 1        | 0        | 0        | 0        | 0        | 4        | 0        | 0        | 0   | 0        | 0        | 0        | 0        | 0       | 1       | 1       | 1       |
| k_Bacteria | p_Proteobacteria | c_Alphaproteobacteria | o_RF32                 | Unclassified            | Unclassified     | Unclassified   | 2        | 4        | 88       | 0        | 2        | 0        | 4        | 0        | 0        | 1        | 26  | 0        | 0        | 2        | 23       | 3       | 0       | 37      | 9       |
| k_Bacteria | p_Bacteroidetes  | c_Bacteroidia         | o_Bacteroidales        | f_S24-7                 | Unclassified     | Unclassified   | 1        | 0        | 1        | 1        | 1        | 0        | 1        | 1        | 0        | 0        | 0   | 0        | 0        | 0        | 1        | 1       | 2       | 0       | 4       |
| k_Bacteria | p_Firmicutes     | c_Clostridia          | o_Clostridiales        | f_Lachnospiraceae       | Unclassified     | Unclassified   | 1        | 6        | 0        | 8        | 1        | 0        | 12       | 5        | 83       | 8        | 317 | 8        | 2        | 6        | 175      | 0       | 0       | 34      | 3       |
| k_Bacteria | p_Firmicutes     | c_Clostridia          | o_Clostridiales        | f_Ruminococaceae        | Unclassified     | Unclassified   | 4        | 0        | 5        | 0        | 0        | 3        | 0        | 0        | 6        | 0        | 3   | 16       | 6        | 24       | 15       | 1       | 9       | 8       | 1       |
| k_Bacteria | p_Cyanobacteria  | c_4C0d-2              | o_YS2                  | Unclassified            | Unclassified     | Unclassified   | 1        | 0        | 1        | 1        | 0        | 15       | 0        | 57       | 18       | 1        | 0   | 32       | 3        | 0        | 8        | 0       | 65      | 0       | 0       |
| k_Bacteria | p_Lentisphaerae  | c_[Lentisphaeria]     | o_Victivales           | f_Victivallaceae        | Unclassified     | Unclassified   | 1        | 0        | 1        | 0        | 2        | 7        | 0        | 0        | 4        | 0        | 1   | 3        | 0        | 0        | 3        | 2       | 2       | 3       | 18      |
| k_Bacteria | p_Firmicutes     | c_Clostridia          | o_Clostridiales        | Unclassified            | Unclassified     | Unclassified   | 4        | 0        | 0        | 0        | 2        | 24       | 0        | 0        | 8        | 0        | 1   | 3        | 5        | 0        | 0        | 7       | 2       | 0       | 11      |
| k_Bacteria | p_Firmicutes     | c_Clostridia          | o_Clostridiales        | Unclassified            | Unclassified     | Unclassified   | 4        | 25       | 2        | 200      | 2        | 29       | 0        | 0        | 1        | 0        | 8   | 13       | 20       | 43       | 1        | 19      | 0       | 5       | 35      |
| k_Bacteria | p_Firmicutes     | c_Clostridia          | o_Clostridiales        | f_Ruminococaceae        | g_Butyricoccus   | s_pullicaeorum | 1        | 0        | 0        | 9        | 5        | 1        | 22       | 1        | 1        | 2        | 0   | 15       | 0        | 0        | 1        | 0       | 3       | 9       | 0       |
| k_Bacteria | p_Proteobacteria | c_Deltaproteobacteria | o_Desulfobivibrionales | f_Desulfobivibrionaceae | Unclassified     | Unclassified   | 2        | 1        | 2        | 4        | 2        | 0        | 1        | 0        | 0        | 0        | 1   | 13       | 2        | 7        | 3        | 0       | 0       | 2       | 5       |
| k_Bacteria | p_Firmicutes     | c_Clostridia          | o_Clostridiales        | f_Ruminococaceae        | Unclassified     | Unclassified   | 4        | 4        | 34       | 1        | 85       | 21       | 33       | 15       | 478      | 56       | 10  | 44       | 11       | 855      | 252      | 20      | 24      | 15      | 25      |
| k_Bacteria | p_Firmicutes     | c_Bacilli             | o_Bacillales           | f_Staphylococaceae      | g_Staphylococcus | Unclassified   | 2        | 0        | 2        | 0        | 0        | 6        | 0        | 1        | 1        | 0        | 0   | 2        | 1        | 3        | 2        | 4       | 1       | 3       | 0       |

| Level_1    | Level_2          | Level_3          | Level_4            | Level_5             | Level_6         | Level_7      | ss1<br>0 | sn<br>15 | sn<br>16 | ss<br>19 | sn<br>20 | ss<br>21 | ss<br>25 | sn<br>26 | sn<br>27 | ss2<br>8 | ss2 | ss<br>30 | sn<br>31 | sn<br>35 | sn<br>36 | sn<br>5 | ss<br>6 | ss<br>8 | sn<br>9 |
|------------|------------------|------------------|--------------------|---------------------|-----------------|--------------|----------|----------|----------|----------|----------|----------|----------|----------|----------|----------|-----|----------|----------|----------|----------|---------|---------|---------|---------|
| k_Bacteria | p_Firmicutes     | c_Clostridia     | o_Clostridiales    | f_Ruminococaceae    | g_Oscillospira  | Unclassified | 2        | 0        | 0        | 8        | 2        | 0        | 0        | 0        | 1        | 0        | 3   | 4        | 0        | 1        | 2        | 0       | 1       | 1       | 0       |
| k_Bacteria | p_Firmicutes     | c_Clostridia     | o_Clostridiales    | f_Ruminococaceae    | Unclassified    | Unclassified | 1        | 0        | 0        | 0        | 0        | 0        | 0        | 0        | 0        | 0        | 0   | 0        | 0        | 1        | 0        | 0       | 0       | 0       | 0       |
| k_Bacteria | p_Firmicutes     | c_Clostridia     | o_Clostridiales    | f_Ruminococaceae    | Unclassified    | Unclassified | 1        | 0        | 0        | 0        | 0        | 0        | 0        | 2        | 0        | 0        | 0   | 0        | 0        | 1        | 2        | 0       | 0       | 1       | 1       |
| k_Bacteria | p_Firmicutes     | c_Clostridia     | o_Clostridiales    | f_Lachnospiraceae   | Unclassified    | Unclassified | 1        | 7        | 81       | 0        | 0        | 0        | 0        | 0        | 0        | 0        | 0   | 3        | 12       | 0        | 43       | 0       | 0       | 0       | 0       |
| k_Bacteria | p_Firmicutes     | c_Clostridia     | o_Clostridiales    | f_Lachnospiraceae   | g_Blautia       | Unclassified | 2        | 1        | 0        | 2        | 4        | 2        | 0        | 0        | 0        | 0        | 0   | 0        | 0        | 0        | 0        | 0       | 0       | 0       | 0       |
| k_Bacteria | p_Actinobacteria | c_Coriobacteriia | o_Coriobacteriales | f_Coriobacteriaceae | Unclassified    | Unclassified | 1        | 1        | 1        | 0        | 0        | 0        | 0        | 1        | 1        | 0        | 0   | 1        | 0        | 0        | 0        | 0       | 0       | 0       | 0       |
| k_Bacteria | p_Bacteroidetes  | c_Bacteroidia    | o_Bacteroidales    | f_S24-7             | Unclassified    | Unclassified | 1        | 0        | 1        | 0        | 0        | 0        | 0        | 0        | 1        | 0        | 1   | 0        | 1        | 0        | 1        | 0       | 1       | 2       | 0       |
| k_Bacteria | p_Firmicutes     | c_Clostridia     | o_Clostridiales    | f_Veillonellaceae   | g_Veillonella   | Unclassified | 1        | 1        | 0        | 0        | 0        | 0        | 1        | 1        | 0        | 5        | 1   | 0        | 3        | 3        | 2        | 6       | 4       | 4       | 13      |
| k_Bacteria | p_Firmicutes     | c_Clostridia     | o_Clostridiales    | Unclassified        | Unclassified    | Unclassified | 2        | 0        | 0        | 0        | 0        | 2        | 0        | 0        | 0        | 0        | 0   | 0        | 0        | 0        | 0        | 1       | 0       | 0       | 0       |
| k_Bacteria | p_Firmicutes     | c_Clostridia     | o_Clostridiales    | f_Lachnospiraceae   | Unclassified    | Unclassified | 2        | 0        | 0        | 0        | 1        | 1        | 1        | 1        | 3        | 0        | 3   | 1        | 0        | 1        | 0        | 0       | 0       | 0       | 3       |
| k_Bacteria | p_Fibrobacteres  | c_Fibrobacteriia | o_Fibrobacteriales | f_Fibrobacteraceae  | g_Fibrobacter   | Unclassified | 6        | 79       | 73       | 10       | 6        | 13<br>7  | 0        | 0        | 14       | 0        | 8   | 48       | 74       | 0        | 0        | 10<br>0 | 19      | 51<br>4 | 62      |
| k_Bacteria | p_Firmicutes     | c_Clostridia     | o_Clostridiales    | f_Lachnospiraceae   | Unclassified    | Unclassified | 3        | 3        | 43       | 0        | 4        | 1        | 5        | 9        | 0        | 0        | 0   | 1        | 0        | 0        | 1        | 3       | 1       | 2       | 0       |
| k_Bacteria | p_Firmicutes     | c_Clostridia     | o_Clostridiales    | f_Ruminococaceae    | g_Oscillospira  | Unclassified | 1        | 0        | 0        | 0        | 1        | 1        | 0        | 0        | 0        | 0        | 0   | 0        | 0        | 0        | 0        | 0       | 1       | 0       | 0       |
| k_Bacteria | p_Firmicutes     | c_Bacilli        | o_Lactobacillales  | f_Lactobacillaceae  | g_Lactobacillus | Unclassified | 1        | 0        | 0        | 0        | 0        | 0        | 0        | 0        | 0        | 0        | 0   | 0        | 0        | 0        | 0        | 0       | 0       | 1       | 0       |

| Level_1    | Level_2         | Level_3       | Level_4         | Level_5               | Level_6           | Level_7      | ss10 | sn15 | sn16 | ss19 | sn20 | ss21 | ss25 | sn26 | sn27 | ss28 | ss2 | ss30 | sn31 | sn35 | sn36 | sn5 | ss6 | ss8 | sn9 |
|------------|-----------------|---------------|-----------------|-----------------------|-------------------|--------------|------|------|------|------|------|------|------|------|------|------|-----|------|------|------|------|-----|-----|-----|-----|
| k_Bacteria | p_Bacteroidetes | c_Bacteroidia | o_Bacteroidales | f_S24-7               | Unclassified      | Unclassified | 1    | 0    | 0    | 0    | 1    | 0    | 10   | 0    | 0    | 6    | 0   | 0    | 2    | 0    | 0    | 0   | 6   | 0   | 1   |
| k_Bacteria | p_Firmicutes    | c_Clostridia  | o_Clostridiales | f_Christensenellaceae | Unclassified      | Unclassified | 1    | 1    | 2    | 0    | 1    | 1    | 2    | 0    | 0    | 2    | 0   | 2    | 1    | 0    | 0    | 0   | 3   | 4   | 0   |
| k_Bacteria | p_Firmicutes    | c_Clostridia  | o_Clostridiales | f_Ruminococcaceae     | g_Oscillospira    | Unclassified | 3    | 4    | 44   | 21   | 40   | 12   | 56   | 11   | 1    | 6    | 13  | 16   | 11   | 81   | 5    | 5   | 3   | 17  | 9   |
| k_Bacteria | p_Bacteroidetes | c_Bacteroidia | o_Bacteroidales | f_Prevotellaceae      | g_Prevotella      | s_copri      | 2    | 2    | 0    | 2    | 4    | 0    | 0    | 1    | 1    | 6    | 2   | 2    | 5    | 1    | 3    | 1   | 0   | 0   | 0   |
| k_Bacteria | p_Firmicutes    | c_Clostridia  | o_Clostridiales | Unclassified          | Unclassified      | Unclassified | 1    | 0    | 0    | 0    | 0    | 0    | 0    | 0    | 0    | 0    | 0   | 1    | 0    | 0    | 1    | 0   | 0   | 0   | 0   |
| k_Bacteria | p_Bacteroidetes | c_Bacteroidia | o_Bacteroidales | f_Prevotellaceae      | g_Prevotella      | Unclassified | 1    | 1    | 2    | 1    | 0    | 1    | 0    | 0    | 1    | 2    | 2   | 1    | 0    | 0    | 1    | 0   | 0   | 0   | 0   |
| k_Bacteria | p_Firmicutes    | c_Clostridia  | o_Clostridiales | f_Dehalobacteriaceae  | g_Dehalobacterium | Unclassified | 1    | 0    | 0    | 1    | 0    | 1    | 0    | 0    | 2    | 0    | 0   | 0    | 0    | 0    | 0    | 0   | 0   | 1   | 0   |
| k_Bacteria | p_Firmicutes    | c_Clostridia  | o_Clostridiales | Unclassified          | Unclassified      | Unclassified | 2    | 12   | 1    | 4    | 11   | 19   | 179  | 43   | 49   | 4    | 11  | 16   | 8    | 139  | 2    | 27  | 35  | 125 | 23  |
| k_Bacteria | p_Firmicutes    | c_Clostridia  | o_Clostridiales | f_Ruminococcaceae     | g_Ruminococcus    | Unclassified | 1    | 0    | 0    | 0    | 0    | 0    | 0    | 0    | 0    | 0    | 0   | 0    | 0    | 1    | 1    | 0   | 0   | 0   | 0   |
| k_Bacteria | p_Bacteroidetes | c_Bacteroidia | o_Bacteroidales | f_Prevotellaceae      | g_Prevotella      | s_copri      | 2    | 12   | 1    | 4    | 1    | 3    | 12   | 47   | 0    | 0    | 3   | 7    | 13   | 2    | 2    | 31  | 0   | 25  | 36  |
| k_Bacteria | Unclassified    | Unclassified  | Unclassified    | Unclassified          | Unclassified      | Unclassified | 2    | 4    | 2    | 7    | 0    | 0    | 12   | 258  | 0    | 3    | 3   | 58   | 3    | 12   | 0    | 3   | 5   | 2   | 3   |
| k_Bacteria | p_Bacteroidetes | c_Bacteroidia | o_Bacteroidales | f_Bacteroidaceae      | g_Bacteroides     | s_eggerthii  | 1    | 1    | 2    | 13   | 1    | 2    | 0    | 9    | 2    | 0    | 1   | 4    | 0    | 11   | 5    | 0   | 3   | 1   | 4   |
| k_Bacteria | p_Firmicutes    | c_Clostridia  | o_Clostridiales | f_Ruminococcaceae     | Unclassified      | Unclassified | 1    | 0    | 0    | 0    | 0    | 1    | 0    | 0    | 1    | 0    | 0   | 3    | 0    | 0    | 0    | 0   | 0   | 0   | 0   |
| k_Bacteria | p_Firmicutes    | c_Clostridia  | o_Clostridiales | f_Ruminococcaceae     | g_Oscillospira    | Unclassified | 1    | 0    | 0    | 0    | 1    | 0    | 0    | 0    | 2    | 0    | 0   | 3    | 3    | 0    | 0    | 1   | 1   | 3   | 0   |



| Level_1    | Level_2          | Level_3          | Level_4            | Level_5             | Level_6        | Level_7      | ss10 | sn15 | sn16 | ss19 | sn20 | ss21 | ss25 | sn26 | sn27 | ss28 | ss2 | ss30 | sn31 | sn35 | sn36 | sn5 | ss6 | ss8 | sn9 |
|------------|------------------|------------------|--------------------|---------------------|----------------|--------------|------|------|------|------|------|------|------|------|------|------|-----|------|------|------|------|-----|-----|-----|-----|
| k_Bacteria | p_Firmicutes     | c_Clostridia     | o_Clostridiales    | f_Ruminococaceae    | Unclassified   | Unclassified | 1    | 1    | 6    | 32   | 2    | 80   | 4    | 0    | 61   | 0    | 71  | 15   | 5    | 25   | 47   | 61  | 4   | 91  | 6   |
| k_Bacteria | p_Firmicutes     | c_Clostridia     | o_Clostridiales    | f_Ruminococaceae    | g_Oscillospira | Unclassified | 2    | 0    | 3    | 5    | 0    | 0    | 1    | 0    | 0    | 0    | 0   | 1    | 0    | 0    | 0    | 0   | 1   | 2   | 0   |
| k_Bacteria | p_Firmicutes     | c_Clostridia     | o_Clostridiales    | f_Lachnospiraceae   | Unclassified   | Unclassified | 1    | 1    | 16   | 8    | 3    | 0    | 2    | 6    | 0    | 3    | 1   | 34   | 1    | 15   | 3    | 0   | 2   | 2   | 3   |
| k_Bacteria | p_Actinobacteria | c_Coriobacteriia | o_Coriobacteriales | f_Coriobacteriaceae | Unclassified   | Unclassified | 2    | 2    | 0    | 0    | 0    | 2    | 0    | 0    | 5    | 0    | 1   | 1    | 1    | 0    | 1    | 1   | 0   | 2   | 1   |
| k_Bacteria | p_Firmicutes     | c_Clostridia     | o_Clostridiales    | f_Ruminococaceae    | g_Oscillospira | Unclassified | 3    | 1    | 1    | 9    | 0    | 3    | 13   | 9    | 8    | 1    | 1   | 0    | 7    | 45   | 0    | 6   | 11  | 0   | 0   |
| k_Bacteria | p_Firmicutes     | c_Clostridia     | o_Clostridiales    | Unclassified        | Unclassified   | Unclassified | 2    | 0    | 2    | 0    | 0    | 2    | 22   | 0    | 26   | 0    | 26  | 0    | 0    | 0    | 6    | 8   | 37  | 87  | 13  |
| k_Bacteria | p_Firmicutes     | c_Bacilli        | o_Turicibacterales | f_Turicibacteraceae | g_Turicibacter | Unclassified | 2    | 4    | 0    | 4    | 0    | 0    | 0    | 1    | 0    | 0    | 0   | 2    | 2    | 0    | 0    | 0   | 0   | 0   | 0   |
| k_Bacteria | p_Firmicutes     | c_Clostridia     | o_Clostridiales    | Unclassified        | Unclassified   | Unclassified | 1    | 1    | 38   | 0    | 7    | 0    | 22   | 3    | 1    | 0    | 0   | 3    | 0    | 43   | 8    | 1   | 0   | 5   | 0   |
| k_Bacteria | p_Firmicutes     | c_Clostridia     | o_Clostridiales    | Unclassified        | Unclassified   | Unclassified | 1    | 5    | 2    | 0    | 0    | 0    | 5    | 0    | 0    | 0    | 0   | 4    | 0    | 16   | 0    | 2   | 10  | 28  | 0   |
| k_Bacteria | p_Firmicutes     | c_Clostridia     | o_Clostridiales    | f_Lachnospiraceae   | Unclassified   | Unclassified | 2    | 28   | 1    | 14   | 3    | 3    | 3    | 5    | 1    | 7    | 21  | 156  | 1    | 43   | 5    | 7   | 38  | 23  | 2   |
| k_Bacteria | p_TM7            | c_TM7-3          | o_CW040            | f_F16               | Unclassified   | Unclassified | 1    | 0    | 4    | 1    | 0    | 2    | 8    | 1    | 1    | 1    | 3   | 0    | 2    | 4    | 6    | 1   | 3   | 5   | 2   |
| k_Bacteria | Unclassified     | Unclassified     | Unclassified       | Unclassified        | Unclassified   | Unclassified | 1    | 0    | 1    | 2    | 0    | 1    | 1    | 0    | 2    | 0    | 2   | 1    | 3    | 2    | 0    | 0   | 1   | 3   | 0   |
| k_Bacteria | p_Firmicutes     | c_Clostridia     | o_Clostridiales    | f_Ruminococaceae    | Unclassified   | Unclassified | 1    | 3    | 0    | 0    | 1    | 0    | 1    | 0    | 0    | 0    | 0   | 0    | 0    | 0    | 1    | 0   | 2   | 0   | 2   |
| k_Bacteria | p_Firmicutes     | c_Clostridia     | o_Clostridiales    | f_Lachnospiraceae   | g_Dorea        | Unclassified | 1    | 0    | 8    | 0    | 2    | 0    | 1    | 3    | 2    | 1    | 1   | 0    | 2    | 1    | 0    | 0   | 2   | 1   | 3   |

| Level_1    | Level_2         | Level_3           | Level_4              | Level_5                | Level_6        | Level_7      | ss1<br>0 | sn<br>15 | sn<br>16 | ss<br>19 | sn<br>20 | ss<br>21 | ss<br>25 | sn<br>26 | sn<br>27 | ss2<br>8 | ss2 | ss<br>30 | sn<br>31 | sn<br>35 | sn<br>36 | sn<br>5 | ss<br>6 | ss<br>8 | sn<br>9 |
|------------|-----------------|-------------------|----------------------|------------------------|----------------|--------------|----------|----------|----------|----------|----------|----------|----------|----------|----------|----------|-----|----------|----------|----------|----------|---------|---------|---------|---------|
| k_Bacteria | p_Bacteroidetes | c_Bacteroidia     | o_Bacteroidales      | f_Prevotellaceae       | g_Prevotellae  | Unclassified | 1        | 0        | 1        | 0        | 0        | 1        | 2        | 1        | 0        | 2        | 1   | 2        | 0        | 2        | 0        | 0       | 1       | 0       | 0       |
| k_Bacteria | p_Firmicutes    | c_Clostridia      | o_Clostridiales      | f_Lachnospiraceae      | Unclassified   | Unclassified | 1        | 1        | 1        | 0        | 0        | 0        | 1        | 0        | 0        | 0        | 0   | 40       | 1        | 56       | 0        | 0       | 0       | 1       | 0       |
| k_Bacteria | p_Firmicutes    | c_Clostridia      | o_Clostridiales      | f_Lachnospiraceae      | Unclassified   | Unclassified | 1        | 10       | 0        | 1        | 0        | 0        | 1        | 0        | 0        | 0        | 17  | 0        | 10       | 1        | 11       | 21      | 0       | 65      | 38      |
| k_Bacteria | p_Firmicutes    | c_Clostridia      | o_Clostridiales      | f_Ruminococcaceae      | g_Ruminococcus | Unclassified | 1        | 0        | 0        | 10       | 2        | 3        | 3        | 3        | 0        | 2        | 5   | 24       | 0        | 5        | 0        | 1       | 4       | 4       | 3       |
| k_Bacteria | p_Bacteroidetes | c_Bacteroidia     | o_Bacteroidales      | f_Prevotellaceae       | g_Prevotellae  | Unclassified | 2        | 1        | 1        | 3        | 1        | 0        | 0        | 2        | 3        | 0        | 2   | 0        | 1        | 2        | 2        | 1       | 4       | 1       | 0       |
| k_Bacteria | p_Firmicutes    | c_Clostridia      | o_Clostridiales      | f_Lachnospiraceae      | Unclassified   | Unclassified | 1        | 0        | 32       | 44       | 0        | 10       | 0        | 0        | 0        | 1        | 16  | 42       | 7        | 93       | 1        | 0       | 8       | 0       | 9       |
| k_Bacteria | p_Bacteroidetes | c_Bacteroidia     | o_Bacteroidales      | f_[Paraprevotellaceae] | g_CF231        | Unclassified | 1        | 1        | 2        | 0        | 95       | 28       | 92       | 0        | 3        | 1        | 0   | 4        | 31       | 0        | 2        | 52      | 10      | 10      | 0       |
| k_Bacteria | p_Firmicutes    | c_Erysipelotrichi | o_Erysipelotrichales | f_Erysipelotrichaceae  | Unclassified   | Unclassified | 1        | 2        | 3        | 5        | 11       | 1        | 7        | 0        | 0        | 2        | 1   | 0        | 1        | 0        | 0        | 6       | 0       | 0       | 11      |
| k_Bacteria | p_Firmicutes    | c_Clostridia      | o_Clostridiales      | f_Ruminococcaceae      | Unclassified   | Unclassified | 2        | 1        | 10       | 15       | 2        | 5        | 3        | 7        | 1        | 3        | 4   | 37       | 5        | 23       | 2        | 1       | 0       | 5       | 0       |
| k_Bacteria | p_Firmicutes    | c_Clostridia      | o_Clostridiales      | f_Lachnospiraceae      | Unclassified   | Unclassified | 1        | 0        | 0        | 0        | 0        | 0        | 0        | 0        | 1        | 0        | 0   | 0        | 0        | 0        | 0        | 0       | 0       | 0       | 0       |
| k_Bacteria | p_Firmicutes    | c_Clostridia      | o_Clostridiales      | f_Lachnospiraceae      | Unclassified   | Unclassified | 1        | 2        | 1        | 23       | 3        | 2        | 2        | 4        | 0        | 1        | 3   | 24       | 2        | 2        | 2        | 4       | 3       | 10      | 1       |
| k_Bacteria | p_Firmicutes    | c_Clostridia      | o_Clostridiales      | f_Ruminococcaceae      | Unclassified   | Unclassified | 1        | 0        | 3        | 1        | 0        | 0        | 0        | 0        | 1        | 0        | 0   | 2        | 0        | 6        | 0        | 1       | 1       | 0       | 0       |
| k_Bacteria | p_Bacteroidetes | c_Bacteroidia     | o_Bacteroidales      | f_Prevotellaceae       | g_Prevotellae  | s_copri      | 1        | 2        | 1        | 1        | 2        | 7        | 0        | 0        | 0        | 5        | 0   | 1        | 0        | 1        | 3        | 0       | 0       | 0       | 0       |
| k_Bacteria | p_Firmicutes    | c_Clostridia      | o_Clostridiales      | f_Lachnospiraceae      | Unclassified   | Unclassified | 1        | 4        | 23       | 29       | 1        | 1        | 1        | 0        | 0        | 1        | 1   | 3        | 0        | 5        | 24       | 0       | 1       | 3       | 0       |

| Level_1    | Level_2          | Level_3               | Level_4         | Level_5               | Level_6        | Level_7      | ss1<br>0 | sn<br>15 | sn<br>16 | ss<br>19 | sn<br>20 | ss<br>21 | ss<br>25 | sn<br>26 | sn<br>27 | ss2<br>8 | ss2 | ss<br>30 | sn<br>31 | sn<br>35 | sn<br>36 | sn<br>5 | ss<br>6 | ss<br>8 | sn<br>9 |
|------------|------------------|-----------------------|-----------------|-----------------------|----------------|--------------|----------|----------|----------|----------|----------|----------|----------|----------|----------|----------|-----|----------|----------|----------|----------|---------|---------|---------|---------|
| k_Bacteria | p_Firmicutes     | c_Clostridia          | o_Clostridiales | f_Ruminococaceae      | Unclassified   | Unclassified | 1        | 0        | 0        | 1        | 1        | 0        | 3        | 0        | 3        | 0        | 0   | 16       | 1        | 3        | 0        | 0       | 0       | 0       | 0       |
| k_Bacteria | p_Firmicutes     | c_Clostridia          | o_Clostridiales | f_Ruminococaceae      | Unclassified   | Unclassified | 1        | 0        | 9        | 3        | 2        | 1        | 2        | 0        | 2        | 1        | 5   | 8        | 2        | 3        | 2        | 0       | 1       | 1       | 0       |
| k_Bacteria | p_Firmicutes     | c_Clostridia          | o_Clostridiales | Unclassified          | Unclassified   | Unclassified | 1        | 23       | 15       | 10       | 1        | 0        | 14       | 19       | 1        | 1        | 0   | 33       | 1        | 24       | 3        | 0       | 1       | 3       | 1       |
| k_Bacteria | p_Firmicutes     | c_Clostridia          | o_Clostridiales | f_Veillonellaceae     | Unclassified   | Unclassified | 1        | 23       | 14       | 0        | 66       | 42       | 33       | 30       | 23       | 76       | 14  | 10       | 13       | 27       | 20       | 64      | 62      | 1       | 0       |
| k_Bacteria | p_Firmicutes     | c_Clostridia          | o_Clostridiales | f_Lachnospiraceae     | g_Anaerostipes | Unclassified | 1        | 3        | 0        | 1        | 4        | 15       | 4        | 0        | 10       | 0        | 1   | 3        | 1        | 2        | 0        | 1       | 11      | 7       | 3       |
| k_Bacteria | p_Firmicutes     | c_Clostridia          | o_Clostridiales | Unclassified          | Unclassified   | Unclassified | 1        | 3        | 0        | 0        | 1        | 8        | 5        | 0        | 5        | 0        | 0   | 0        | 0        | 0        | 0        | 3       | 2       | 0       | 0       |
| k_Bacteria | p_Firmicutes     | c_Clostridia          | o_Clostridiales | f_Christensenellaceae | Unclassified   | Unclassified | 1        | 0        | 0        | 1        | 0        | 0        | 0        | 0        | 0        | 0        | 0   | 0        | 0        | 0        | 0        | 0       | 1       | 0       | 0       |
| k_Bacteria | p_Bacteroidetes  | c_Bacteroidia         | o_Bacteroidales | f_S24-7               | Unclassified   | Unclassified | 1        | 2        | 10       | 0        | 0        | 38       | 3        | 13       | 0        | 2        | 0   | 0        | 7        | 6        | 5        | 0       | 0       | 16      | 33      |
| k_Bacteria | p_Firmicutes     | c_Clostridia          | o_Clostridiales | f_Ruminococaceae      | Unclassified   | Unclassified | 1        | 0        | 21       | 71       | 14       | 9        | 11       | 2        | 3        | 8        | 13  | 54       | 4        | 3        | 12       | 1       | 5       | 2       | 1       |
| k_Bacteria | p_Firmicutes     | c_Clostridia          | o_Clostridiales | f_Ruminococaceae      | g_Oscillospira | Unclassified | 1        | 0        | 0        | 8        | 4        | 0        | 3        | 2        | 3        | 0        | 0   | 8        | 1        | 2        | 2        | 0       | 0       | 3       | 0       |
| k_Bacteria | p_Proteobacteria | c_Alphaproteobacteria | o_Rickettsiales | f_mitochondria        | Unclassified   | Unclassified | 1        | 0        | 0        | 0        | 1        | 0        | 0        | 0        | 1        | 2        | 0   | 0        | 0        | 0        | 1        | 1       | 0       | 1       | 2       |
| k_Bacteria | p_Firmicutes     | c_Clostridia          | o_Clostridiales | f_Ruminococaceae      | Unclassified   | Unclassified | 2        | 1        | 6        | 0        | 0        | 0        | 0        | 0        | 1        | 1        | 1   | 5        | 0        | 5        | 0        | 0       | 1       | 0       | 0       |
| k_Bacteria | p_Bacteroidetes  | c_Bacteroidia         | o_Bacteroidales | f_Prevotellaceae      | g_Prevotella   | s_copri      | 1        | 0        | 19       | 1        | 48       | 37       | 0        | 1        | 41       | 12       | 10  | 0        | 13       | 0        | 72       | 0       | 0       | 0       | 0       |
| k_Bacteria | p_Firmicutes     | c_Clostridia          | o_Clostridiales | Unclassified          | Unclassified   | Unclassified | 1        | 4        | 0        | 3        | 0        | 0        | 2        | 1        | 0        | 0        | 0   | 1        | 0        | 4        | 0        | 0       | 0       | 0       | 0       |

| Level_1    | Level_2         | Level_3       | Level_4         | Level_5               | Level_6        | Level_7      | ss1<br>0 | sn<br>15 | sn<br>16 | ss<br>19 | sn<br>20 | ss<br>21 | ss<br>25 | sn<br>26 | sn<br>27 | ss2<br>8 | ss2 | ss<br>30 | sn<br>31 | sn<br>35 | sn<br>36 | sn<br>5 | ss<br>6 | ss<br>8 | sn<br>9 |
|------------|-----------------|---------------|-----------------|-----------------------|----------------|--------------|----------|----------|----------|----------|----------|----------|----------|----------|----------|----------|-----|----------|----------|----------|----------|---------|---------|---------|---------|
| k_Bacteria | p_Firmicutes    | c_Clostridia  | o_Clostridiales | Unclassified          | Unclassified   | Unclassified | 1        | 5        | 0        | 3        | 0        | 21       | 14       | 0        | 49       | 19       | 313 | 33       | 6        | 1        | 122      | 14      | 6       | 8       | 6       |
| k_Bacteria | p_Bacteroidetes | c_Bacteroidia | o_Bacteroidales | f_Prevotellaceae      | g_Prevotellae  | Unclassified | 1        | 0        | 0        | 2        | 4        | 0        | 0        | 3        | 0        | 0        | 2   | 1        | 0        | 0        | 2        | 1       | 2       | 1       | 2       |
| k_Bacteria | p_Firmicutes    | c_Clostridia  | o_Clostridiales | f_Ruminococaceae      | g_Oscillospira | Unclassified | 2        | 1        | 4        | 6        | 2        | 0        | 21       | 7        | 1        | 1        | 0   | 5        | 1        | 10       | 0        | 0       | 6       | 1       | 2       |
| k_Bacteria | p_Firmicutes    | c_Clostridia  | o_Clostridiales | f_Ruminococaceae      | g_Ruminococcus | Unclassified | 1        | 19       | 1        | 0        | 75       | 2        | 21       | 46       | 48       | 41       | 0   | 0        | 4        | 0        | 18       | 23      | 0       | 0       | 2       |
| k_Bacteria | p_Tenericutes   | c_Mollicutes  | o_RF39          | Unclassified          | Unclassified   | Unclassified | 1        | 3        | 13       | 1        | 2        | 0        | 62       | 1        | 4        | 0        | 7   | 27       | 0        | 9        | 4        | 0       | 1       | 4       | 0       |
| k_Bacteria | p_Firmicutes    | c_Clostridia  | o_Clostridiales | f_Ruminococaceae      | Unclassified   | Unclassified | 1        | 0        | 0        | 3        | 0        | 0        | 0        | 2        | 0        | 0        | 0   | 7        | 0        | 0        | 0        | 0       | 1       | 0       | 0       |
| k_Bacteria | p_Bacteroidetes | c_Bacteroidia | o_Bacteroidales | f_Prevotellaceae      | g_Prevotellae  | s_copri      | 1        | 0        | 0        | 0        | 3        | 1        | 0        | 0        | 1        | 1        | 3   | 0        | 0        | 0        | 0        | 0       | 0       | 0       | 1       |
| k_Bacteria | p_Firmicutes    | c_Clostridia  | o_Clostridiales | f_Christensenellaceae | Unclassified   | Unclassified | 1        | 0        | 0        | 0        | 0        | 1        | 0        | 0        | 0        | 0        | 0   | 2        | 0        | 0        | 0        | 1       | 0       | 2       | 3       |
| k_Bacteria | p_Firmicutes    | c_Clostridia  | o_Clostridiales | f_Lachnospiraceae     | Unclassified   | Unclassified | 0        | 145      | 23       | 0        | 0        | 161      | 120      | 23       | 0        | 49       | 3   | 144      | 20       | 377      | 3        | 0       | 2       | 0       | 1       |
| k_Bacteria | p_Firmicutes    | c_Clostridia  | o_Clostridiales | f_Lachnospiraceae     | Unclassified   | Unclassified | 0        | 88       | 166      | 86       | 0        | 4        | 0        | 0        | 0        | 25       | 222 | 10       | 12       | 24       | 25       | 77      | 1       | 1       | 1       |
| k_Bacteria | p_Bacteroidetes | c_Bacteroidia | o_Bacteroidales | f_S24-7               | Unclassified   | Unclassified | 0        | 16       | 25       | 28       | 0        | 0        | 13       | 89       | 0        | 6        | 6   | 0        | 0        | 0        | 74       | 0       | 0       | 98      | 28      |
| k_Bacteria | p_Firmicutes    | c_Clostridia  | o_Clostridiales | Unclassified          | Unclassified   | Unclassified | 0        | 24       | 221      | 0        | 0        | 17       | 16       | 0        | 0        | 9        | 0   | 164      | 5        | 15       | 102      | 0       | 35      | 1       | 0       |
| k_Bacteria | p_Firmicutes    | c_Clostridia  | o_Clostridiales | f_Ruminococaceae      | Unclassified   | Unclassified | 0        | 7        | 29       | 21       | 342      | 5        | 304      | 199      | 9        | 180      | 6   | 3        | 207      | 0        | 223      | 94      | 8       | 3       | 12      |
| k_Bacteria | p_Bacteroidetes | c_Bacteroidia | o_Bacteroidales | f_Prevotellaceae      | g_Prevotellae  | Unclassified | 0        | 651      | 111      | 0        | 0        | 672      | 1        | 0        | 359      | 1        | 568 | 250      | 1022     | 0        | 2039     | 3925    | 0       | 12      | 3539    |

| Level_1    | Level_2         | Level_3        | Level_4         | Level_5           | Level_6            | Level_7       | ss1<br>0 | sn<br>15 | sn<br>16 | ss<br>19 | sn<br>20 | ss<br>21 | ss<br>25 | sn<br>26 | sn<br>27 | ss2<br>8 | ss2 | ss<br>30 | sn<br>31 | sn<br>35 | sn<br>36 | sn<br>5 | ss<br>6 | ss<br>8 | sn<br>9 |
|------------|-----------------|----------------|-----------------|-------------------|--------------------|---------------|----------|----------|----------|----------|----------|----------|----------|----------|----------|----------|-----|----------|----------|----------|----------|---------|---------|---------|---------|
| k_Bacteria | p_Firmicutes    | c_Clostridia   | o_Clostridiales | Unclassified      | Unclassified       | Unclassified  | 0        | 21       | 0        | 26       | 0        | 0        | 0        | 0        | 0        | 0        | 0   | 0        | 0        | 0        | 0        | 0       | 0       | 0       | 0       |
| k_Bacteria | p_Firmicutes    | c_Clostridia   | o_Clostridiales | f_Ruminococcales  | g_Oscillospirales  | Unclassified  | 0        | 19       | 73       | 3        | 0        | 76       | 0        | 1        | 2        | 1        | 0   | 14       | 47       | 11       | 43       | 58      | 94      | 34      | 8       |
| k_Bacteria | p_Firmicutes    | c_Clostridia   | o_Clostridiales | f_Ruminococcales  | g_Faecalibacterium | s_prausnitzii | 0        | 19       | 18       | 0        | 0        | 7        | 0        | 0        | 34       | 4        | 28  | 0        | 0        | 0        | 0        | 37      | 8       | 0       | 0       |
| k_Bacteria | p_Firmicutes    | c_Clostridia   | o_Clostridiales | f_Lachnospiraceae | g_Oribacterium     | Unclassified  | 0        | 60       | 45       | 0        | 6        | 16       | 1        | 0        | 0        | 85       | 72  | 42       | 0        | 3        | 0        | 0       | 10      | 0       | 32      |
| k_Bacteria | p_Firmicutes    | c_Clostridia   | o_Clostridiales | f_Lachnospiraceae | Unclassified       | Unclassified  | 0        | 13       | 3        | 0        | 0        | 0        | 0        | 0        | 0        | 0        | 0   | 0        | 37       | 23       | 13       | 4       | 16      | 2       | 22      |
| k_Bacteria | Unclassified    | Unclassified   | Unclassified    | Unclassified      | Unclassified       | Unclassified  | 0        | 57       | 3        | 0        | 0        | 0        | 0        | 0        | 4        | 0        | 2   | 0        | 0        | 0        | 0        | 0       | 0       | 11      | 0       |
| k_Bacteria | p_Bacteroidetes | c_Bacteroidia  | o_Bacteroidales | f_S24-7           | Unclassified       | Unclassified  | 0        | 22       | 35       | 0        | 0        | 0        | 1        | 30       | 71       | 0        | 3   | 1        | 10       | 0        | 0        | 0       | 0       | 0       | 0       |
| k_Bacteria | p_Firmicutes    | c_Clostridia   | o_Clostridiales | Unclassified      | Unclassified       | Unclassified  | 0        | 8        | 3        | 1        | 6        | 1        | 15       | 1        | 2        | 2        | 2   | 2        | 2        | 4        | 4        | 1       | 2       | 5       | 3       |
| k_Bacteria | p_Spirochaetes  | c_Spirochaetes | o_M2PT2-76      | Unclassified      | Unclassified       | Unclassified  | 0        | 2        | 0        | 0        | 0        | 5        | 0        | 0        | 0        | 0        | 1   | 7        | 0        | 0        | 0        | 0       | 0       | 1       | 1       |
| k_Bacteria | p_Firmicutes    | c_Clostridia   | o_Clostridiales | Unclassified      | Unclassified       | Unclassified  | 0        | 21       | 47       | 35       | 0        | 0        | 0        | 1        | 0        | 1        | 0   | 3        | 5        | 0        | 27       | 2       | 1       | 0       | 2       |
| k_Bacteria | p_Firmicutes    | c_Clostridia   | o_Clostridiales | Unclassified      | Unclassified       | Unclassified  | 0        | 21       | 1        | 22       | 0        | 0        | 0        | 0        | 0        | 0        | 0   | 44       | 0        | 2        | 0        | 11      | 8       | 0       | 0       |
| k_Bacteria | p_Firmicutes    | c_Clostridia   | o_Clostridiales | f_Lachnospiraceae | Unclassified       | Unclassified  | 0        | 1        | 3        | 6        | 1        | 1        | 0        | 2        | 0        | 0        | 2   | 7        | 1        | 19       | 0        | 0       | 2       | 0       | 0       |
| k_Bacteria | p_Firmicutes    | c_Clostridia   | o_Clostridiales | Unclassified      | Unclassified       | Unclassified  | 0        | 62       | 0        | 0        | 32       | 0        | 7        | 7        | 92       | 39       | 1   | 16       | 0        | 10       | 8        | 1       | 0       | 0       | 0       |
| k_Bacteria | p_Firmicutes    | c_Clostridia   | o_Clostridiales | Unclassified      | Unclassified       | Unclassified  | 0        | 76       | 0        | 0        | 0        | 29       | 0        | 0        | 5        | 0        | 0   | 0        | 0        | 0        | 0        | 14      | 1       | 0       | 9       |

| Level_1    | Level_2          | Level_3               | Level_4         | Level_5               | Level_6       | Level_7      | ss1<br>0 | sn<br>15 | sn<br>16 | ss<br>19 | sn<br>20 | ss<br>21 | ss<br>25 | sn<br>26 | sn<br>27 | ss2<br>8 | ss2 | ss<br>30 | sn<br>31 | sn<br>35 | sn<br>36 | sn<br>5 | ss<br>6 | ss<br>8 | sn<br>9 |
|------------|------------------|-----------------------|-----------------|-----------------------|---------------|--------------|----------|----------|----------|----------|----------|----------|----------|----------|----------|----------|-----|----------|----------|----------|----------|---------|---------|---------|---------|
| k_Bacteria | p_Bacteroidetes  | c_Bacteroidia         | o_Bacteroidales | f_S24-7               | Unclassified  | Unclassified | 0        | 1        | 7        | 0        | 0        | 0        | 1        | 5        | 6        | 0        | 1   | 1        | 6        | 0        | 9        | 0       | 0       | 1       | 0       |
| k_Bacteria | p_Firmicutes     | c_Clostridia          | o_Clostridiales | f_Lachnospiraceae     | g_Coprococcus | Unclassified | 0        | 5        | 0        | 0        | 0        | 0        | 0        | 0        | 0        | 0        | 0   | 0        | 3        | 0        | 0        | 0       | 1       | 0       | 1       |
| k_Bacteria | p_Firmicutes     | c_Clostridia          | o_Clostridiales | f_Lachnospiraceae     | Unclassified  | Unclassified | 0        | 2        | 0        | 5        | 0        | 6        | 7        | 0        | 0        | 0        | 1   | 1        | 0        | 30       | 3        | 1       | 0       | 3       | 14      |
| k_Bacteria | p_Firmicutes     | c_Clostridia          | o_Clostridiales | f_Lachnospiraceae     | Unclassified  | Unclassified | 0        | 24       | 0        | 51       | 41       | 0        | 0        | 0        | 0        | 0        | 2   | 0        | 0        | 0        | 0        | 3       | 0       | 0       | 9       |
| k_Bacteria | p_Proteobacteria | c_Gammaproteobacteria | o_Aeromonadales | f_Succinivibrionaceae | Unclassified  | Unclassified | 0        | 50       | 69       | 0        | 0        | 53       | 0        | 1        | 84       | 0        | 72  | 49       | 17       | 503      | 102      | 63      | 0       | 153     | 0       |
| k_Bacteria | p_Firmicutes     | c_Clostridia          | o_Clostridiales | Unclassified          | Unclassified  | Unclassified | 0        | 9        | 0        | 0        | 0        | 0        | 0        | 3        | 0        | 0        | 0   | 0        | 0        | 0        | 0        | 0       | 7       | 0       | 0       |
| k_Bacteria | p_Firmicutes     | c_Clostridia          | o_Clostridiales | Unclassified          | Unclassified  | Unclassified | 0        | 1        | 0        | 1        | 0        | 4        | 0        | 0        | 12       | 6        | 10  | 819      | 17       | 352      | 36       | 0       | 2       | 0       | 0       |
| k_Bacteria | p_Firmicutes     | c_Clostridia          | o_Clostridiales | f_Lachnospiraceae     | Unclassified  | Unclassified | 0        | 14       | 37       | 25       | 0        | 20       | 46       | 2        | 163      | 4        | 13  | 0        | 8        | 34       | 55       | 78      | 0       | 2       | 121     |
| k_Bacteria | p_Firmicutes     | c_Clostridia          | o_Clostridiales | f_Lachnospiraceae     | Unclassified  | Unclassified | 0        | 6        | 0        | 0        | 0        | 0        | 1        | 0        | 0        | 0        | 1   | 7        | 0        | 0        | 0        | 0       | 0       | 0       | 0       |
| k_Bacteria | p_Firmicutes     | c_Clostridia          | o_Clostridiales | f_Lachnospiraceae     | Unclassified  | Unclassified | 0        | 11       | 1        | 30       | 0        | 2        | 0        | 0        | 0        | 0        | 0   | 0        | 0        | 0        | 0        | 0       | 4       | 4       | 0       |
| k_Bacteria | p_Bacteroidetes  | c_Bacteroidia         | o_Bacteroidales | f_S24-7               | Unclassified  | Unclassified | 0        | 40       | 53       | 0        | 39       | 70       | 110      | 621      | 133      | 25       | 16  | 51       | 61       | 0        | 49       | 62      | 0       | 107     | 50      |
| k_Bacteria | p_Firmicutes     | c_Clostridia          | o_Clostridiales | f_Lachnospiraceae     | Unclassified  | Unclassified | 0        | 10       | 0        | 0        | 0        | 0        | 0        | 0        | 87       | 109      | 53  | 0        | 0        | 34       | 3        | 0       | 0       | 0       | 0       |
| k_Bacteria | p_Firmicutes     | c_Clostridia          | o_Clostridiales | f_Lachnospiraceae     | Unclassified  | Unclassified | 0        | 5        | 14       | 21       | 5        | 1        | 3        | 0        | 1        | 6        | 5   | 14       | 0        | 16       | 2        | 1       | 2       | 0       | 2       |
| k_Bacteria | p_Firmicutes     | c_Clostridia          | o_Clostridiales | Unclassified          | Unclassified  | Unclassified | 0        | 5        | 11       | 30       | 0        | 1        | 0        | 0        | 0        | 0        | 1   | 11       | 1        | 0        | 1        | 2       | 0       | 3       | 3       |

| Level_1    | Level_2          | Level_3               | Level_4              | Level_5               | Level_6          | Level_7      | ss1<br>0 | sn<br>15 | sn<br>16 | ss<br>19 | sn<br>20 | ss<br>21 | ss<br>25 | sn<br>26 | sn<br>27 | ss2<br>8 | ss2 | ss<br>30 | sn<br>31 | sn<br>35 | sn<br>36 | sn<br>5 | ss<br>6 | ss<br>8 | sn<br>9 |
|------------|------------------|-----------------------|----------------------|-----------------------|------------------|--------------|----------|----------|----------|----------|----------|----------|----------|----------|----------|----------|-----|----------|----------|----------|----------|---------|---------|---------|---------|
| k_Bacteria | p_Firmicutes     | c_Erysipelotrichi     | o_Erysipelotrichales | f_Erysipelotrichaceae | g_p-75-a5        | Unclassified | 0        | 1        | 1        | 0        | 1        | 3        | 4        | 3        | 6        | 2        | 0   | 6        | 2        | 4        | 4        | 0       | 3       | 1       | 1       |
| k_Bacteria | p_Bacteroidetes  | c_Bacteroidia         | o_Bacteroidales      | f_S24-7               | Unclassified     | Unclassified | 0        | 1        | 0        | 69       | 1        | 0        | 21       | 66       | 0        | 3        | 0   | 0        | 0        | 0        | 0        | 0       | 0       | 0       | 0       |
| k_Bacteria | p_Firmicutes     | c_Clostridia          | o_Clostridiales      | f_Ruminococcaceae     | Unclassified     | Unclassified | 0        | 1        | 3        | 8        | 0        | 0        | 1        | 1        | 2        | 0        | 0   | 16       | 2        | 0        | 0        | 0       | 2       | 2       | 0       |
| k_Bacteria | p_Proteobacteria | c_Gammaproteobacteria | o_Enterobacteriales  | f_Enterobacteriaceae  | g_Escherichia    | s_coli       | 0        | 1        | 0        | 7        | 0        | 0        | 0        | 0        | 5        | 0        | 0   | 0        | 0        | 0        | 0        | 0       | 0       | 0       | 1       |
| k_Bacteria | p_Firmicutes     | c_Clostridia          | o_Clostridiales      | f_Lachnospiraceae     | g_[Ruminococcus] | s_gnavus     | 0        | 5        | 0        | 2        | 0        | 0        | 0        | 0        | 0        | 0        | 0   | 0        | 0        | 0        | 0        | 0       | 0       | 2       | 33      |
| k_Bacteria | p_Firmicutes     | c_Clostridia          | o_Clostridiales      | Unclassified          | Unclassified     | Unclassified | 0        | 4        | 32       | 1044     | 3        | 0        | 92       | 0        | 4        | 1        | 5   | 2        | 0        | 13       | 23       | 1       | 3       | 166     | 8       |
| k_Bacteria | p_Firmicutes     | c_Clostridia          | o_Clostridiales      | f_Lachnospiraceae     | Unclassified     | Unclassified | 0        | 1        | 2        | 5        | 0        | 1        | 2        | 0        | 0        | 1        | 2   | 2        | 1        | 5        | 0        | 1       | 1       | 0       | 0       |
| k_Bacteria | p_Firmicutes     | c_Clostridia          | o_Clostridiales      | Unclassified          | Unclassified     | Unclassified | 0        | 3        | 18       | 7        | 2        | 0        | 0        | 1        | 5        | 0        | 10  | 0        | 7        | 7        | 3        | 3       | 3       | 0       | 1       |
| k_Bacteria | p_Firmicutes     | c_Erysipelotrichi     | o_Erysipelotrichales | f_Erysipelotrichaceae | Unclassified     | Unclassified | 0        | 7        | 0        | 1        | 0        | 1        | 0        | 0        | 4        | 4        | 3   | 0        | 1        | 2        | 0        | 0       | 0       | 0       | 0       |
| k_Bacteria | p_Firmicutes     | c_Clostridia          | o_Clostridiales      | Unclassified          | Unclassified     | Unclassified | 0        | 11       | 10       | 0        | 0        | 0        | 0        | 0        | 0        | 31       | 14  | 0        | 5        | 0        | 13       | 18      | 4       | 7       | 0       |
| k_Bacteria | p_Bacteroidetes  | c_Bacteroidia         | o_Bacteroidales      | f_Prevotellaceae      | g_Prevotella     | Unclassified | 0        | 1        | 0        | 0        | 0        | 0        | 0        | 0        | 0        | 1        | 1   | 1        | 1        | 0        | 0        | 0       | 2       | 0       | 1       |
| k_Bacteria | p_Proteobacteria | c_Betaproteobacteria  | o_Burkholderiales    | f_Alcaligenaceae      | g_Sutterella     | Unclassified | 0        | 11       | 2        | 0        | 0        | 21       | 3        | 5        | 15       | 16       | 1   | 37       | 2        | 31       | 3        | 14      | 4       | 1       | 1       |
| k_Bacteria | p_Proteobacteria | c_Betaproteobacteria  | o_Burkholderiales    | f_Alcaligenaceae      | g_Sutterella     | Unclassified | 0        | 3        | 3        | 0        | 0        | 18       | 3        | 16       | 31       | 12       | 2   | 20       | 21       | 3        | 2        | 25      | 10      | 8       | 2       |
| k_Bacteria | p_Firmicutes     | c_Clostridia          | o_Clostridiales      | Unclassified          | Unclassified     | Unclassified | 0        | 6        | 0        | 0        | 0        | 0        | 15       | 0        | 0        | 0        | 0   | 0        | 0        | 0        | 0        | 0       | 4       | 1       | 1       |

| Level_1    | Level_2          | Level_3               | Level_4           | Level_5                | Level_6         | Level_7      | ss1 | sn | sn | ss | sn | ss | sn | ss | sn | ss | sn | sn | sn | sn | sn | ss | ss | sn |    |
|------------|------------------|-----------------------|-------------------|------------------------|-----------------|--------------|-----|----|----|----|----|----|----|----|----|----|----|----|----|----|----|----|----|----|----|
| k_Bacteria | p_Firmicutes     | c_Clostridia          | o_Clostridiales   | f_Ruminococaceae       | Unclassified    | Unclassified | 0   | 2  | 1  | 1  | 2  | 0  | 2  | 0  | 3  | 0  | 1  | 4  | 0  | 1  | 2  | 0  | 4  | 1  | 0  |
| k_Bacteria | p_Proteobacteria | c_Alphaproteobacteria | o_RF32            | Unclassified           | Unclassified    | Unclassified | 0   | 9  | 0  | 0  | 0  | 0  | 0  | 0  | 0  | 0  | 0  | 0  | 0  | 0  | 0  | 0  | 0  | 0  | 0  |
| k_Bacteria | p_Firmicutes     | c_Clostridia          | o_Clostridiales   | Unclassified           | Unclassified    | Unclassified | 0   | 7  | 13 | 85 | 0  | 1  | 22 | 54 | 9  | 5  | 7  | 21 | 8  | 26 | 45 | 2  | 28 | 56 | 2  |
| k_Bacteria | p_Firmicutes     | c_Clostridia          | o_Clostridiales   | Unclassified           | Unclassified    | Unclassified | 0   | 9  | 0  | 40 | 1  | 2  | 0  | 0  | 3  | 0  | 0  | 0  | 3  | 0  | 0  | 3  | 5  | 0  | 0  |
| k_Bacteria | p_Bacteroidetes  | c_Bacteroidia         | o_Bacteroidales   | f_S24-7                | Unclassified    | Unclassified | 0   | 2  | 0  | 0  | 1  | 0  | 0  | 4  | 0  | 0  | 1  | 0  | 0  | 0  | 0  | 0  | 0  | 2  | 1  |
| k_Bacteria | p_Firmicutes     | c_Bacilli             | o_Lactobacillales | f_Streptococaceae      | g_Streptococcus | Unclassified | 0   | 2  | 0  | 1  | 5  | 2  | 1  | 2  | 29 | 3  | 1  | 0  | 1  | 6  | 1  | 5  | 2  | 2  | 9  |
| k_Bacteria | p_Bacteroidetes  | c_Bacteroidia         | o_Bacteroidales   | Unclassified           | Unclassified    | Unclassified | 0   | 7  | 12 | 1  | 0  | 0  | 10 | 0  | 6  | 0  | 2  | 11 | 0  | 0  | 2  | 0  | 22 | 0  | 0  |
| k_Bacteria | Unclassified     | Unclassified          | Unclassified      | Unclassified           | Unclassified    | Unclassified | 0   | 2  | 0  | 0  | 0  | 0  | 0  | 0  | 0  | 0  | 0  | 0  | 0  | 0  | 0  | 0  | 0  | 0  | 0  |
| k_Bacteria | p_Bacteroidetes  | c_Bacteroidia         | o_Bacteroidales   | f_[Paraprevotellaceae] | Unclassified    | Unclassified | 0   | 6  | 14 | 1  | 0  | 1  | 14 | 12 | 8  | 8  | 10 | 28 | 11 | 96 | 13 | 17 | 13 | 5  | 16 |
| k_Bacteria | p_Bacteroidetes  | c_Bacteroidia         | o_Bacteroidales   | f_[Odoribacteraceae]   | g_Butyricimonas | Unclassified | 0   | 3  | 0  | 22 | 7  | 2  | 4  | 0  | 4  | 7  | 2  | 10 | 3  | 18 | 7  | 4  | 2  | 1  | 3  |
| k_Bacteria | p_Firmicutes     | c_Clostridia          | o_Clostridiales   | f_Lachnospiraceae      | Unclassified    | Unclassified | 0   | 6  | 17 | 26 | 0  | 65 | 40 | 65 | 16 | 15 | 3  | 22 | 52 | 19 | 16 | 0  | 40 | 1  | 0  |
| k_Bacteria | p_Firmicutes     | c_Clostridia          | o_Clostridiales   | f_Ruminococaceae       | Unclassified    | Unclassified | 0   | 4  | 1  | 1  | 0  | 0  | 0  | 0  | 3  | 3  | 5  | 1  | 1  | 7  | 3  | 2  | 6  | 2  | 0  |
| k_Bacteria | p_Firmicutes     | c_Clostridia          | o_Clostridiales   | f_Ruminococaceae       | g_Ruminococcus  | Unclassified | 0   | 8  | 3  | 0  | 1  | 14 | 0  | 0  | 1  | 0  | 1  | 35 | 3  | 59 | 1  | 4  | 3  | 8  | 5  |
| k_Bacteria | p_Firmicutes     | c_Clostridia          | o_Clostridiales   | Unclassified           | Unclassified    | Unclassified | 0   | 3  | 10 | 0  | 3  | 3  | 0  | 1  | 1  | 0  | 6  | 12 | 0  | 21 | 5  | 1  | 2  | 1  | 2  |



| Level_1    | Level_2         | Level_3       | Level_4         | Level_5           | Level_6        | Level_7      | ss1<br>0 | sn<br>15 | sn<br>16 | ss<br>19 | sn<br>20 | ss<br>21 | ss<br>25 | sn<br>26 | sn<br>27 | ss2<br>8 | ss2 | ss<br>30 | sn<br>31 | sn<br>35 | sn<br>36 | sn<br>5 | ss<br>6 | ss<br>8 | sn<br>9 |
|------------|-----------------|---------------|-----------------|-------------------|----------------|--------------|----------|----------|----------|----------|----------|----------|----------|----------|----------|----------|-----|----------|----------|----------|----------|---------|---------|---------|---------|
| k_Bacteria | p_Firmicutes    | c_Clostridia  | o_Clostridiales | Unclassified      | Unclassified   | Unclassified | 0        | 2        | 6        | 0        | 0        | 1        | 0        | 0        | 0        | 12       | 0   | 180      | 31       | 0        | 9        | 0       | 0       | 0       | 0       |
| k_Bacteria | p_Firmicutes    | c_Clostridia  | o_Clostridiales | f_Ruminococaceae  | Unclassified   | Unclassified | 0        | 7        | 18       | 2        | 0        | 0        | 7        | 24       | 0        | 4        | 1   | 0        | 0        | 0        | 0        | 0       | 2       | 0       | 1       |
| k_Bacteria | p_Firmicutes    | c_Clostridia  | o_Clostridiales | f_Lachnospiraceae | Unclassified   | Unclassified | 0        | 3        | 1        | 13       | 0        | 2        | 0        | 0        | 0        | 0        | 0   | 0        | 0        | 1        | 0        | 0       | 1       | 0       | 0       |
| k_Bacteria | p_Bacteroidetes | c_Bacteroidia | o_Bacteroidales | f_S24-7           | Unclassified   | Unclassified | 0        | 4        | 2        | 0        | 0        | 10       | 6        | 87       | 0        | 0        | 3   | 0        | 0        | 1        | 12       | 0       | 0       | 22      | 8       |
| k_Bacteria | p_Bacteroidetes | c_Bacteroidia | o_Bacteroidales | Unclassified      | Unclassified   | Unclassified | 0        | 2        | 0        | 0        | 0        | 0        | 1        | 0        | 0        | 0        | 0   | 2        | 1        | 2        | 1        | 0       | 1       | 0       | 2       |
| k_Bacteria | p_Firmicutes    | c_Clostridia  | o_Clostridiales | f_Ruminococaceae  | Unclassified   | Unclassified | 0        | 1        | 0        | 0        | 0        | 2        | 0        | 1        | 1        | 1        | 0   | 2        | 1        | 11       | 0        | 0       | 1       | 0       | 0       |
| k_Bacteria | p_Firmicutes    | c_Clostridia  | o_Clostridiales | Unclassified      | Unclassified   | Unclassified | 0        | 2        | 4        | 0        | 1        | 6        | 9        | 0        | 4        | 0        | 0   | 5        | 3        | 1        | 2        | 0       | 6       | 1       | 1       |
| k_Bacteria | p_Firmicutes    | c_Clostridia  | o_Clostridiales | f_Lachnospiraceae | Unclassified   | Unclassified | 0        | 1        | 0        | 1        | 0        | 0        | 0        | 0        | 0        | 0        | 0   | 0        | 0        | 0        | 0        | 0       | 1       | 0       | 0       |
| k_Bacteria | p_Firmicutes    | c_Clostridia  | o_Clostridiales | f_Ruminococaceae  | g_Ruminococcus | Unclassified | 0        | 6        | 1        | 0        | 0        | 0        | 0        | 0        | 0        | 0        | 3   | 41       | 0        | 47       | 9        | 0       | 0       | 2       | 2       |
| k_Bacteria | Unclassified    | Unclassified  | Unclassified    | Unclassified      | Unclassified   | Unclassified | 0        | 2        | 0        | 0        | 0        | 0        | 0        | 5        | 0        | 0        | 0   | 0        | 0        | 0        | 0        | 0       | 1       | 0       | 0       |
| k_Bacteria | p_Firmicutes    | c_Clostridia  | o_Clostridiales | f_Lachnospiraceae | Unclassified   | Unclassified | 0        | 1        | 2        | 0        | 0        | 1        | 0        | 0        | 0        | 0        | 0   | 7        | 0        | 6        | 0        | 0       | 0       | 1       | 0       |
| k_Bacteria | p_Firmicutes    | c_Clostridia  | o_Clostridiales | f_Lachnospiraceae | Unclassified   | Unclassified | 0        | 3        | 0        | 0        | 0        | 0        | 0        | 25       | 0        | 0        | 0   | 28       | 0        | 0        | 0        | 0       | 0       | 2       | 0       |
| k_Bacteria | p_Firmicutes    | c_Clostridia  | o_Clostridiales | f_Lachnospiraceae | Unclassified   | Unclassified | 0        | 2        | 0        | 0        | 0        | 0        | 0        | 0        | 0        | 0        | 0   | 0        | 5        | 0        | 12       | 0       | 0       | 0       | 6       |
| k_Bacteria | p_Firmicutes    | c_Clostridia  | o_Clostridiales | Unclassified      | Unclassified   | Unclassified | 0        | 5        | 0        | 0        | 0        | 0        | 0        | 0        | 6        | 23       | 0   | 0        | 0        | 0        | 0        | 0       | 3       | 0       | 0       |

| Level_1    | Level_2           | Level_3           | Level_4              | Level_5               | Level_6          | Level_7      | ss1<br>0 | sn<br>15 | sn<br>16 | ss<br>19 | sn<br>20 | ss<br>21 | ss<br>25 | sn<br>26 | sn<br>27 | ss2<br>8 | ss2 | ss<br>30 | sn<br>31 | sn<br>35 | sn<br>36 | sn<br>5 | ss<br>6 | ss<br>8 | sn<br>9 |
|------------|-------------------|-------------------|----------------------|-----------------------|------------------|--------------|----------|----------|----------|----------|----------|----------|----------|----------|----------|----------|-----|----------|----------|----------|----------|---------|---------|---------|---------|
| k_Bacteria | p_Firmicutes      | c_Clostridia      | o_Clostridiales      | f_Lachnospiraceae     | g_Coproccus      | Unclassified | 0        | 8        | 2        | 0        | 0        | 4        | 0        | 0        | 7        | 3        | 3   | 0        | 0        | 1        | 0        | 4       | 0       | 0       | 0       |
| k_Bacteria | p_Firmicutes      | c_Clostridia      | o_Clostridiales      | Unclassified          | Unclassified     | Unclassified | 0        | 1        | 0        | 0        | 0        | 0        | 7        | 0        | 0        | 1        | 1   | 2        | 2        | 3        | 0        | 1       | 4       | 8       | 5       |
| k_Bacteria | p_Firmicutes      | c_Clostridia      | o_Clostridiales      | f_Lachnospiraceae     | g_[Ruminococcus] | s_gnavus     | 0        | 3        | 0        | 1        | 0        | 1        | 0        | 0        | 0        | 0        | 0   | 0        | 0        | 0        | 0        | 1       | 0       | 2       | 0       |
| k_Bacteria | p_Cyanobacteria   | c_4C0d-2          | o_YS2                | Unclassified          | Unclassified     | Unclassified | 0        | 3        | 95       | 0        | 0        | 0        | 0        | 0        | 0        | 0        | 0   | 17       | 0        | 0        | 0        | 0       | 0       | 0       | 0       |
| k_Bacteria | p_Bacteroidetes   | c_Bacteroidia     | o_Bacteroidales      | f_S24-7               | Unclassified     | Unclassified | 0        | 1        | 0        | 1        | 0        | 0        | 1        | 0        | 2        | 0        | 1   | 1        | 3        | 0        | 0        | 0       | 0       | 4       | 3       |
| k_Bacteria | p_Firmicutes      | c_Clostridia      | o_Clostridiales      | f_Lachnospiraceae     | g_Dorea          | Unclassified | 0        | 1        | 14       | 18       | 0        | 0        | 1        | 2        | 5        | 4        | 5   | 3        | 0        | 3        | 3        | 2       | 6       | 3       | 0       |
| k_Bacteria | p_Tenericutes     | c_Mollicutes      | o_RF39               | Unclassified          | Unclassified     | Unclassified | 0        | 2        | 0        | 0        | 0        | 0        | 0        | 0        | 0        | 0        | 0   | 0        | 0        | 0        | 0        | 0       | 11      | 47      | 0       |
| k_Bacteria | p_Deferribacteres | c_Deferribacteres | o_Deferribacterales  | f_Deferribacteraceae  | g_Mucispirillum  | s_schaedleri | 0        | 2        | 15       | 14       | 0        | 3        | 4        | 0        | 0        | 1        | 1   | 30       | 6        | 10       | 4        | 0       | 0       | 1       | 1       |
| k_Bacteria | p_Firmicutes      | c_Erysipelotrichi | o_Erysipelotrichales | f_Erysipelotrichaceae | g_RFN20          | Unclassified | 0        | 2        | 7        | 3        | 4        | 4        | 4        | 6        | 10       | 2        | 0   | 0        | 10       | 13       | 2        | 3       | 4       | 8       | 9       |
| k_Bacteria | p_Firmicutes      | c_Clostridia      | o_Clostridiales      | Unclassified          | Unclassified     | Unclassified | 0        | 2        | 0        | 2        | 2        | 0        | 6        | 5        | 0        | 0        | 0   | 5        | 0        | 17       | 1        | 0       | 1       | 0       | 1       |
| k_Bacteria | p_Bacteroidetes   | c_Bacteroidia     | o_Bacteroidales      | Unclassified          | Unclassified     | Unclassified | 0        | 1        | 0        | 0        | 0        | 1        | 0        | 2        | 0        | 6        | 1   | 0        | 1        | 0        | 0        | 2       | 0       | 0       | 1       |
| k_Bacteria | p_Firmicutes      | c_Clostridia      | o_Clostridiales      | f_Ruminococcaceae     | g_Ruminococcus   | Unclassified | 0        | 1        | 4        | 4        | 0        | 0        | 5        | 8        | 2        | 3        | 1   | 2        | 5        | 0        | 0        | 0       | 1       | 7       | 5       |
| k_Bacteria | p_Bacteroidetes   | c_Bacteroidia     | o_Bacteroidales      | Unclassified          | Unclassified     | Unclassified | 0        | 3        | 0        | 2        | 0        | 0        | 0        | 0        | 0        | 0        | 0   | 0        | 0        | 0        | 0        | 0       | 3       | 4       | 0       |
| k_Bacteria | p_Firmicutes      | c_Clostridia      | o_Clostridiales      | f_Lachnospiraceae     | Unclassified     | Unclassified | 0        | 1        | 0        | 16       | 2        | 12       | 53       | 23       | 0        | 1        | 0   | 19<br>3  | 5        | 0        | 18       | 0       | 20      | 0       | 11      |

| Level_1    | Level_2         | Level_3       | Level_4         | Level_5                | Level_6          | Level_7      | ss1 | sn | sn | ss | sn | ss | sn | ss | sn | ss2 | ss2 | ss | sn | sn | sn | ss | ss | sn |    |
|------------|-----------------|---------------|-----------------|------------------------|------------------|--------------|-----|----|----|----|----|----|----|----|----|-----|-----|----|----|----|----|----|----|----|----|
|            |                 |               |                 |                        |                  |              | 0   | 15 | 16 | 19 | 20 | 21 | 25 | 26 | 27 | 8   |     | 30 | 31 | 35 | 36 | 5  | 6  | 8  | 9  |
| k_Bacteria | p_Bacteroidetes | c_Bacteroidia | o_Bacteroidales | f_[Paraprevotellaceae] | g_Paraprevotella | Unclassified | 0   | 3  | 4  | 1  | 23 | 14 | 19 | 29 | 27 | 0   | 6   | 3  | 0  | 6  | 3  | 27 | 70 | 91 | 15 |
| k_Bacteria | p_Firmicutes    | c_Clostridia  | o_Clostridiales | Unclassified           | Unclassified     | Unclassified | 0   | 3  | 0  | 14 | 0  | 22 | 0  | 0  | 0  | 0   | 0   | 0  | 5  | 2  | 1  | 44 | 85 | 11 | 39 |
| k_Bacteria | p_Bacteroidetes | c_Bacteroidia | o_Bacteroidales | Unclassified           | Unclassified     | Unclassified | 0   | 3  | 94 | 67 | 40 | 18 | 33 | 2  | 30 | 21  | 9   | 5  | 10 | 30 | 40 | 20 | 7  | 57 | 33 |
| k_Bacteria | p_Firmicutes    | c_Clostridia  | o_Clostridiales | f_Ruminococaceae       | g_Oscillospira   | Unclassified | 0   | 1  | 1  | 0  | 0  | 0  | 0  | 0  | 0  | 0   | 0   | 0  | 2  | 0  | 2  | 0  | 2  | 0  | 0  |
| k_Bacteria | Unclassified    | Unclassified  | Unclassified    | Unclassified           | Unclassified     | Unclassified | 0   | 1  | 0  | 3  | 0  | 0  | 12 | 2  | 0  | 9   | 0   | 0  | 0  | 47 | 9  | 0  | 0  | 1  | 0  |
| k_Bacteria | Unclassified    | Unclassified  | Unclassified    | Unclassified           | Unclassified     | Unclassified | 0   | 1  | 0  | 2  | 0  | 0  | 14 | 3  | 0  | 0   | 0   | 0  | 0  | 0  | 0  | 0  | 8  | 2  | 0  |
| k_Bacteria | Unclassified    | Unclassified  | Unclassified    | Unclassified           | Unclassified     | Unclassified | 0   | 1  | 0  | 0  | 0  | 0  | 0  | 0  | 0  | 0   | 0   | 0  | 0  | 0  | 0  | 0  | 0  | 3  | 0  |
| k_Bacteria | p_Firmicutes    | c_Clostridia  | o_Clostridiales | Unclassified           | Unclassified     | Unclassified | 0   | 1  | 0  | 0  | 3  | 1  | 0  | 7  | 3  | 0   | 1   | 19 | 0  | 1  | 3  | 0  | 1  | 0  | 2  |
| k_Bacteria | Unclassified    | Unclassified  | Unclassified    | Unclassified           | Unclassified     | Unclassified | 0   | 1  | 0  | 0  | 0  | 2  | 0  | 0  | 6  | 0   | 0   | 59 | 24 | 0  | 32 | 0  | 0  | 0  | 2  |
| k_Bacteria | p_Tenericutes   | c_Mollicutes  | o_RF39          | Unclassified           | Unclassified     | Unclassified | 0   | 1  | 0  | 1  | 0  | 0  | 0  | 0  | 0  | 0   | 3   | 0  | 1  | 8  | 5  | 0  | 8  | 6  | 3  |
| k_Bacteria | p_Firmicutes    | c_Clostridia  | o_Clostridiales | Unclassified           | Unclassified     | Unclassified | 0   | 3  | 0  | 0  | 0  | 0  | 0  | 0  | 0  | 0   | 0   | 0  | 0  | 0  | 0  | 0  | 0  | 0  | 0  |
| k_Bacteria | Unclassified    | Unclassified  | Unclassified    | Unclassified           | Unclassified     | Unclassified | 0   | 1  | 0  | 0  | 0  | 0  | 1  | 0  | 0  | 0   | 0   | 0  | 0  | 0  | 0  | 0  | 3  | 0  | 0  |
| k_Bacteria | p_Bacteroidetes | c_Bacteroidia | o_Bacteroidales | f_[Paraprevotellaceae] | Unclassified     | Unclassified | 0   | 1  | 0  | 0  | 0  | 0  | 4  | 0  | 0  | 0   | 2   | 0  | 0  | 0  | 0  | 0  | 0  | 6  | 0  |
| k_Bacteria | p_Firmicutes    | c_Clostridia  | o_Clostridiales | f_Veillonellaceae      | Unclassified     | Unclassified | 0   | 1  | 24 | 0  | 0  | 10 | 1  | 0  | 4  | 1   | 0   | 14 | 0  | 54 | 5  | 1  | 0  | 0  | 0  |

| Level_1    | Level_2          | Level_3          | Level_4            | Level_5              | Level_6      | Level_7      | ss10 | sn15 | sn16 | ss19 | sn20 | ss21 | ss25 | sn26 | sn27 | ss28 | ss2 | ss30 | sn31 | sn35 | sn36 | sn5 | ss6 | ss8 | sn9 |
|------------|------------------|------------------|--------------------|----------------------|--------------|--------------|------|------|------|------|------|------|------|------|------|------|-----|------|------|------|------|-----|-----|-----|-----|
| k_Bacteria | p_Firmicutes     | c_Clostridia     | o_Clostridiales    | f_Ruminococaceae     | Unclassified | Unclassified | 0    | 2    | 25   | 11   | 0    | 4    | 2    | 0    | 2    | 5    | 7   | 1    | 3    | 12   | 4    | 1   | 5   | 0   | 1   |
| k_Bacteria | p_Firmicutes     | c_Clostridia     | o_Clostridiales    | Unclassified         | Unclassified | Unclassified | 0    | 1    | 39   | 5    | 21   | 14   | 27   | 29   | 14   | 0    | 13  | 44   | 27   | 31   | 21   | 4   | 30  | 75  | 25  |
| k_Bacteria | p_Firmicutes     | c_Clostridia     | o_Clostridiales    | Unclassified         | Unclassified | Unclassified | 0    | 1    | 8    | 0    | 0    | 0    | 0    | 0    | 0    | 0    | 0   | 0    | 0    | 3    | 0    | 0   | 1   | 0   | 0   |
| k_Bacteria | p_Tenericutes    | c_Mollicutes     | o_RF39             | Unclassified         | Unclassified | Unclassified | 0    | 1    | 0    | 2    | 0    | 0    | 0    | 0    | 45   | 0    | 81  | 0    | 4    | 0    | 29   | 5   | 0   | 2   | 7   |
| k_Bacteria | p_Cyanobacteria  | c_4C0d-2         | o_YS2              | Unclassified         | Unclassified | Unclassified | 0    | 2    | 63   | 0    | 0    | 0    | 0    | 3    | 22   | 96   | 5   | 0    | 0    | 6    | 61   | 16  | 0   | 0   | 2   |
| k_Bacteria | p_Firmicutes     | c_Clostridia     | o_Clostridiales    | f_[Mogibacteriaceae] | Unclassified | Unclassified | 0    | 1    | 0    | 5    | 0    | 1    | 1    | 2    | 4    | 3    | 1   | 6    | 1    | 3    | 0    | 1   | 2   | 2   | 0   |
| k_Bacteria | p_Firmicutes     | c_Clostridia     | o_Clostridiales    | Unclassified         | Unclassified | Unclassified | 0    | 1    | 3    | 0    | 2    | 0    | 19   | 2    | 0    | 4    | 1   | 3    | 1    | 6    | 4    | 0   | 45  | 100 | 6   |
| k_Bacteria | p_Firmicutes     | c_Clostridia     | o_Clostridiales    | f_Lachnospiraceae    | Unclassified | Unclassified | 0    | 1    | 0    | 19   | 9    | 0    | 25   | 0    | 12   | 0    | 115 | 25   | 1    | 152  | 117  | 0   | 2   | 2   | 5   |
| k_Bacteria | p_Firmicutes     | c_Clostridia     | o_Clostridiales    | f_Ruminococaceae     | Unclassified | Unclassified | 0    | 1    | 1    | 0    | 0    | 2    | 3    | 2    | 1    | 1    | 1   | 0    | 0    | 34   | 0    | 1   | 1   | 0   | 2   |
| k_Bacteria | p_Actinobacteria | c_Coriobacteriia | o_Coriobacteriales | f_Coriobacteriaceae  | Unclassified | Unclassified | 0    | 1    | 0    | 0    | 0    | 0    | 0    | 0    | 0    | 1    | 1   | 0    | 0    | 0    | 0    | 0   | 1   | 0   | 0   |
| k_Bacteria | p_Firmicutes     | c_Clostridia     | o_Clostridiales    | Unclassified         | Unclassified | Unclassified | 0    | 1    | 0    | 6    | 0    | 0    | 0    | 0    | 0    | 49   | 0   | 1    | 0    | 0    | 0    | 0   | 0   | 0   | 0   |
| k_Bacteria | p_Firmicutes     | c_Clostridia     | o_Clostridiales    | Unclassified         | Unclassified | Unclassified | 0    | 1    | 0    | 0    | 0    | 1    | 0    | 1    | 0    | 0    | 0   | 0    | 0    | 1    | 0    | 0   | 0   | 0   | 0   |
| k_Bacteria | p_Firmicutes     | c_Clostridia     | o_Clostridiales    | f_Ruminococaceae     | Unclassified | Unclassified | 0    | 1    | 0    | 1    | 1    | 1    | 0    | 2    | 3    | 0    | 1   | 0    | 0    | 0    | 0    | 0   | 0   | 0   | 0   |
| k_Bacteria | p_Firmicutes     | c_Clostridia     | o_Clostridiales    | f_Ruminococaceae     | Unclassified | Unclassified | 0    | 1    | 0    | 4    | 0    | 0    | 0    | 0    | 1    | 0    | 0   | 4    | 0    | 0    | 0    | 0   | 0   | 4   | 0   |

| Level_1    | Level_2          | Level_3               | Level_4              | Level_5               | Level_6       | Level_7      | ss1<br>0 | sn<br>15 | sn<br>16 | ss<br>19 | sn<br>20 | ss<br>21 | ss<br>25 | sn<br>26 | sn<br>27 | ss2<br>8 | ss2 | ss<br>30 | sn<br>31 | sn<br>35 | sn<br>36 | sn<br>5 | ss<br>6 | ss<br>8 | sn<br>9 |
|------------|------------------|-----------------------|----------------------|-----------------------|---------------|--------------|----------|----------|----------|----------|----------|----------|----------|----------|----------|----------|-----|----------|----------|----------|----------|---------|---------|---------|---------|
| k_Bacteria | p_Firmicutes     | c_Clostridia          | o_Clostridiales      | f_Lachnospiraceae     | Unclassified  | Unclassified | 0        | 1        | 0        | 0        | 0        | 0        | 1        | 1        | 2        | 0        | 0   | 1        | 0        | 1        | 2        | 1       | 0       | 0       | 1       |
| k_Bacteria | p_Firmicutes     | c_Clostridia          | o_Clostridiales      | Unclassified          | Unclassified  | Unclassified | 0        | 2        | 2        | 8        | 0        | 5        | 9        | 3        | 4        | 36       | 6   | 5        | 7        | 1        | 51       | 0       | 2       | 2       | 6       |
| k_Bacteria | p_Bacteroidetes  | c_Bacteroidia         | o_Bacteroidales      | f_Prevotellaceae      | g_Prevotellae | Unclassified | 0        | 1        | 0        | 0        | 1        | 0        | 4        | 3        | 3        | 0        | 0   | 1        | 2        | 2        | 2        | 1       | 3       | 3       | 5       |
| k_Bacteria | p_Firmicutes     | c_Clostridia          | o_Clostridiales      | Unclassified          | Unclassified  | Unclassified | 0        | 1        | 0        | 4        | 0        | 0        | 2        | 0        | 0        | 0        | 0   | 0        | 0        | 0        | 0        | 0       | 0       | 0       | 0       |
| k_Bacteria | p_Proteobacteria | c_Deltaproteobacteria | o_Desulfovibrionales | f_Desulfovibrionaceae | Unclassified  | Unclassified | 0        | 1        | 3        | 0        | 0        | 0        | 0        | 0        | 0        | 0        | 0   | 1        | 0        | 2        | 0        | 0       | 0       | 0       | 0       |
| k_Bacteria | p_Firmicutes     | c_Clostridia          | o_Clostridiales      | Unclassified          | Unclassified  | Unclassified | 0        | 2        | 4        | 0        | 1        | 0        | 0        | 2        | 0        | 7        | 0   | 0        | 0        | 4        | 0        | 0       | 0       | 1       | 0       |
| k_Bacteria | p_Tenericutes    | c_Mollicutes          | o_RF39               | Unclassified          | Unclassified  | Unclassified | 0        | 1        | 0        | 1        | 0        | 5        | 0        | 0        | 0        | 0        | 0   | 0        | 2        | 0        | 5        | 0       | 0       | 6       | 0       |
| k_Bacteria | p_Firmicutes     | c_Clostridia          | o_Clostridiales      | Unclassified          | Unclassified  | Unclassified | 0        | 1        | 45       | 0        | 0        | 0        | 0        | 0        | 0        | 0        | 0   | 0        | 0        | 0        | 0        | 0       | 0       | 0       | 0       |
| k_Bacteria | p_Firmicutes     | c_Clostridia          | o_Clostridiales      | Unclassified          | Unclassified  | Unclassified | 0        | 1        | 0        | 0        | 0        | 0        | 0        | 0        | 3        | 0        | 0   | 2        | 0        | 4        | 3        | 0       | 0       | 0       | 0       |
| k_Bacteria | p_Firmicutes     | c_Clostridia          | o_Clostridiales      | Unclassified          | Unclassified  | Unclassified | 0        | 1        | 0        | 0        | 0        | 0        | 0        | 6        | 0        | 0        | 0   | 0        | 2        | 0        | 0        | 0       | 0       | 0       | 0       |
| k_Bacteria | p_Firmicutes     | c_Clostridia          | o_Clostridiales      | Unclassified          | Unclassified  | Unclassified | 0        | 1        | 0        | 8        | 0        | 2        | 3        | 0        | 0        | 0        | 1   | 26       | 9        | 3        | 4        | 0       | 2       | 1       | 1       |
| k_Bacteria | p_Firmicutes     | c_Clostridia          | o_Clostridiales      | f_Lachnospiraceae     | Unclassified  | Unclassified | 0        | 1        | 0        | 0        | 0        | 1        | 0        | 0        | 0        | 0        | 0   | 0        | 0        | 1        | 0        | 0       | 0       | 0       | 6       |
| k_Bacteria | p_Firmicutes     | c_Clostridia          | o_Clostridiales      | Unclassified          | Unclassified  | Unclassified | 0        | 1        | 7        | 0        | 1        | 3        | 2        | 5        | 3        | 0        | 1   | 0        | 6        | 14       | 2        | 0       | 1       | 44      | 9       |
| k_Bacteria | p_Bacteroidetes  | c_Bacteroidia         | o_Bacteroidales      | f_[Odoribacteraceae]  | g_Odoribacter | Unclassified | 0        | 2        | 4        | 11       | 1        | 0        | 1        | 5        | 2        | 1        | 5   | 11       | 0        | 25       | 0        | 0       | 0       | 0       | 0       |

| Level_1    | Level_2          | Level_3               | Level_4              | Level_5               | Level_6        | Level_7      | ss10 | sn15 | sn16 | ss19 | sn20 | ss21 | ss25 | sn26 | sn27 | ss28 | ss2 | ss30 | sn31 | sn35 | sn36 | sn5 | ss6 | ss8 | sn9 |
|------------|------------------|-----------------------|----------------------|-----------------------|----------------|--------------|------|------|------|------|------|------|------|------|------|------|-----|------|------|------|------|-----|-----|-----|-----|
| k_Bacteria | p_Firmicutes     | c_Clostridia          | o_Clostridiales      | f_Ruminococaceae      | g_Oscillospira | Unclassified | 0    | 1    | 1    | 0    | 1    | 0    | 0    | 0    | 2    | 0    | 0   | 0    | 0    | 7    | 2    | 0   | 0   | 1   | 0   |
| k_Bacteria | p_Firmicutes     | c_Clostridia          | o_Clostridiales      | Unclassified          | Unclassified   | Unclassified | 0    | 1    | 0    | 0    | 1    | 0    | 0    | 0    | 0    | 0    | 1   | 0    | 2    | 0    | 0    | 2   | 1   | 4   | 0   |
| k_Bacteria | p_Proteobacteria | c_Deltaproteobacteria | o_Desulfotribionales | f_Desulfotribionaceae | Unclassified   | Unclassified | 0    | 1    | 12   | 6    | 6    | 0    | 0    | 0    | 0    | 0    | 0   | 0    | 0    | 2    | 0    | 0   | 8   | 2   | 0   |
| k_Bacteria | p_Firmicutes     | c_Clostridia          | o_Clostridiales      | f_Lachnospiraceae     | Unclassified   | Unclassified | 0    | 0    | 1163 | 12   | 0    | 0    | 0    | 0    | 0    | 0    | 1   | 1    | 0    | 3    | 30   | 1   | 0   | 0   | 399 |
| k_Bacteria | p_Firmicutes     | c_Clostridia          | o_Clostridiales      | Unclassified          | Unclassified   | Unclassified | 0    | 0    | 34   | 10   | 0    | 0    | 0    | 0    | 0    | 0    | 1   | 0    | 0    | 0    | 0    | 1   | 0   | 36  | 9   |
| k_Bacteria | p_Firmicutes     | c_Clostridia          | o_Clostridiales      | Unclassified          | Unclassified   | Unclassified | 0    | 0    | 10   | 5    | 3    | 0    | 14   | 22   | 9    | 0    | 2   | 10   | 0    | 4    | 6    | 4   | 0   | 4   | 9   |
| k_Bacteria | p_Firmicutes     | c_Clostridia          | o_Clostridiales      | f_Ruminococaceae      | Unclassified   | Unclassified | 0    | 0    | 53   | 7    | 0    | 0    | 10   | 5    | 0    | 0    | 12  | 2    | 0    | 24   | 1    | 4   | 45  | 7   | 3   |
| k_Bacteria | p_Firmicutes     | c_Clostridia          | o_Clostridiales      | Unclassified          | Unclassified   | Unclassified | 0    | 0    | 4    | 1    | 2    | 0    | 0    | 1    | 1    | 1    | 1   | 12   | 1    | 6    | 0    | 1   | 0   | 1   | 1   |
| k_Bacteria | p_Bacteroidetes  | c_Bacteroidia         | o_Bacteroidales      | f_S24-7               | Unclassified   | Unclassified | 0    | 0    | 29   | 0    | 0    | 0    | 9    | 0    | 0    | 3    | 32  | 0    | 0    | 0    | 0    | 0   | 0   | 100 | 99  |
| k_Bacteria | p_Cyanobacteria  | c_4C0d-2              | o_YS2                | Unclassified          | Unclassified   | Unclassified | 0    | 0    | 20   | 0    | 0    | 0    | 0    | 1    | 0    | 0    | 1   | 0    | 0    | 134  | 29   | 0   | 0   | 0   | 0   |
| k_Bacteria | Unclassified     | Unclassified          | Unclassified         | Unclassified          | Unclassified   | Unclassified | 0    | 0    | 12   | 1    | 1    | 0    | 5    | 6    | 1    | 0    | 0   | 6    | 1    | 0    | 0    | 0   | 0   | 0   | 4   |
| k_Bacteria | p_Firmicutes     | c_Clostridia          | o_Clostridiales      | f_Ruminococaceae      | Unclassified   | Unclassified | 0    | 0    | 4    | 1    | 0    | 0    | 0    | 0    | 0    | 0    | 0   | 4    | 1    | 1    | 1    | 0   | 1   | 0   | 2   |
| k_Bacteria | p_Bacteroidetes  | c_Bacteroidia         | o_Bacteroidales      | f_Prevotellaceae      | g_Prevotella   | Unclassified | 0    | 0    | 22   | 0    | 0    | 0    | 0    | 0    | 23   | 53   | 0   | 0    | 0    | 0    | 106  | 0   | 0   | 0   | 0   |
| k_Bacteria | p_Proteobacteria | c_Deltaproteobacteria | o_Desulfotribionales | f_Desulfotribionaceae | Unclassified   | Unclassified | 0    | 0    | 4    | 12   | 1    | 1    | 0    | 0    | 0    | 0    | 0   | 27   | 1    | 5    | 1    | 1   | 1   | 0   | 2   |

| Level_1    | Level_2           | Level_3               | Level_4         | Level_5               | Level_6            | Level_7       | ss1 | sn | sn | ss | sn | ss | sn | ss   | sn | ss2 | ss2 | ss | sn | sn | sn | ss | ss | sn  |    |
|------------|-------------------|-----------------------|-----------------|-----------------------|--------------------|---------------|-----|----|----|----|----|----|----|------|----|-----|-----|----|----|----|----|----|----|-----|----|
|            |                   |                       |                 |                       |                    |               | 0   | 15 | 16 | 19 | 20 | 21 | 25 | 26   | 27 | 8   |     | 30 | 31 | 35 | 36 | 5  | 6  | 8   | 9  |
| k_Bacteria | p_Verrucomicrobia | c_Verrucos            | o_WCHB1-41      | f_RFP12               | Unclassified       | Unclassified  | 0   | 0  | 15 | 0  | 0  | 1  | 0  | 0    | 1  | 0   | 0   | 0  | 1  | 0  | 0  | 0  | 0  | 1   | 0  |
| k_Bacteria | p_Proteobacteria  | c_Alphaproteobacteria | o_RF32          | Unclassified          | Unclassified       | Unclassified  | 0   | 0  | 14 | 0  | 0  | 0  | 0  | 0    | 0  | 0   | 0   | 5  | 0  | 0  | 0  | 0  | 0  | 0   | 0  |
| k_Bacteria | p_Tenerificutes   | c_Mollicutes          | o_RF39          | Unclassified          | Unclassified       | Unclassified  | 0   | 0  | 6  | 0  | 0  | 0  | 0  | 0    | 0  | 0   | 0   | 0  | 0  | 0  | 0  | 0  | 0  | 28  | 0  |
| k_Bacteria | p_Bacteroidetes   | c_Bacteroidia         | o_Bacteroidales | f_S24-7               | Unclassified       | Unclassified  | 0   | 0  | 10 | 1  | 0  | 3  | 0  | 14   | 1  | 0   | 0   | 1  | 0  | 0  | 5  | 0  | 0  | 4   | 6  |
| k_Bacteria | p_Bacteroidetes   | c_Bacteroidia         | o_Bacteroidales | f_Prevotellaceae      | g_Prevotella       | Unclassified  | 0   | 0  | 2  | 2  | 1  | 0  | 0  | 0    | 0  | 1   | 1   | 1  | 0  | 0  | 0  | 0  | 0  | 0   | 3  |
| k_Bacteria | p_Proteobacteria  | c_Gammaproteobacteria | o_Aeromonadales | f_Succinivibrionaceae | g_Anaerospirillum  | Unclassified  | 0   | 0  | 14 | 0  | 0  | 9  | 2  | 0    | 2  | 0   | 0   | 6  | 5  | 1  | 2  | 4  | 0  | 2   | 0  |
| k_Bacteria | p_Firmicutes      | c_Clostridia          | o_Clostridiales | Unclassified          | Unclassified       | Unclassified  | 0   | 0  | 5  | 4  | 0  | 0  | 0  | 0    | 0  | 1   | 0   | 7  | 1  | 5  | 0  | 0  | 1  | 2   | 3  |
| k_Bacteria | p_Firmicutes      | c_Clostridia          | o_Clostridiales | f_Ruminococaceae      | g_Faecalibacterium | s_prausnitzii | 0   | 0  | 2  | 0  | 0  | 0  | 2  | 0    | 0  | 3   | 1   | 0  | 0  | 1  | 0  | 17 | 0  | 0   | 0  |
| k_Bacteria | p_Bacteroidetes   | c_Bacteroidia         | o_Bacteroidales | f_S24-7               | Unclassified       | Unclassified  | 0   | 0  | 20 | 47 | 22 | 1  | 30 | 98   | 0  | 14  | 0   | 0  | 2  | 2  | 14 | 26 | 0  | 0   | 24 |
| k_Bacteria | p_Firmicutes      | c_Clostridia          | o_Clostridiales | f_Lachnospiraceae     | Unclassified       | Unclassified  | 0   | 0  | 3  | 1  | 0  | 0  | 0  | 0    | 0  | 0   | 0   | 2  | 0  | 0  | 1  | 0  | 0  | 0   | 0  |
| k_Bacteria | p_Firmicutes      | c_Clostridia          | o_Clostridiales | f_Ruminococaceae      | Unclassified       | Unclassified  | 0   | 0  | 3  | 4  | 0  | 0  | 1  | 3    | 0  | 0   | 0   | 1  | 1  | 0  | 0  | 0  | 0  | 2   | 0  |
| k_Bacteria | p_Bacteroidetes   | c_Bacteroidia         | o_Bacteroidales | f_S24-7               | Unclassified       | Unclassified  | 0   | 0  | 40 | 0  | 0  | 0  | 4  | 1528 | 0  | 3   | 27  | 0  | 0  | 0  | 23 | 14 | 0  | 184 | 20 |
| k_Bacteria | p_Bacteroidetes   | c_Bacteroidia         | o_Bacteroidales | f_Prevotellaceae      | g_Prevotella       | Unclassified  | 0   | 0  | 8  | 0  | 0  | 0  | 0  | 0    | 0  | 0   | 0   | 4  | 6  | 0  | 0  | 2  | 0  | 0   | 0  |
| k_Bacteria | Unclassified      | Unclassified          | Unclassified    | Unclassified          | Unclassified       | Unclassified  | 0   | 0  | 7  | 19 | 0  | 1  | 0  | 17   | 1  | 0   | 0   | 4  | 0  | 13 | 0  | 0  | 0  | 0   | 1  |

| Level_1    | Level_2          | Level_3              | Level_4              | Level_5               | Level_6        | Level_7      | ss1<br>0 | sn<br>15 | sn<br>16 | ss<br>19 | sn<br>20 | ss<br>21 | ss<br>25 | sn<br>26 | sn<br>27 | ss2<br>8 | ss2 | ss<br>30 | sn<br>31 | sn<br>35 | sn<br>36 | sn<br>5 | ss<br>6 | ss<br>8 | sn<br>9 |    |   |
|------------|------------------|----------------------|----------------------|-----------------------|----------------|--------------|----------|----------|----------|----------|----------|----------|----------|----------|----------|----------|-----|----------|----------|----------|----------|---------|---------|---------|---------|----|---|
| k_Bacteria | p_Bacteroidetes  | c_Bacteroidia        | o_Bacteroidales      | Unclassified          | Unclassified   | Unclassified | 0        | 0        | 2        | 0        | 0        | 0        | 0        | 0        | 0        | 0        | 0   | 0        | 0        | 0        | 0        | 0       | 0       | 0       | 0       |    |   |
| k_Bacteria | p_Firmicutes     | c_Clostridia         | o_Clostridiales      | Unclassified          | Unclassified   | Unclassified | 0        | 0        | 3        | 0        | 0        | 0        | 0        | 0        | 0        | 0        | 0   | 31       | 0        | 1        | 0        | 0       | 0       | 0       | 0       |    |   |
| k_Bacteria | p_Firmicutes     | c_Erysipelotrichi    | o_Erysipelotrichales | f_Erysipelotrichaceae | g_p-75-a5      | Unclassified | 0        | 0        | 8        | 0        | 2        | 0        | 1        | 11       | 10       | 0        | 2   | 2        | 1        | 5        | 1        | 0       | 7       | 0       | 1       |    |   |
| k_Bacteria | p_Bacteroidetes  | c_Bacteroidia        | o_Bacteroidales      | f_S24-7               | Unclassified   | Unclassified | 0        | 0        | 4        | 5        | 0        | 3        | 3        | 0        | 20       | 1        | 0   | 8        | 2        | 0        | 0        | 0       | 3       | 0       | 1       |    |   |
| k_Bacteria | p_Firmicutes     | c_Clostridia         | o_Clostridiales      | f_Lachnospiraceae     | Unclassified   | Unclassified | 0        | 0        | 8        | 1        | 1        | 0        | 1        | 4        | 1        | 0        | 0   | 3        | 0        | 0        | 1        | 1       | 0       | 0       | 0       |    |   |
| k_Bacteria | p_Firmicutes     | c_Clostridia         | o_Clostridiales      | f_Ruminococcaceae     | g_Oscillospira | Unclassified | 0        | 0        | 3        | 10       | 2        | 2        | 16       | 8        | 5        | 1        | 0   | 7        | 4        | 1        | 3        | 0       | 10      | 2       | 6       |    |   |
| k_Bacteria | p_Firmicutes     | c_Clostridia         | o_Clostridiales      | Unclassified          | Unclassified   | Unclassified | 0        | 0        | 2        | 1        | 0        | 1        | 0        | 1        | 0        | 1        | 0   | 7        | 1        | 1        | 0        | 1       | 0       | 0       | 0       |    |   |
| k_Bacteria | p_Firmicutes     | c_Clostridia         | o_Clostridiales      | f_Ruminococcaceae     | Unclassified   | Unclassified | 0        | 0        | 12       | 5        | 26       | 12       | 0        | 34       | 0        | 3        | 14  | 0        | 0        | 10       | 2        | 6       | 0       | 1       | 0       |    |   |
| k_Bacteria | p_Firmicutes     | c_Clostridia         | o_Clostridiales      | Unclassified          | Unclassified   | Unclassified | 0        | 0        | 7        | 0        | 0        | 0        | 1        | 2        | 0        | 2        | 0   | 0        | 0        | 1        | 0        | 0       | 0       | 0       | 0       |    |   |
| k_Bacteria | p_Firmicutes     | c_Clostridia         | o_Clostridiales      | Unclassified          | Unclassified   | Unclassified | 0        | 0        | 5        | 26       | 3        | 0        | 3        | 1        | 0        | 0        | 21  | 23       | 7        | 2        | 36       | 49      | 0       | 0       | 80      | 13 | 4 |
| k_Bacteria | p_Firmicutes     | c_Clostridia         | o_Clostridiales      | f_Ruminococcaceae     | Unclassified   | Unclassified | 0        | 0        | 2        | 4        | 1        | 2        | 0        | 0        | 3        | 0        | 1   | 0        | 0        | 0        | 1        | 2       | 1       | 2       | 0       |    |   |
| k_Bacteria | p_Proteobacteria | c_Betaproteobacteria | o_Burkholderiales    | f_Alcaligenaceae      | g_Sutterella   | Unclassified | 0        | 0        | 5        | 0        | 0        | 0        | 6        | 2        | 0        | 1        | 0   | 0        | 0        | 14       | 6        | 0       | 0       | 0       | 0       |    |   |
| k_Bacteria | Unclassified     | Unclassified         | Unclassified         | Unclassified          | Unclassified   | Unclassified | 0        | 0        | 6        | 0        | 0        | 6        | 0        | 6        | 0        | 2        | 3   | 4        | 0        | 0        | 22       | 0       | 0       | 0       | 0       |    |   |
| k_Bacteria | p_Firmicutes     | c_Clostridia         | o_Clostridiales      | f_Lachnospiraceae     | Unclassified   | Unclassified | 0        | 0        | 2        | 0        | 5        | 1        | 2        | 2        | 1        | 0        | 0   | 1        | 0        | 0        | 0        | 2       | 3       | 0       | 0       |    |   |



| Level_1    | Level_2          | Level_3              | Level_4              | Level_5               | Level_6          | Level_7      | ss1<br>0 | sn<br>15 | sn<br>16 | ss<br>19 | sn<br>20 | ss<br>21 | ss<br>25 | sn<br>26 | sn<br>27 | ss2<br>8 | ss2 | ss<br>30 | sn<br>31 | sn<br>35 | sn<br>36 | sn<br>5 | ss<br>6 | ss<br>8 | sn<br>9 |
|------------|------------------|----------------------|----------------------|-----------------------|------------------|--------------|----------|----------|----------|----------|----------|----------|----------|----------|----------|----------|-----|----------|----------|----------|----------|---------|---------|---------|---------|
| k_Bacteria | p_Proteobacteria | c_Betaproteobacteria | o_Burkholderiales    | f_Comamonadaceae      | Unclassified     | Unclassified | 0        | 0        | 2        | 0        | 1        | 0        | 0        | 0        | 0        | 0        | 0   | 2        | 0        | 0        | 1        | 1       | 0       | 1       | 0       |
| k_Bacteria | p_Firmicutes     | c_Clostridia         | o_Clostridiales      | f_Ruminococcaceae     | g_Ruminococcus   | s_callidus   | 0        | 0        | 6        | 0        | 0        | 0        | 0        | 0        | 17       | 0        | 1   | 0        | 0        | 0        | 16       | 0       | 36      | 0       | 0       |
| k_Bacteria | p_Actinobacteria | c_Coriobacteriia     | o_Coriobacteriales   | f_Coriobacteriaceae   | g_Collinsella    | Unclassified | 0        | 0        | 1        | 1        | 0        | 1        | 0        | 0        | 2        | 1        | 0   | 0        | 0        | 0        | 0        | 0       | 0       | 1       | 0       |
| k_Bacteria | p_Firmicutes     | c_Clostridia         | o_Clostridiales      | f_Lachnospiraceae     | Unclassified     | Unclassified | 0        | 0        | 2        | 7        | 0        | 2        | 0        | 0        | 1        | 0        | 0   | 1        | 0        | 3        | 1        | 0       | 0       | 0       | 0       |
| k_Bacteria | p_Firmicutes     | c_Clostridia         | o_Clostridiales      | f_Ruminococcaceae     | g_Ruminococcus   | Unclassified | 0        | 0        | 1        | 0        | 0        | 0        | 2        | 0        | 0        | 1        | 0   | 0        | 0        | 0        | 0        | 0       | 0       | 0       | 0       |
| k_Bacteria | p_Firmicutes     | c_Clostridia         | o_Clostridiales      | f_Lachnospiraceae     | g_[Ruminococcus] | s_gnavus     | 0        | 0        | 10       | 0        | 1        | 0        | 0        | 1        | 1        | 0        | 1   | 14       | 2        | 3        | 0        | 0       | 0       | 0       | 0       |
| k_Bacteria | Unclassified     | Unclassified         | Unclassified         | Unclassified          | Unclassified     | Unclassified | 0        | 0        | 5        | 0        | 0        | 0        | 0        | 0        | 7        | 0        | 7   | 1        | 5        | 0        | 0        | 0       | 0       | 3       | 0       |
| k_Bacteria | p_Tenericutes    | c_Mollicutes         | o_RF39               | Unclassified          | Unclassified     | Unclassified | 0        | 0        | 1        | 0        | 0        | 0        | 0        | 0        | 0        | 0        | 3   | 0        | 0        | 1        | 0        | 0       | 0       | 0       | 1       |
| k_Bacteria | p_Bacteroidetes  | c_Bacteroidia        | o_Bacteroidales      | Unclassified          | Unclassified     | Unclassified | 0        | 0        | 4        | 0        | 0        | 0        | 1        | 1        | 0        | 5        | 0   | 0        | 0        | 0        | 4        | 0       | 0       | 0       | 0       |
| k_Bacteria | p_Firmicutes     | c_Clostridia         | o_Clostridiales      | f_Ruminococcaceae     | Unclassified     | Unclassified | 0        | 0        | 4        | 5        | 0        | 0        | 0        | 0        | 0        | 0        | 1   | 5        | 1        | 2        | 0        | 1       | 2       | 2       | 0       |
| k_Bacteria | p_Firmicutes     | c_Clostridia         | o_Clostridiales      | Unclassified          | Unclassified     | Unclassified | 0        | 0        | 4        | 0        | 0        | 0        | 0        | 0        | 0        | 0        | 0   | 0        | 0        | 2        | 0        | 0       | 0       | 23      | 1       |
| k_Bacteria | p_Bacteroidetes  | c_Bacteroidia        | o_Bacteroidales      | f_S24-7               | Unclassified     | Unclassified | 0        | 0        | 3        | 0        | 0        | 12       | 21       | 53       | 2        | 8        | 0   | 3        | 1        | 0        | 2        | 27      | 0       | 0       | 33      |
| k_Bacteria | p_Firmicutes     | c_Erysipelotrichi    | o_Erysipelotrichales | f_Erysipelotrichaceae | g_Allobaculum    | Unclassified | 0        | 0        | 5        | 15       | 5        | 8        | 1        | 6        | 4        | 1        | 0   | 0        | 1        | 0        | 9        | 0       | 0       | 0       | 12      |
| k_Bacteria | p_Firmicutes     | c_Clostridia         | o_Clostridiales      | f_Lachnospiraceae     | Unclassified     | Unclassified | 0        | 0        | 1        | 2        | 0        | 0        | 0        | 0        | 0        | 1        | 1   | 5        | 0        | 10       | 0        | 0       | 0       | 0       | 0       |

| Level_1    | Level_2           | Level_3                | Level_4               | Level_5                | Level_6      | Level_7      | ss1<br>0 | sn<br>15 | sn<br>16 | ss<br>19 | sn<br>20 | ss<br>21 | ss<br>25 | sn<br>26 | sn<br>27 | ss2<br>8 | ss2 | ss<br>30 | sn<br>31 | sn<br>35 | sn<br>36 | sn<br>5 | ss<br>6 | ss<br>8 | sn<br>9 |
|------------|-------------------|------------------------|-----------------------|------------------------|--------------|--------------|----------|----------|----------|----------|----------|----------|----------|----------|----------|----------|-----|----------|----------|----------|----------|---------|---------|---------|---------|
| k_Bacteria | Unclassified      | Unclassified           | Unclassified          | Unclassified           | Unclassified | Unclassified | 0        | 0        | 8        | 0        | 3        | 0        | 2        | 0        | 1        | 0        | 0   | 0        | 0        | 12       | 1        | 0       | 0       | 3       | 0       |
| k_Bacteria | p__Proteobacteria | c__Deltaproteobacteria | o__Desulfotribionales | f__Desulfotribriaceae  | Unclassified | Unclassified | 0        | 0        | 1        | 0        | 1        | 1        | 0        | 0        | 0        | 0        | 0   | 1        | 0        | 2        | 2        | 0       | 0       | 3       | 0       |
| k_Bacteria | p__Firmicutes     | c__Clostridia          | o__Clostridiales      | f__Lachnospiraceae     | Unclassified | Unclassified | 0        | 0        | 2        | 1        | 3        | 1        | 2        | 2        | 1        | 0        | 0   | 3        | 0        | 0        | 0        | 1       | 1       | 0       | 0       |
| k_Bacteria | p__Firmicutes     | Unclassified           | Unclassified          | Unclassified           | Unclassified | Unclassified | 0        | 0        | 4        | 0        | 0        | 0        | 0        | 13       | 0        | 5        | 0   | 20       | 2        | 0        | 0        | 3       | 1       | 0       | 0       |
| k_Bacteria | p__Firmicutes     | c__Clostridia          | o__Clostridiales      | f__Lachnospiraceae     | Unclassified | Unclassified | 0        | 0        | 7        | 3        | 0        | 0        | 0        | 1        | 0        | 0        | 0   | 1        | 0        | 0        | 0        | 0       | 0       | 0       | 0       |
| k_Bacteria | p__Firmicutes     | c__Clostridia          | o__Clostridiales      | f__Lachnospiraceae     | Unclassified | Unclassified | 0        | 0        | 2        | 0        | 0        | 0        | 0        | 8        | 0        | 0        | 0   | 0        | 0        | 1        | 0        | 0       | 1       | 0       | 0       |
| k_Bacteria | p__Bacteroidetes  | c__Bacteroidia         | o__Bacteroidales      | f__Rikenellaceae       | Unclassified | Unclassified | 0        | 0        | 3        | 0        | 1        | 0        | 1        | 6        | 3        | 0        | 0   | 1        | 0        | 15       | 2        | 0       | 0       | 2       | 0       |
| k_Bacteria | p__Bacteroidetes  | c__Bacteroidia         | o__Bacteroidales      | f__S24-7               | Unclassified | Unclassified | 0        | 0        | 2        | 2        | 0        | 5        | 1        | 5        | 3        | 2        | 2   | 1        | 2        | 0        | 2        | 1       | 3       | 5       | 2       |
| k_Bacteria | Unclassified      | Unclassified           | Unclassified          | Unclassified           | Unclassified | Unclassified | 0        | 0        | 1        | 0        | 0        | 0        | 0        | 0        | 0        | 0        | 0   | 1        | 1        | 1        | 0        | 0       | 0       | 0       | 0       |
| k_Bacteria | p__Firmicutes     | c__Clostridia          | o__Clostridiales      | f__Ruminococcaceae     | Unclassified | Unclassified | 0        | 0        | 3        | 3        | 0        | 1        | 0        | 0        | 0        | 0        | 0   | 0        | 0        | 0        | 0        | 0       | 0       | 0       | 0       |
| k_Bacteria | p__Firmicutes     | c__Clostridia          | o__Clostridiales      | f__Ruminococcaceae     | Unclassified | Unclassified | 0        | 0        | 2        | 3        | 0        | 1        | 1        | 0        | 1        | 0        | 0   | 3        | 0        | 1        | 1        | 0       | 1       | 2       | 1       |
| k_Bacteria | p__Bacteroidetes  | c__Bacteroidia         | o__Bacteroidales      | f__S24-7               | Unclassified | Unclassified | 0        | 0        | 4        | 0        | 5        | 0        | 7        | 38       | 7        | 2        | 0   | 0        | 0        | 0        | 1        | 0       | 0       | 0       | 0       |
| k_Bacteria | p__Firmicutes     | c__Erysipelotrichi     | o__Erysipelotrichales | f__Erysipelotrichaceae | g__RFN20     | Unclassified | 0        | 0        | 2        | 2        | 0        | 2        | 0        | 0        | 3        | 2        | 0   | 2        | 0        | 0        | 0        | 0       | 0       | 0       | 1       |
| k_Bacteria | Unclassified      | Unclassified           | Unclassified          | Unclassified           | Unclassified | Unclassified | 0        | 0        | 1        | 0        | 3        | 0        | 0        | 0        | 5        | 0        | 0   | 0        | 0        | 0        | 1        | 0       | 0       | 3       | 2       |

| Level_1    | Level_2         | Level_3           | Level_4              | Level_5               | Level_6        | Level_7      | ss1<br>0 | sn<br>15 | sn<br>16 | ss<br>19 | sn<br>20 | ss<br>21 | ss<br>25 | sn<br>26 | sn<br>27 | ss2<br>8 | ss2 | ss<br>30 | sn<br>31 | sn<br>35 | sn<br>36 | sn<br>5 | ss<br>6 | ss<br>8 | sn<br>9 |
|------------|-----------------|-------------------|----------------------|-----------------------|----------------|--------------|----------|----------|----------|----------|----------|----------|----------|----------|----------|----------|-----|----------|----------|----------|----------|---------|---------|---------|---------|
| k_Bacteria | p_Firmicutes    | c_Clostridia      | o_Clostridiales      | f_Lachnospiraceae     | Unclassified   | Unclassified | 0        | 0        | 2        | 3        | 0        | 0        | 1        | 3        | 0        | 0        | 1   | 17       | 8        | 1        | 6        | 0       | 0       | 0       | 1       |
| k_Bacteria | p_Firmicutes    | c_Clostridia      | o_Clostridiales      | f_Ruminococcaceae     | Unclassified   | Unclassified | 0        | 0        | 3        | 0        | 0        | 1        | 0        | 0        | 0        | 0        | 0   | 0        | 11       | 3        | 0        | 0       | 0       | 25      | 0       |
| k_Bacteria | p_Firmicutes    | c_Clostridia      | o_Clostridiales      | f_Ruminococcaceae     | Unclassified   | Unclassified | 0        | 0        | 1        | 0        | 1        | 0        | 0        | 0        | 0        | 0        | 1   | 0        | 0        | 0        | 3        | 0       | 0       | 0       | 0       |
| k_Bacteria | p_Firmicutes    | c_Clostridia      | o_Clostridiales      | f_Lachnospiraceae     | Unclassified   | Unclassified | 0        | 0        | 2        | 4        | 1        | 1        | 2        | 1        | 0        | 0        | 1   | 4        | 1        | 3        | 2        | 1       | 0       | 0       | 0       |
| k_Bacteria | p_Bacteroidetes | c_Bacteroidia     | o_Bacteroidales      | f_S24-7               | Unclassified   | Unclassified | 0        | 0        | 2        | 0        | 1        | 9        | 1        | 6        | 1        | 1        | 0   | 1        | 0        | 0        | 2        | 0       | 0       | 0       | 0       |
| k_Bacteria | p_Firmicutes    | c_Clostridia      | o_Clostridiales      | Unclassified          | Unclassified   | Unclassified | 0        | 0        | 1        | 3        | 0        | 0        | 0        | 1        | 0        | 0        | 0   | 3        | 0        | 0        | 0        | 0       | 0       | 1       | 0       |
| k_Bacteria | p_Firmicutes    | c_Clostridia      | o_Clostridiales      | f_Lachnospiraceae     | Unclassified   | Unclassified | 0        | 0        | 1        | 24       | 19       | 9        | 0        | 0        | 0        | 0        | 0   | 0        | 0        | 3        | 1        | 0       | 0       | 1       | 0       |
| k_Bacteria | p_Firmicutes    | c_Clostridia      | o_Clostridiales      | f_Ruminococcaceae     | Unclassified   | Unclassified | 0        | 0        | 2        | 9        | 0        | 2        | 1        | 0        | 10       | 3        | 2   | 9        | 3        | 9        | 8        | 3       | 2       | 5       | 1       |
| k_Bacteria | p_Bacteroidetes | c_Bacteroidia     | o_Bacteroidales      | f_Prevotellaceae      | g_Prevotellae  | Unclassified | 0        | 0        | 2        | 0        | 0        | 0        | 0        | 0        | 0        | 0        | 0   | 0        | 0        | 0        | 0        | 0       | 0       | 1       | 0       |
| k_Bacteria | p_Firmicutes    | c_Clostridia      | o_Clostridiales      | f_Lachnospiraceae     | Unclassified   | Unclassified | 0        | 0        | 1        | 0        | 0        | 0        | 0        | 0        | 0        | 0        | 0   | 0        | 0        | 10       | 0        | 0       | 0       | 0       | 0       |
| k_Bacteria | p_Spirochaetes  | c_Spirochaetes    | o_Spirochaetales     | f_Spirochaetaeae      | Unclassified   | Unclassified | 0        | 0        | 2        | 18       | 0        | 3        | 3        | 0        | 2        | 2        | 2   | 76       | 0        | 0        | 0        | 0       | 0       | 0       | 0       |
| k_Bacteria | p_Firmicutes    | c_Clostridia      | o_Clostridiales      | f_Ruminococcaceae     | g_Ruminococcus | Unclassified | 0        | 0        | 1        | 0        | 0        | 0        | 0        | 0        | 0        | 2        | 0   | 0        | 0        | 0        | 0        | 0       | 0       | 0       | 0       |
| k_Bacteria | p_Firmicutes    | c_Erysipelotrichi | o_Erysipelotrichales | f_Erysipelotrichaceae | g_Allobaculum  | Unclassified | 0        | 0        | 3        | 8        | 0        | 2        | 0        | 0        | 5        | 0        | 0   | 0        | 1        | 0        | 1        | 0       | 0       | 1       | 7       |
| k_Bacteria | p_Firmicutes    | c_Clostridia      | o_Clostridiales      | f_Ruminococcaceae     | g_Ruminococcus | Unclassified | 0        | 0        | 1        | 3        | 31       | 0        | 0        | 15       | 0        | 0        | 0   | 0        | 0        | 1        | 0        | 0       | 0       | 0       | 26      |

| Level_1    | Level_2      | Level_3           | Level_4              | Level_5               | Level_6          | Level_7      | ss1<br>0 | sn<br>15 | sn<br>16 | ss<br>19 | sn<br>20 | ss<br>21 | ss<br>25 | sn<br>26 | sn<br>27 | ss2<br>8 | ss2 | ss<br>30 | sn<br>31 | sn<br>35 | sn<br>36 | sn<br>5 | ss<br>6 | ss<br>8 | sn<br>9 |
|------------|--------------|-------------------|----------------------|-----------------------|------------------|--------------|----------|----------|----------|----------|----------|----------|----------|----------|----------|----------|-----|----------|----------|----------|----------|---------|---------|---------|---------|
| k_Bacteria | p_Firmicutes | c_Clostridia      | o_Clostridiales      | Unclassified          | Unclassified     | Unclassified | 0        | 0        | 2        | 8        | 0        | 0        | 0        | 0        | 0        | 0        | 0   | 0        | 0        | 0        | 1        | 0       | 0       | 22      | 10      |
| k_Bacteria | p_Firmicutes | c_Clostridia      | o_Clostridiales      | f_Ruminococaceae      | g_Oscillospira   | Unclassified | 0        | 0        | 1        | 2        | 0        | 1        | 0        | 3        | 2        | 2        | 3   | 8        | 1        | 6        | 3        | 1       | 2       | 0       | 1       |
| k_Bacteria | p_Firmicutes | c_Clostridia      | o_Clostridiales      | f_Lachnospiraceae     | Unclassified     | Unclassified | 0        | 0        | 2        | 1        | 0        | 0        | 0        | 0        | 0        | 0        | 0   | 1        | 0        | 0        | 0        | 0       | 0       | 0       | 0       |
| k_Bacteria | p_Firmicutes | c_Clostridia      | o_Clostridiales      | Unclassified          | Unclassified     | Unclassified | 0        | 0        | 1        | 0        | 0        | 0        | 0        | 0        | 0        | 0        | 0   | 1        | 0        | 3        | 0        | 0       | 1       | 7       | 0       |
| k_Bacteria | p_Firmicutes | c_Erysipelotrichi | o_Erysipelotrichales | f_Erysipelotrichaceae | g_Coprobaecillus | Unclassified | 0        | 0        | 1        | 0        | 5        | 0        | 4        | 0        | 0        | 3        | 0   | 0        | 0        | 0        | 1        | 0       | 0       | 0       | 2       |
| k_Bacteria | p_Firmicutes | c_Clostridia      | o_Clostridiales      | f_Ruminococaceae      | Unclassified     | Unclassified | 0        | 0        | 1        | 8        | 0        | 0        | 0        | 0        | 0        | 0        | 1   | 2        | 0        | 0        | 0        | 0       | 0       | 0       | 0       |
| k_Bacteria | p_Firmicutes | c_Clostridia      | o_Clostridiales      | f_Lachnospiraceae     | g_Coprococcus    | Unclassified | 0        | 0        | 1        | 2        | 0        | 0        | 0        | 0        | 0        | 0        | 0   | 0        | 0        | 0        | 0        | 0       | 0       | 22      | 29      |
| k_Bacteria | p_Firmicutes | c_Clostridia      | o_Clostridiales      | f_Lachnospiraceae     | Unclassified     | Unclassified | 0        | 0        | 1        | 0        | 0        | 1        | 2        | 0        | 0        | 0        | 0   | 1        | 0        | 2        | 0        | 0       | 0       | 0       | 0       |
| k_Bacteria | p_Firmicutes | c_Clostridia      | o_Clostridiales      | f_Ruminococaceae      | Unclassified     | Unclassified | 0        | 0        | 1        | 0        | 0        | 1        | 0        | 0        | 0        | 0        | 0   | 0        | 0        | 3        | 0        | 0       | 0       | 0       | 0       |
| k_Bacteria | Unclassified | Unclassified      | Unclassified         | Unclassified          | Unclassified     | Unclassified | 0        | 0        | 1        | 0        | 0        | 0        | 5        | 0        | 0        | 0        | 0   | 0        | 0        | 0        | 0        | 0       | 0       | 0       | 0       |
| k_Bacteria | p_Firmicutes | c_Clostridia      | o_Clostridiales      | f_Ruminococaceae      | g_Oscillospira   | Unclassified | 0        | 0        | 1        | 1        | 1        | 0        | 2        | 0        | 1        | 0        | 0   | 2        | 0        | 6        | 0        | 0       | 0       | 0       | 0       |
| k_Bacteria | p_Firmicutes | c_Clostridia      | o_Clostridiales      | f_Ruminococaceae      | g_Oscillospira   | Unclassified | 0        | 0        | 1        | 0        | 2        | 0        | 4        | 9        | 0        | 0        | 0   | 5        | 2        | 0        | 0        | 0       | 1       | 5       | 4       |
| k_Bacteria | Unclassified | Unclassified      | Unclassified         | Unclassified          | Unclassified     | Unclassified | 0        | 0        | 1        | 0        | 0        | 0        | 0        | 0        | 0        | 3        | 0   | 10       | 3        | 4        | 0        | 0       | 1       | 0       | 0       |
| k_Bacteria | p_Firmicutes | c_Clostridia      | o_Clostridiales      | f_Ruminococaceae      | g_Ruminococcus   | Unclassified | 0        | 0        | 1        | 1        | 1        | 0        | 0        | 0        | 0        | 0        | 0   | 0        | 1        | 0        | 0        | 1       | 1       | 0       | 4       |

| Level_1    | Level_2         | Level_3        | Level_4          | Level_5                | Level_6         | Level_7      | ss1 | sn | sn | ss | sn | ss | sn | sn | ss2 | ss2 | ss | sn | sn | sn | ss | ss | sn | sn |    |
|------------|-----------------|----------------|------------------|------------------------|-----------------|--------------|-----|----|----|----|----|----|----|----|-----|-----|----|----|----|----|----|----|----|----|----|
| k_Bacteria | p_Bacteroidetes | c_Bacteroidia  | o_Bacteroidales  | f_[Paraprevotellaceae] | g_[Prevotellia] | Unclassified | 0   | 0  | 0  | 16 | 16 | 55 | 0  | 13 | 0   | 0   | 76 | 11 | 0  | 72 | 3  | 25 | 47 | 0  |    |
| k_Bacteria | p_Firmicutes    | c_Clostridia   | o_Clostridiales  | f_[Mogibacteriaceae]   | Unclassified    | Unclassified | 0   | 0  | 0  | 26 | 11 | 9  | 22 | 12 | 31  | 0   | 13 | 45 | 14 | 0  | 22 | 4  | 51 | 10 | 24 |
| k_Bacteria | p_Firmicutes    | c_Clostridia   | o_Clostridiales  | Unclassified           | Unclassified    | Unclassified | 0   | 0  | 0  | 53 | 0  | 50 | 0  | 0  | 0   | 0   | 62 | 14 | 0  | 0  | 0  | 0  | 15 | 15 | 6  |
| k_Bacteria | p_Bacteroidetes | c_Bacteroidia  | o_Bacteroidales  | f_Bacteroidaceae       | g_Bacteroides   | Unclassified | 0   | 0  | 0  | 41 | 88 | 4  | 94 | 0  | 0   | 7   | 0  | 0  | 1  | 0  | 0  | 0  | 0  | 0  | 1  |
| k_Bacteria | p_Bacteroidetes | Unclassified   | Unclassified     | Unclassified           | Unclassified    | Unclassified | 0   | 0  | 0  | 28 | 4  | 21 | 25 | 0  | 23  | 5   | 0  | 61 | 3  | 0  | 0  | 10 | 19 | 22 | 13 |
| k_Bacteria | p_Firmicutes    | c_Clostridia   | o_Clostridiales  | f_[Mogibacteriaceae]   | Unclassified    | Unclassified | 0   | 0  | 0  | 1  | 2  | 0  | 2  | 0  | 0   | 0   | 1  | 0  | 0  | 0  | 0  | 0  | 1  | 0  | 0  |
| k_Bacteria | p_Firmicutes    | c_Clostridia   | o_Clostridiales  | f_Lachnospiraceae      | Unclassified    | Unclassified | 0   | 0  | 0  | 52 | 0  | 6  | 0  | 26 | 0   | 0   | 0  | 45 | 0  | 0  | 0  | 0  | 2  | 0  | 0  |
| k_Bacteria | p_Tenericutes   | c_Mollicutes   | o_RF39           | Unclassified           | Unclassified    | Unclassified | 0   | 0  | 0  | 4  | 0  | 0  | 0  | 0  | 0   | 0   | 0  | 0  | 0  | 0  | 0  | 0  | 0  | 0  | 0  |
| k_Bacteria | p_Firmicutes    | c_Clostridia   | o_Clostridiales  | f_Lachnospiraceae      | g_Coproccus     | Unclassified | 0   | 0  | 0  | 11 | 0  | 0  | 0  | 0  | 2   | 0   | 0  | 0  | 37 | 0  | 0  | 32 | 0  | 4  | 45 |
| k_Bacteria | p_Bacteroidetes | c_Bacteroidia  | o_Bacteroidales  | f_[Paraprevotellaceae] | g_[Prevotellia] | Unclassified | 0   | 0  | 0  | 3  | 0  | 0  | 0  | 2  | 0   | 0   | 1  | 0  | 1  | 0  | 0  | 3  | 0  | 7  | 7  |
| k_Bacteria | p_Firmicutes    | c_Clostridia   | o_Clostridiales  | f_Ruminococcaceae      | Unclassified    | Unclassified | 0   | 0  | 0  | 2  | 0  | 0  | 0  | 1  | 0   | 0   | 0  | 0  | 3  | 0  | 0  | 0  | 0  | 3  | 1  |
| k_Bacteria | p_Bacteroidetes | c_Bacteroidia  | o_Bacteroidales  | f_Bacteroidaceae       | g_Bacteroides   | Unclassified | 0   | 0  | 0  | 4  | 0  | 0  | 0  | 0  | 0   | 0   | 0  | 0  | 0  | 0  | 0  | 0  | 1  | 0  | 1  |
| k_Bacteria | p_Firmicutes    | c_Clostridia   | o_Clostridiales  | Unclassified           | Unclassified    | Unclassified | 0   | 0  | 0  | 2  | 0  | 0  | 0  | 0  | 0   | 0   | 0  | 0  | 0  | 0  | 0  | 0  | 0  | 0  | 0  |
| k_Bacteria | p_Spirochaetes  | c_Spirochaetes | o_Spirochaetales | f_Spirochaetaeae       | Unclassified    | Unclassified | 0   | 0  | 0  | 14 | 0  | 0  | 1  | 0  | 0   | 0   | 1  | 0  | 0  | 0  | 0  | 0  | 0  | 0  | 0  |

| Level_1    | Level_2          | Level_3               | Level_4         | Level_5           | Level_6          | Level_7      | ss1<br>0 | sn<br>15 | sn<br>16 | ss<br>19 | sn<br>20 | ss<br>21 | ss<br>25 | sn<br>26 | sn<br>27 | ss2<br>8 | ss2 | ss<br>30 | sn<br>31 | sn<br>35 | sn<br>36 | sn<br>5 | ss<br>6 | ss<br>8 | sn<br>9 |
|------------|------------------|-----------------------|-----------------|-------------------|------------------|--------------|----------|----------|----------|----------|----------|----------|----------|----------|----------|----------|-----|----------|----------|----------|----------|---------|---------|---------|---------|
| k_Bacteria | p_Firmicutes     | c_Clostridia          | o_Clostridiales | f_Lachnospiraceae | g_[Ruminococcus] | s_gnavus     | 0        | 0        | 0        | 7        | 1        | 0        | 3        | 19       | 0        | 0        | 0   | 0        | 0        | 0        | 0        | 0       | 0       | 0       | 0       |
| k_Bacteria | p_Proteobacteria | c_Alphaproteobacteria | o_RF32          | Unclassified      | Unclassified     | Unclassified | 0        | 0        | 0        | 6        | 22       | 48       | 48       | 36       | 26       | 36       | 0   | 0        | 88       | 294      | 309      | 0       | 22      | 0       | 0       |
| k_Bacteria | p_Firmicutes     | c_Clostridia          | o_Clostridiales | Unclassified      | Unclassified     | Unclassified | 0        | 0        | 0        | 1        | 0        | 0        | 0        | 0        | 0        | 0        | 1   | 0        | 0        | 0        | 0        | 0       | 0       | 2       | 1       |
| k_Bacteria | p_Firmicutes     | c_Clostridia          | o_Clostridiales | f_Lachnospiraceae | Unclassified     | Unclassified | 0        | 0        | 0        | 3        | 0        | 0        | 0        | 2        | 0        | 0        | 0   | 0        | 0        | 0        | 1        | 0       | 0       | 0       | 0       |
| k_Bacteria | p_Firmicutes     | c_Clostridia          | o_Clostridiales | f_Ruminococcaceae | Unclassified     | Unclassified | 0        | 0        | 0        | 2        | 44       | 0        | 0        | 0        | 18       | 0        | 14  | 0        | 0        | 0        | 0        | 0       | 0       | 0       | 62      |
| k_Bacteria | p_Firmicutes     | c_Clostridia          | o_Clostridiales | Unclassified      | Unclassified     | Unclassified | 0        | 0        | 0        | 13       | 0        | 0        | 0        | 0        | 0        | 0        | 0   | 0        | 0        | 0        | 0        | 0       | 0       | 0       | 0       |
| k_Bacteria | p_Firmicutes     | c_Clostridia          | o_Clostridiales | f_Lachnospiraceae | Unclassified     | Unclassified | 0        | 0        | 0        | 1        | 0        | 0        | 0        | 0        | 0        | 1        | 2   | 0        | 0        | 0        | 0        | 0       | 2       | 4       | 1       |
| k_Bacteria | p_Firmicutes     | c_Clostridia          | o_Clostridiales | f_Ruminococcaceae | g_Ruminococcus   | Unclassified | 0        | 0        | 0        | 8        | 1        | 0        | 0        | 0        | 0        | 1        | 0   | 0        | 0        | 8        | 1        | 0       | 0       | 0       | 0       |
| k_Bacteria | p_Bacteroidetes  | c_Bacteroidia         | o_Bacteroidales | f_S24-7           | Unclassified     | Unclassified | 0        | 0        | 0        | 25       | 3        | 0        | 20       | 100      | 0        | 15       | 53  | 0        | 0        | 33       | 93       | 8       | 0       | 70      | 58      |
| k_Bacteria | p_Firmicutes     | c_Clostridia          | o_Clostridiales | Unclassified      | Unclassified     | Unclassified | 0        | 0        | 0        | 2        | 12       | 0        | 0        | 0        | 606      | 0        | 0   | 67       | 0        | 78       | 0        | 0       | 0       | 1       | 3       |
| k_Bacteria | p_Firmicutes     | c_Clostridia          | o_Clostridiales | f_Lachnospiraceae | Unclassified     | Unclassified | 0        | 0        | 0        | 4        | 0        | 0        | 3        | 1        | 0        | 0        | 0   | 1        | 0        | 0        | 0        | 0       | 1       | 3       | 0       |
| k_Bacteria | p_Firmicutes     | c_Clostridia          | o_Clostridiales | Unclassified      | Unclassified     | Unclassified | 0        | 0        | 0        | 3        | 0        | 0        | 20       | 0        | 0        | 0        | 1   | 0        | 0        | 0        | 1        | 0       | 0       | 0       | 0       |
| k_Bacteria | p_Proteobacteria | c_Alphaproteobacteria | o_RF32          | Unclassified      | Unclassified     | Unclassified | 0        | 0        | 0        | 10       | 0        | 0        | 0        | 0        | 0        | 0        | 0   | 0        | 0        | 0        | 0        | 0       | 0       | 0       | 0       |
| k_Bacteria | p_Tenericutes    | c_Mollicutes          | o_RF39          | Unclassified      | Unclassified     | Unclassified | 0        | 0        | 0        | 2        | 0        | 0        | 0        | 0        | 0        | 0        | 2   | 7        | 0        | 0        | 1        | 1       | 2       | 1       | 0       |

| Level_1    | Level_2         | Level_3       | Level_4         | Level_5              | Level_6           | Level_7      | ss1<br>0 | sn<br>15 | sn<br>16 | ss<br>19 | sn<br>20 | ss<br>21 | ss<br>25 | sn<br>26 | sn<br>27 | ss2<br>8 | ss2 | ss<br>30 | sn<br>31 | sn<br>35 | sn<br>36 | sn<br>5 | ss<br>6 | ss<br>8 | sn<br>9 |
|------------|-----------------|---------------|-----------------|----------------------|-------------------|--------------|----------|----------|----------|----------|----------|----------|----------|----------|----------|----------|-----|----------|----------|----------|----------|---------|---------|---------|---------|
| k_Bacteria | p_Firmicutes    | c_Clostridia  | o_Clostridiales | Unclassified         | Unclassified      | Unclassified | 0        | 0        | 0        | 5        | 0        | 0        | 0        | 0        | 0        | 0        | 0   | 0        | 25       | 0        | 0        | 0       | 0       | 7       | 0       |
| k_Bacteria | p_Firmicutes    | c_Clostridia  | o_Clostridiales | f_Dehalobacteriaceae | g_Dehalobacterium | Unclassified | 0        | 0        | 0        | 2        | 0        | 0        | 0        | 0        | 0        | 0        | 1   | 0        | 0        | 0        | 0        | 0       | 1       | 0       | 0       |
| k_Bacteria | p_Firmicutes    | c_Clostridia  | o_Clostridiales | Unclassified         | Unclassified      | Unclassified | 0        | 0        | 0        | 20       | 0        | 12       | 0        | 5        | 0        | 0        | 0   | 791      | 20       | 1        | 0        | 3       | 254     | 2       | 1       |
| k_Bacteria | p_Bacteroidetes | c_Bacteroidia | o_Bacteroidales | f_Prevotellaceae     | g_Prevotella      | Unclassified | 0        | 0        | 0        | 1        | 3        | 3        | 3        | 0        | 2        | 0        | 0   | 2        | 1        | 3        | 0        | 0       | 0       | 0       | 1       |
| k_Bacteria | p_Firmicutes    | c_Clostridia  | o_Clostridiales | f_Lachnospiraceae    | Unclassified      | Unclassified | 0        | 0        | 0        | 1        | 0        | 0        | 0        | 0        | 1        | 3        | 1   | 45       | 0        | 6        | 0        | 0       | 0       | 0       | 0       |
| k_Bacteria | p_Bacteroidetes | c_Bacteroidia | o_Bacteroidales | Unclassified         | Unclassified      | Unclassified | 0        | 0        | 0        | 8        | 1        | 35       | 0        | 0        | 0        | 0        | 0   | 0        | 25       | 2        | 0        | 0       | 3       | 8       | 0       |
| k_Bacteria | p_Firmicutes    | c_Clostridia  | o_Clostridiales | f_Lachnospiraceae    | Unclassified      | Unclassified | 0        | 0        | 0        | 3        | 0        | 0        | 0        | 0        | 0        | 0        | 0   | 1        | 3        | 0        | 0        | 3       | 0       | 9       | 1       |
| k_Bacteria | p_Firmicutes    | c_Clostridia  | o_Clostridiales | f_Lachnospiraceae    | Unclassified      | Unclassified | 0        | 0        | 0        | 1        | 0        | 0        | 0        | 2        | 0        | 0        | 0   | 0        | 0        | 0        | 0        | 0       | 0       | 0       | 0       |
| k_Bacteria | p_Firmicutes    | c_Clostridia  | o_Clostridiales | f_Lachnospiraceae    | Unclassified      | Unclassified | 0        | 0        | 0        | 6        | 0        | 0        | 0        | 0        | 0        | 0        | 0   | 2        | 3        | 0        | 0        | 2       | 3       | 5       | 2       |
| k_Bacteria | p_Firmicutes    | c_Clostridia  | o_Clostridiales | Unclassified         | Unclassified      | Unclassified | 0        | 0        | 0        | 2        | 0        | 0        | 0        | 7        | 0        | 0        | 1   | 0        | 0        | 0        | 0        | 0       | 0       | 7       | 0       |
| k_Bacteria | p_Bacteroidetes | c_Bacteroidia | o_Bacteroidales | f_S24-7              | Unclassified      | Unclassified | 0        | 0        | 0        | 1        | 0        | 1        | 0        | 0        | 0        | 0        | 0   | 3        | 0        | 0        | 0        | 0       | 1       | 0       | 0       |
| k_Bacteria | p_Firmicutes    | c_Clostridia  | o_Clostridiales | f_Lachnospiraceae    | Unclassified      | Unclassified | 0        | 0        | 0        | 2        | 2        | 0        | 6        | 4        | 0        | 0        | 0   | 3        | 0        | 0        | 1        | 0       | 0       | 0       | 0       |
| k_Bacteria | Unclassified    | Unclassified  | Unclassified    | Unclassified         | Unclassified      | Unclassified | 0        | 0        | 0        | 2        | 0        | 0        | 0        | 0        | 0        | 0        | 0   | 1        | 0        | 1        | 0        | 0       | 0       | 0       | 0       |
| k_Bacteria | p_Firmicutes    | c_Clostridia  | o_Clostridiales | f_Ruminococcaceae    | Unclassified      | Unclassified | 0        | 0        | 0        | 6        | 0        | 0        | 0        | 0        | 0        | 0        | 0   | 0        | 0        | 0        | 0        | 0       | 0       | 1       | 0       |

| Level_1    | Level_2         | Level_3       | Level_4         | Level_5              | Level_6        | Level_7      | ss10 | sn15 | sn16 | ss19 | sn20 | ss21 | ss25 | sn26 | sn27 | ss28 | ss2 | ss30 | sn31 | sn35 | sn36 | sn5 | ss6 | ss8 | sn9 |
|------------|-----------------|---------------|-----------------|----------------------|----------------|--------------|------|------|------|------|------|------|------|------|------|------|-----|------|------|------|------|-----|-----|-----|-----|
| k_Bacteria | p_Firmicutes    | c_Clostridia  | o_Clostridiales | f_Ruminococaceae     | g_Oscillospira | Unclassified | 0    | 0    | 0    | 5    | 0    | 0    | 5    | 0    | 0    | 0    | 0   | 0    | 0    | 0    | 0    | 0   | 0   | 0   | 0   |
| k_Bacteria | p_Firmicutes    | c_Clostridia  | o_Clostridiales | Unclassified         | Unclassified   | Unclassified | 0    | 0    | 0    | 5    | 0    | 0    | 46   | 0    | 0    | 0    | 2   | 0    | 12   | 0    | 0    | 0   | 3   | 17  | 82  |
| k_Bacteria | Unclassified    | Unclassified  | Unclassified    | Unclassified         | Unclassified   | Unclassified | 0    | 0    | 0    | 1    | 0    | 0    | 0    | 0    | 2    | 0    | 0   | 2    | 0    | 2    | 4    | 0   | 0   | 1   | 0   |
| k_Bacteria | p_Firmicutes    | Unclassified  | Unclassified    | Unclassified         | Unclassified   | Unclassified | 0    | 0    | 0    | 4    | 0    | 0    | 0    | 1    | 1    | 1    | 2   | 5    | 0    | 0    | 1    | 1   | 1   | 1   | 1   |
| k_Bacteria | p_Firmicutes    | c_Clostridia  | o_Clostridiales | f_Ruminococaceae     | Unclassified   | Unclassified | 0    | 0    | 0    | 3    | 0    | 0    | 0    | 0    | 0    | 0    | 0   | 0    | 0    | 0    | 0    | 0   | 0   | 0   | 0   |
| k_Bacteria | p_Firmicutes    | c_Clostridia  | o_Clostridiales | f_Lachnospiraceae    | Unclassified   | Unclassified | 0    | 0    | 0    | 1    | 0    | 0    | 0    | 0    | 1    | 0    | 0   | 11   | 0    | 0    | 0    | 0   | 1   | 3   | 0   |
| k_Bacteria | p_Bacteroidetes | c_Bacteroidia | o_Bacteroidales | f_Prevotellaceae     | g_Prevotella   | s_copri      | 0    | 0    | 0    | 1    | 1    | 0    | 0    | 4    | 0    | 0    | 0   | 0    | 0    | 0    | 0    | 0   | 0   | 0   | 0   |
| k_Bacteria | p_Firmicutes    | c_Clostridia  | o_Clostridiales | f_[Mogibacteriaceae] | Unclassified   | Unclassified | 0    | 0    | 0    | 2    | 1    | 0    | 0    | 0    | 0    | 0    | 0   | 0    | 0    | 1    | 0    | 0   | 1   | 0   | 0   |
| k_Bacteria | Unclassified    | Unclassified  | Unclassified    | Unclassified         | Unclassified   | Unclassified | 0    | 0    | 0    | 1    | 0    | 0    | 0    | 0    | 1    | 0    | 0   | 0    | 0    | 0    | 0    | 0   | 0   | 0   | 0   |
| k_Bacteria | p_Firmicutes    | c_Clostridia  | o_Clostridiales | f_Ruminococaceae     | Unclassified   | Unclassified | 0    | 0    | 0    | 2    | 1    | 0    | 2    | 4    | 0    | 2    | 1   | 0    | 0    | 2    | 1    | 0   | 0   | 0   | 0   |
| k_Bacteria | p_Firmicutes    | c_Clostridia  | o_Clostridiales | f_Lachnospiraceae    | Unclassified   | Unclassified | 0    | 0    | 0    | 1    | 0    | 0    | 0    | 3    | 0    | 0    | 0   | 66   | 0    | 0    | 0    | 8   | 1   | 0   | 0   |
| k_Bacteria | p_Firmicutes    | c_Clostridia  | o_Clostridiales | f_Ruminococaceae     | Unclassified   | Unclassified | 0    | 0    | 0    | 2    | 0    | 1    | 1    | 0    | 0    | 0    | 0   | 3    | 0    | 1    | 0    | 1   | 1   | 1   | 0   |
| k_Bacteria | p_Tenericutes   | c_Mollicutes  | o_RF39          | Unclassified         | Unclassified   | Unclassified | 0    | 0    | 0    | 3    | 0    | 0    | 1    | 2    | 0    | 0    | 3   | 0    | 0    | 0    | 0    | 0   | 0   | 0   | 0   |
| k_Bacteria | p_Firmicutes    | c_Clostridia  | o_Clostridiales | Unclassified         | Unclassified   | Unclassified | 0    | 0    | 0    | 1    | 0    | 0    | 2    | 0    | 0    | 1    | 0   | 0    | 0    | 0    | 0    | 0   | 0   | 0   | 0   |



| Level_1    | Level_2          | Level_3                 | Level_4              | Level_5               | Level_6          | Level_7      | ss1 | sn | sn | ss | sn | ss | sn | ss | sn | ss2 | ss2 | ss | sn | sn | sn | ss | ss | sn |    |
|------------|------------------|-------------------------|----------------------|-----------------------|------------------|--------------|-----|----|----|----|----|----|----|----|----|-----|-----|----|----|----|----|----|----|----|----|
| k_Bacteria | p_Firmicutes     | c_Clostridia            | o_Clostridiales      | Unclassified          | Unclassified     | Unclassified | 0   | 0  | 0  | 3  | 0  | 0  | 0  | 2  | 0  | 0   | 0   | 1  | 0  | 0  | 0  | 0  | 0  | 0  |    |
| k_Bacteria | p_Firmicutes     | c_Clostridia            | o_Clostridiales      | f_Lachnospiraceae     | Unclassified     | Unclassified | 0   | 0  | 0  | 2  | 9  | 0  | 2  | 0  | 0  | 0   | 0   | 2  | 0  | 0  | 0  | 0  | 0  | 0  |    |
| k_Bacteria | p_Firmicutes     | c_Clostridia            | o_Clostridiales      | Unclassified          | Unclassified     | Unclassified | 0   | 0  | 0  | 1  | 0  | 0  | 0  | 0  | 4  | 0   | 0   | 1  | 0  | 3  | 0  | 6  | 0  | 1  |    |
| k_Bacteria | p_Bacteroidetes  | c_Bacteroidia           | o_Bacteroidales      | f_Prevotellaceae      | g_Prevotellaceae | s_copri      | 0   | 0  | 0  | 1  | 2  | 0  | 6  | 5  | 0  | 0   | 2   | 0  | 4  | 1  | 0  | 2  | 0  | 1  |    |
| k_Bacteria | p_Firmicutes     | c_Clostridia            | o_Clostridiales      | Unclassified          | Unclassified     | Unclassified | 0   | 0  | 0  | 2  | 0  | 67 | 0  | 0  | 0  | 0   | 0   | 60 | 13 | 0  | 0  | 0  | 0  | 21 | 11 |
| k_Bacteria | p_Firmicutes     | c_Clostridia            | o_Clostridiales      | f_Lachnospiraceae     | g_Coproccoccus   | s_catus      | 0   | 0  | 0  | 1  | 0  | 5  | 0  | 0  | 0  | 0   | 0   | 0  | 0  | 0  | 0  | 0  | 0  | 0  |    |
| k_Bacteria | p_Proteobacteria | c_Epsilonproteobacteria | o_Campylobacteriales | f_Helicobacteraceae   | g_Flexispiraceae | Unclassified | 0   | 0  | 0  | 1  | 0  | 0  | 0  | 1  | 0  | 0   | 0   | 2  | 0  | 6  | 1  | 0  | 2  | 0  |    |
| k_Bacteria | p_Firmicutes     | c_Clostridia            | o_Clostridiales      | f_Ruminococcaceae     | g_Ruminococcus   | Unclassified | 0   | 0  | 0  | 1  | 0  | 0  | 0  | 0  | 0  | 0   | 0   | 0  | 0  | 0  | 0  | 0  | 1  | 1  |    |
| k_Bacteria | p_Firmicutes     | c_Clostridia            | o_Clostridiales      | f_Lachnospiraceae     | Unclassified     | Unclassified | 0   | 0  | 0  | 2  | 0  | 0  | 0  | 0  | 0  | 0   | 0   | 2  | 0  | 0  | 0  | 0  | 0  | 0  |    |
| k_Bacteria | p_Firmicutes     | c_Clostridia            | o_Clostridiales      | f_Ruminococcaceae     | Unclassified     | Unclassified | 0   | 0  | 0  | 4  | 0  | 0  | 0  | 0  | 0  | 0   | 0   | 0  | 0  | 0  | 0  | 2  | 0  | 0  |    |
| k_Bacteria | p_Firmicutes     | c_Clostridia            | o_Clostridiales      | Unclassified          | Unclassified     | Unclassified | 0   | 0  | 0  | 2  | 0  | 0  | 0  | 0  | 0  | 0   | 0   | 0  | 0  | 0  | 0  | 0  | 0  | 5  |    |
| k_Bacteria | p_Firmicutes     | c_Clostridia            | o_Clostridiales      | f_Ruminococcaceae     | Unclassified     | Unclassified | 0   | 0  | 0  | 1  | 0  | 0  | 0  | 1  | 0  | 0   | 0   | 0  | 0  | 0  | 0  | 0  | 0  | 0  |    |
| k_Bacteria | p_Proteobacteria | c_Deltaproteobacteria   | o_Desulfobacteriales | f_Desulfobacteriaceae | Unclassified     | Unclassified | 0   | 0  | 0  | 1  | 0  | 0  | 1  | 0  | 0  | 0   | 0   | 0  | 0  | 0  | 0  | 0  | 2  | 0  |    |
| k_Bacteria | p_Actinobacteria | c_Coriobacteriia        | o_Coriobacteriales   | f_Coriobacteriaceae   | g_Adlercreutzia  | Unclassified | 0   | 0  | 0  | 1  | 0  | 0  | 0  | 0  | 0  | 1   | 1   | 0  | 0  | 0  | 0  | 0  | 0  | 0  |    |

| Level_1    | Level_2          | Level_3              | Level_4           | Level_5                | Level_6         | Level_7        | ss10 | sn15 | sn16 | ss19 | sn20 | ss21 | ss25 | sn26 | sn27 | ss28 | ss2 | ss30 | sn31 | sn35 | sn36 | sn5 | ss6 | ss8 | sn9 |   |
|------------|------------------|----------------------|-------------------|------------------------|-----------------|----------------|------|------|------|------|------|------|------|------|------|------|-----|------|------|------|------|-----|-----|-----|-----|---|
| k_Bacteria | p_Bacteroidetes  | c_Bacteroidia        | o_Bacteroidales   | f_Rikenellaceae        | Unclassified    | Unclassified   | 0    | 0    | 0    | 1    | 1    | 0    | 0    | 0    | 0    | 0    | 0   | 0    | 0    | 0    | 0    | 0   | 0   | 0   | 0   | 4 |
| k_Bacteria | p_Bacteroidetes  | c_Bacteroidia        | o_Bacteroidales   | f_Prevotellaceae       | g_Prevotellae   | Unclassified   | 0    | 0    | 0    | 1    | 1    | 2    | 4    | 1    | 3    | 0    | 0   | 0    | 0    | 2    | 1    | 4   | 2   | 3   | 1   |   |
| k_Bacteria | Unclassified     | Unclassified         | Unclassified      | Unclassified           | Unclassified    | Unclassified   | 0    | 0    | 0    | 1    | 0    | 0    | 0    | 0    | 0    | 0    | 0   | 0    | 0    | 0    | 0    | 0   | 0   | 0   | 2   |   |
| k_Bacteria | p_Firmicutes     | Unclassified         | Unclassified      | Unclassified           | Unclassified    | Unclassified   | 0    | 0    | 0    | 1    | 0    | 0    | 0    | 0    | 0    | 0    | 0   | 0    | 0    | 4    | 1    | 0   | 1   | 0   | 1   |   |
| k_Bacteria | p_Bacteroidetes  | c_Bacteroidia        | o_Bacteroidales   | f_Rikenellaceae        | Unclassified    | Unclassified   | 0    | 0    | 0    | 1    | 0    | 0    | 0    | 17   | 6    | 0    | 0   | 0    | 0    | 0    | 0    | 0   | 0   | 1   | 2   | 4 |
| k_Bacteria | p_Spirochaetes   | c_Spirochaetes       | o_Spirochaetales  | f_Spirochaetales       | g_Treponema     | Unclassified   | 0    | 0    | 0    | 1    | 2    | 1    | 2    | 28   | 0    | 7    | 2   | 4    | 0    | 7    | 3    | 2   | 1   | 1   | 1   |   |
| k_Bacteria | p_Firmicutes     | c_Clostridia         | o_Clostridiales   | f_Ruminococcaceae      | g_Oscillospira  | Unclassified   | 0    | 0    | 0    | 2    | 3    | 1    | 2    | 0    | 0    | 0    | 0   | 1    | 0    | 2    | 0    | 0   | 0   | 0   | 4   |   |
| k_Bacteria | p_Firmicutes     | c_Clostridia         | o_Clostridiales   | f_Lachnospiraceae      | Unclassified    | Unclassified   | 0    | 0    | 0    | 1    | 0    | 0    | 0    | 0    | 0    | 0    | 0   | 0    | 0    | 0    | 5    | 0   | 0   | 1   | 0   |   |
| k_Bacteria | p_Tenericutes    | c_Mollicutes         | o_RF39            | Unclassified           | Unclassified    | Unclassified   | 0    | 0    | 0    | 1    | 0    | 0    | 0    | 0    | 0    | 0    | 0   | 0    | 0    | 0    | 29   | 4   | 10  | 2   | 24  |   |
| k_Bacteria | p_Proteobacteria | c_Betaproteobacteria | o_Burkholderiales | f_Alcaligenaceae       | g_Sutterella    | Unclassified   | 0    | 0    | 0    | 1    | 1    | 0    | 0    | 0    | 0    | 0    | 0   | 1    | 0    | 0    | 0    | 0   | 0   | 0   | 3   |   |
| k_Bacteria | p_Firmicutes     | c_Clostridia         | o_Clostridiales   | f_Ruminococcaceae      | g_Ruminococcus  | Unclassified   | 0    | 0    | 0    | 0    | 63   | 26   | 0    | 0    | 4    | 63   | 5   | 0    | 0    | 7    | 4    | 36  | 0   | 0   | 36  | 0 |
| k_Bacteria | p_Bacteroidetes  | c_Bacteroidia        | o_Bacteroidales   | f_[Paraprevotellaceae] | g_[Prevotellae] | Unclassified   | 0    | 0    | 0    | 0    | 56   | 13   | 1    | 74   | 12   | 18   | 14  | 64   | 57   | 37   | 68   | 5   | 27  | 15  | 0   |   |
| k_Bacteria | p_Bacteroidetes  | c_Bacteroidia        | o_Bacteroidales   | f_S24-7                | Unclassified    | Unclassified   | 0    | 0    | 0    | 0    | 29   | 0    | 6    | 17   | 1    | 0    | 0   | 1    | 8    | 0    | 37   | 0   | 0   | 16  | 25  |   |
| k_Bacteria | p_Firmicutes     | c_Clostridia         | o_Clostridiales   | f_Ruminococcaceae      | g_Butyricoccus  | s_pullicaeorum | 0    | 0    | 0    | 0    | 20   | 0    | 0    | 0    | 0    | 0    | 0   | 0    | 0    | 0    | 0    | 0   | 0   | 4   | 9   |   |

| Level_1    | Level_2          | Level_3               | Level_4              | Level_5               | Level_6         | Level_7         | ss10 | sn15 | sn16 | ss19 | sn20 | ss21 | ss25 | sn26 | sn27 | ss28 | ss2 | ss30 | sn31 | sn35 | sn36 | sn5 | ss6 | ss8 | sn9 |
|------------|------------------|-----------------------|----------------------|-----------------------|-----------------|-----------------|------|------|------|------|------|------|------|------|------|------|-----|------|------|------|------|-----|-----|-----|-----|
| k_Bacteria | p_Bacteroidetes  | c_Bacteroidia         | o_Bacteroidales      | f_S24-7               | Unclassified    | Unclassified    | 0    | 0    | 0    | 0    | 8    | 63   | 35   | 51   | 3    | 1    | 0   | 4    | 12   | 0    | 43   | 0   | 43  | 19  | 15  |
| k_Bacteria | p_Firmicutes     | c_Erysipelotrichi     | o_Erysipelotrichales | f_Erysipelotrichaceae | g_[Eubacterium] | s_cylin-droides | 0    | 0    | 0    | 0    | 10   | 0    | 0    | 0    | 0    | 0    | 0   | 0    | 0    | 0    | 0    | 0   | 0   | 0   | 0   |
| k_Bacteria | p_Teneri-cutes   | c_Mollicutes          | o_RF39               | Unclassified          | Unclassified    | Unclassified    | 0    | 0    | 0    | 0    | 7    | 0    | 1    | 0    | 0    | 0    | 0   | 0    | 3    | 0    | 4    | 0   | 2   | 0   | 11  |
| k_Bacteria | p_Proteobacteria | c_Alphaproteobacteria | o_RF32               | Unclassified          | Unclassified    | Unclassified    | 0    | 0    | 0    | 0    | 2    | 0    | 0    | 0    | 0    | 0    | 0   | 0    | 0    | 0    | 0    | 0   | 0   | 0   | 0   |
| k_Bacteria | p_Bacteroidetes  | c_Bacteroidia         | o_Bacteroidales      | f_S24-7               | Unclassified    | Unclassified    | 0    | 0    | 0    | 0    | 6    | 0    | 4    | 7    | 0    | 0    | 2   | 0    | 0    | 0    | 0    | 0   | 0   | 0   | 27  |
| k_Bacteria | p_Proteobacteria | Unclassified          | Unclassified         | Unclassified          | Unclassified    | Unclassified    | 0    | 0    | 0    | 0    | 2    | 12   | 0    | 1    | 0    | 0    | 0   | 28   | 2    | 8    | 0    | 1   | 0   | 2   | 0   |
| k_Bacteria | p_Teneri-cutes   | c_Mollicutes          | o_RF39               | Unclassified          | Unclassified    | Unclassified    | 0    | 0    | 0    | 0    | 3    | 0    | 0    | 0    | 0    | 0    | 0   | 0    | 0    | 0    | 0    | 0   | 0   | 0   | 0   |
| k_Bacteria | p_Firmicutes     | c_Clostridia          | o_Clostridiales      | Unclassified          | Unclassified    | Unclassified    | 0    | 0    | 0    | 0    | 1    | 2    | 1    | 0    | 1    | 2    | 0   | 3    | 0    | 0    | 0    | 0   | 0   | 0   | 0   |
| k_Archaea  | p_Euryarchaeota  | c_Methanobacteria     | o_Methanobacteriales | f_Methanobacteriaceae | g_Methanospaera | Unclassified    | 0    | 0    | 0    | 0    | 2    | 0    | 2    | 2    | 0    | 2    | 0   | 0    | 0    | 2    | 0    | 0   | 0   | 0   | 0   |
| k_Bacteria | p_Proteobacteria | c_Alphaproteobacteria | o_RF32               | Unclassified          | Unclassified    | Unclassified    | 0    | 0    | 0    | 0    | 1    | 0    | 0    | 0    | 0    | 0    | 5   | 0    | 0    | 0    | 0    | 0   | 12  | 0   | 0   |
| k_Bacteria | p_Bacteroidetes  | c_Bacteroidia         | o_Bacteroidales      | f_S24-7               | Unclassified    | Unclassified    | 0    | 0    | 0    | 0    | 2    | 0    | 0    | 10   | 0    | 2    | 12  | 0    | 0    | 0    | 0    | 0   | 0   | 0   | 0   |
| k_Bacteria | p_Bacteroidetes  | c_Bacteroidia         | o_Bacteroidales      | f_Bacteroidaceae      | g_Bacteroides   | Unclassified    | 0    | 0    | 0    | 0    | 2    | 0    | 3    | 2    | 1    | 1    | 0   | 2    | 0    | 19   | 2    | 0   | 4   | 3   | 1   |
| k_Bacteria | p_Firmicutes     | c_Clostridia          | o_Clostridiales      | f_Ruminococcaceae     | Unclassified    | Unclassified    | 0    | 0    | 0    | 0    | 3    | 1    | 0    | 0    | 0    | 0    | 0   | 1    | 2    | 0    | 0    | 0   | 0   | 6   | 3   |
| k_Bacteria | Unclassified     | Unclassified          | Unclassified         | Unclassified          | Unclassified    | Unclassified    | 0    | 0    | 0    | 0    | 2    | 2    | 0    | 0    | 2    | 0    | 2   | 0    | 0    | 5    | 1    | 1   | 3   | 4   | 0   |

| Level_1    | Level_2         | Level_3           | Level_4         | Level_5           | Level_6            | Level_7      | ss10 | sn15 | sn16 | ss19 | sn20 | ss21 | ss25 | sn26 | sn27 | ss28 | ss2 | ss30 | sn31 | sn35 | sn36 | sn5 | ss6 | ss8 | sn9 |   |
|------------|-----------------|-------------------|-----------------|-------------------|--------------------|--------------|------|------|------|------|------|------|------|------|------|------|-----|------|------|------|------|-----|-----|-----|-----|---|
| k_Bacteria | p_Firmicutes    | c_Clostridia      | o_Clostridiales | f_Ruminococaceae  | g_Faecalibacterium | Unclassified | 0    | 0    | 0    | 0    | 3    | 0    | 2    | 0    | 0    | 4    | 0   | 0    | 0    | 0    | 0    | 0   | 0   | 0   | 0   | 0 |
| k_Bacteria | p_Firmicutes    | c_Clostridia      | o_Clostridiales | Unclassified      | Unclassified       | Unclassified | 0    | 0    | 0    | 0    | 1    | 0    | 0    | 0    | 1    | 0    | 0   | 0    | 0    | 1    | 1    | 0   | 0   | 1   | 0   |   |
| k_Bacteria | p_Firmicutes    | c_Clostridia      | o_Clostridiales | f_Ruminococaceae  | Unclassified       | Unclassified | 0    | 0    | 0    | 0    | 2    | 1    | 0    | 0    | 2    | 3    | 1   | 2    | 1    | 6    | 2    | 3   | 3   | 2   | 1   |   |
| k_Bacteria | p_Bacteroidetes | c_Bacteroidia     | o_Bacteroidales | Unclassified      | Unclassified       | Unclassified | 0    | 0    | 0    | 0    | 1    | 2    | 0    | 0    | 0    | 0    | 1   | 0    | 0    | 0    | 0    | 1   | 0   | 0   | 3   |   |
| k_Bacteria | p_Firmicutes    | c_Clostridia      | o_Clostridiales | f_Lachnospiraceae | Unclassified       | Unclassified | 0    | 0    | 0    | 0    | 2    | 1    | 0    | 1    | 5    | 0    | 0   | 0    | 0    | 11   | 3    | 8   | 0   | 0   | 0   |   |
| k_Bacteria | p_Firmicutes    | c_Clostridia      | o_Clostridiales | f_Lachnospiraceae | Unclassified       | Unclassified | 0    | 0    | 0    | 0    | 1    | 5    | 9    | 0    | 0    | 0    | 0   | 0    | 0    | 0    | 2    | 0   | 0   | 0   | 0   |   |
| k_Bacteria | Unclassified    | Unclassified      | Unclassified    | Unclassified      | Unclassified       | Unclassified | 0    | 0    | 0    | 0    | 1    | 0    | 2    | 0    | 0    | 0    | 0   | 0    | 0    | 0    | 0    | 0   | 0   | 6   | 0   |   |
| k_Bacteria | p_Lentisphaerae | c_[Lentisphaeria] | o_Victivallales | f_Victivallaceae  | g_Victivallis      | s_vadensis   | 0    | 0    | 0    | 0    | 1    | 0    | 0    | 0    | 0    | 0    | 0   | 5    | 0    | 0    | 0    | 1   | 1   | 3   | 0   |   |
| k_Bacteria | Unclassified    | Unclassified      | Unclassified    | Unclassified      | Unclassified       | Unclassified | 0    | 0    | 0    | 0    | 1    | 0    | 0    | 0    | 0    | 3    | 0   | 0    | 0    | 0    | 0    | 0   | 0   | 0   | 0   |   |
| k_Bacteria | Unclassified    | Unclassified      | Unclassified    | Unclassified      | Unclassified       | Unclassified | 0    | 0    | 0    | 0    | 2    | 2    | 0    | 0    | 1    | 0    | 0   | 13   | 0    | 0    | 0    | 2   | 2   | 2   | 5   |   |
| k_Bacteria | Unclassified    | Unclassified      | Unclassified    | Unclassified      | Unclassified       | Unclassified | 0    | 0    | 0    | 0    | 1    | 0    | 0    | 0    | 0    | 0    | 0   | 0    | 0    | 0    | 0    | 0   | 0   | 3   | 1   |   |
| k_Bacteria | p_Firmicutes    | c_Clostridia      | o_Clostridiales | f_Ruminococaceae  | g_Ruminococcus     | Unclassified | 0    | 0    | 0    | 0    | 2    | 3    | 2    | 2    | 2    | 1    | 3   | 4    | 0    | 1    | 1    | 1   | 0   | 0   | 0   |   |
| k_Bacteria | Unclassified    | Unclassified      | Unclassified    | Unclassified      | Unclassified       | Unclassified | 0    | 0    | 0    | 0    | 3    | 0    | 2    | 0    | 0    | 0    | 0   | 0    | 0    | 0    | 0    | 0   | 0   | 1   | 0   |   |
| k_Bacteria | p_Firmicutes    | c_Clostridia      | o_Clostridiales | f_Lachnospiraceae | Unclassified       | Unclassified | 0    | 0    | 0    | 0    | 1    | 1    | 0    | 1    | 2    | 1    | 0   | 7    | 0    | 1    | 0    | 1   | 0   | 5   | 4   |   |

| Level_1    | Level_2          | Level_3          | Level_4            | Level_5                | Level_6         | Level_7      | ss1<br>0 | sn<br>15 | sn<br>16 | ss<br>19 | sn<br>20 | ss<br>21 | ss<br>25 | sn<br>26 | sn<br>27 | ss2<br>8 | ss2 | ss<br>30 | sn<br>31 | sn<br>35 | sn<br>36 | sn<br>5 | ss<br>6 | ss<br>8 | sn<br>9 |
|------------|------------------|------------------|--------------------|------------------------|-----------------|--------------|----------|----------|----------|----------|----------|----------|----------|----------|----------|----------|-----|----------|----------|----------|----------|---------|---------|---------|---------|
| k_Bacteria | p_Firmicutes     | c_Bacilli        | o_Lactobacillales  | f_Aerococcales         | g_Facklamia     | Unclassified | 0        | 0        | 0        | 0        | 1        | 0        | 0        | 0        | 0        | 1        | 0   | 0        | 1        | 0        | 0        | 1       | 0       | 0       | 1       |
| k_Bacteria | p_Bacteroidetes  | c_Bacteroidia    | o_Bacteroidales    | f_Prevotellaceae       | g_Prevotella    | Unclassified | 0        | 0        | 0        | 0        | 1        | 1        | 0        | 1        | 0        | 2        | 0   | 0        | 1        | 1        | 1        | 1       | 0       | 1       | 1       |
| k_Bacteria | p_Firmicutes     | c_Clostridia     | o_Clostridiales    | f_Christensenellaceae  | Unclassified    | Unclassified | 0        | 0        | 0        | 0        | 1        | 0        | 0        | 0        | 0        | 0        | 0   | 0        | 0        | 0        | 2        | 0       | 1       | 1       | 0       |
| k_Bacteria | p_Firmicutes     | c_Bacilli        | o_Lactobacillales  | f_Aerococcales         | Unclassified    | Unclassified | 0        | 0        | 0        | 0        | 1        | 0        | 0        | 0        | 0        | 0        | 0   | 0        | 0        | 0        | 0        | 0       | 0       | 0       | 1       |
| k_Bacteria | p_Firmicutes     | c_Clostridia     | o_Clostridiales    | Unclassified           | Unclassified    | Unclassified | 0        | 0        | 0        | 0        | 2        | 0        | 0        | 0        | 0        | 0        | 0   | 42       | 0        | 0        | 1        | 0       | 0       | 1       | 0       |
| k_Bacteria | p_Bacteroidetes  | c_Bacteroidia    | o_Bacteroidales    | f_[Paraprevotellaceae] | g_[Prevotella]  | Unclassified | 0        | 0        | 0        | 0        | 1        | 0        | 0        | 0        | 0        | 0        | 0   | 1        | 0        | 0        | 0        | 0       | 0       | 1       | 0       |
| k_Bacteria | p_Firmicutes     | c_Clostridia     | o_Clostridiales    | f_Veillonellaceae      | Unclassified    | Unclassified | 0        | 0        | 0        | 0        | 1        | 0        | 0        | 0        | 0        | 0        | 0   | 0        | 0        | 4        | 0        | 0       | 0       | 0       | 0       |
| k_Bacteria | p_Actinobacteria | c_Coriobacteriia | o_Coriobacteriales | f_Coriobacteriaceae    | g_Adlercreutzia | Unclassified | 0        | 0        | 0        | 0        | 1        | 0        | 0        | 1        | 0        | 0        | 0   | 1        | 0        | 0        | 0        | 0       | 0       | 0       | 0       |
| k_Bacteria | p_Bacteroidetes  | c_Bacteroidia    | o_Bacteroidales    | Unclassified           | Unclassified    | Unclassified | 0        | 0        | 0        | 0        | 0        | 72       | 0        | 0        | 4        | 0        | 0   | 123      | 24       | 0        | 0        | 0       | 0       | 0       | 0       |
| k_Bacteria | p_Firmicutes     | c_Clostridia     | o_Clostridiales    | f_Lachnospiraceae      | g_Coproccus     | Unclassified | 0        | 0        | 0        | 0        | 0        | 11       | 0        | 0        | 0        | 0        | 0   | 0        | 0        | 0        | 0        | 0       | 0       | 0       | 0       |
| k_Bacteria | p_Spirochaetes   | c_Spirochaetes   | o_Spirochaetales   | f_Spirochaetales       | g_Treponema     | Unclassified | 0        | 0        | 0        | 0        | 0        | 170      | 0        | 0        | 183      | 0        | 152 | 114      | 57       | 0        | 0        | 185     | 0       | 1       | 0       |
| k_Bacteria | p_Firmicutes     | c_Clostridia     | o_Clostridiales    | f_Lachnospiraceae      | g_Coproccus     | s_eutactus   | 0        | 0        | 0        | 0        | 0        | 138      | 0        | 0        | 0        | 0        | 0   | 0        | 0        | 0        | 0        | 0       | 0       | 0       | 0       |
| k_Bacteria | p_Bacteroidetes  | c_Bacteroidia    | o_Bacteroidales    | f_Prevotellaceae       | Unclassified    | Unclassified | 0        | 0        | 0        | 0        | 0        | 58       | 0        | 0        | 0        | 0        | 0   | 0        | 3        | 0        | 0        | 338     | 0       | 933     | 858     |
| k_Bacteria | p_Bacteroidetes  | Unclassified     | Unclassified       | Unclassified           | Unclassified    | Unclassified | 0        | 0        | 0        | 0        | 0        | 21       | 0        | 0        | 267      | 0        | 0   | 6        | 81       | 0        | 0        | 0       | 0       | 0       | 0       |

| Level_1    | Level_2          | Level_3               | Level_4            | Level_5             | Level_6          | Level_7      | ss1<br>0 | sn<br>15 | sn<br>16 | ss<br>19 | sn<br>20 | ss<br>21 | ss<br>25 | sn<br>26 | sn<br>27 | ss2<br>8 | ss2 | ss<br>30 | sn<br>31 | sn<br>35 | sn<br>36 | sn<br>5 | ss<br>6 | ss<br>8 | sn<br>9 |
|------------|------------------|-----------------------|--------------------|---------------------|------------------|--------------|----------|----------|----------|----------|----------|----------|----------|----------|----------|----------|-----|----------|----------|----------|----------|---------|---------|---------|---------|
| k_Bacteria | p_Firmicutes     | c_Clostridia          | o_Clostridiales    | f_Lachnospiraceae   | Unclassified     | Unclassified | 0        | 0        | 0        | 0        | 0        | 14       | 0        | 0        | 0        | 0        | 0   | 0        | 0        | 0        | 1        | 8       | 0       | 0       | 0       |
| k_Bacteria | p_Elusimicrobia  | c_Elusimicrobia       | o_Elusimicrobiales | f_Elusimicrobiaceae | g_Elusimicrobium | Unclassified | 0        | 0        | 0        | 0        | 0        | 47       | 55       | 24       | 0        | 25       | 0   | 0        | 0        | 0        | 0        | 109     | 109     | 527     | 61      |
| k_Bacteria | p_Firmicutes     | c_Clostridia          | o_Clostridiales    | f_Lachnospiraceae   | Unclassified     | Unclassified | 0        | 0        | 0        | 0        | 0        | 1        | 102      | 8        | 1        | 0        | 24  | 4        | 0        | 0        | 1        | 0       | 0       | 2       | 0       |
| k_Bacteria | p_Firmicutes     | c_Clostridia          | o_Clostridiales    | f_Lachnospiraceae   | Unclassified     | Unclassified | 0        | 0        | 0        | 0        | 0        | 7        | 0        | 0        | 2        | 0        | 0   | 0        | 0        | 0        | 0        | 0       | 0       | 0       | 0       |
| k_Bacteria | p_Bacteroidetes  | c_Bacteroidia         | o_Bacteroidales    | f_Prevotellaceae    | g_Prevotella     | Unclassified | 0        | 0        | 0        | 0        | 0        | 21       | 0        | 0        | 0        | 0        | 0   | 0        | 0        | 0        | 0        | 0       | 0       | 0       | 0       |
| k_Bacteria | p_Firmicutes     | c_Clostridia          | o_Clostridiales    | f_Lachnospiraceae   | Unclassified     | Unclassified | 0        | 0        | 0        | 0        | 0        | 5        | 0        | 0        | 0        | 0        | 30  | 0        | 0        | 0        | 8        | 1       | 0       | 9       | 0       |
| k_Bacteria | p_Tenericutes    | c_Mollicutes          | o_RF39             | Unclassified        | Unclassified     | Unclassified | 0        | 0        | 0        | 0        | 0        | 4        | 0        | 0        | 0        | 13       | 1   | 0        | 7        | 0        | 6        | 1       | 0       | 0       | 0       |
| k_Bacteria | p_Firmicutes     | c_Clostridia          | o_Clostridiales    | f_Ruminococcaceae   | g_Oscillospira   | Unclassified | 0        | 0        | 0        | 0        | 0        | 4        | 0        | 0        | 0        | 0        | 0   | 17       | 0        | 0        | 0        | 0       | 0       | 0       | 0       |
| k_Bacteria | p_Firmicutes     | Unclassified          | Unclassified       | Unclassified        | Unclassified     | Unclassified | 0        | 0        | 0        | 0        | 0        | 3        | 0        | 0        | 2        | 0        | 0   | 0        | 0        | 0        | 0        | 0       | 0       | 0       | 0       |
| k_Bacteria | p_Firmicutes     | c_Clostridia          | o_Clostridiales    | Unclassified        | Unclassified     | Unclassified | 0        | 0        | 0        | 0        | 0        | 1        | 0        | 2        | 3        | 3        | 0   | 1        | 9        | 0        | 1        | 4       | 2       | 2       | 0       |
| k_Bacteria | p_Firmicutes     | c_Clostridia          | o_Clostridiales    | f_Ruminococcaceae   | Unclassified     | Unclassified | 0        | 0        | 0        | 0        | 0        | 1        | 0        | 0        | 8        | 0        | 0   | 4        | 1        | 1        | 1        | 2       | 4       | 0       | 0       |
| k_Bacteria | p_Tenericutes    | c_Mollicutes          | o_RF39             | Unclassified        | Unclassified     | Unclassified | 0        | 0        | 0        | 0        | 0        | 22       | 0        | 0        | 0        | 0        | 0   | 0        | 0        | 0        | 0        | 0       | 0       | 0       | 0       |
| k_Bacteria | p_Firmicutes     | c_Clostridia          | o_Clostridiales    | f_Lachnospiraceae   | Unclassified     | Unclassified | 0        | 0        | 0        | 0        | 0        | 7        | 40       | 0        | 21       | 3        | 0   | 0        | 0        | 3        | 11       | 0       | 0       | 0       | 0       |
| k_Bacteria | p_Proteobacteria | c_Alphaproteobacteria | o_RF32             | Unclassified        | Unclassified     | Unclassified | 0        | 0        | 0        | 0        | 0        | 8        | 0        | 0        | 0        | 0        | 0   | 0        | 0        | 0        | 0        | 0       | 0       | 0       | 0       |

| Level_1    | Level_2         | Level_3       | Level_4         | Level_5              | Level_6      | Level_7      | ss1<br>0 | sn<br>15 | sn<br>16 | ss<br>19 | sn<br>20 | ss<br>21 | ss<br>25 | sn<br>26 | sn<br>27 | ss2<br>8 | ss2 | ss<br>30 | sn<br>31 | sn<br>35 | sn<br>36 | sn<br>5 | ss<br>6 | ss<br>8 | sn<br>9 |
|------------|-----------------|---------------|-----------------|----------------------|--------------|--------------|----------|----------|----------|----------|----------|----------|----------|----------|----------|----------|-----|----------|----------|----------|----------|---------|---------|---------|---------|
| k_Bacteria | p_Firmicutes    | c_Clostridia  | o_Clostridiales | f_Ruminococaceae     | Unclassified | Unclassified | 0        | 0        | 0        | 0        | 0        | 3        | 1        | 0        | 4        | 0        | 0   | 5        | 0        | 0        | 0        | 0       | 0       | 0       | 0       |
| k_Bacteria | p_Firmicutes    | c_Clostridia  | o_Clostridiales | f_Ruminococaceae     | Unclassified | Unclassified | 0        | 0        | 0        | 0        | 0        | 3        | 0        | 0        | 9        | 0        | 0   | 2        | 0        | 0        | 0        | 0       | 0       | 0       | 0       |
| k_Bacteria | Unclassified    | Unclassified  | Unclassified    | Unclassified         | Unclassified | Unclassified | 0        | 0        | 0        | 0        | 0        | 2        | 0        | 0        | 4        | 0        | 0   | 20       | 2        | 0        | 0        | 0       | 0       | 0       | 0       |
| k_Bacteria | p_Bacteroidetes | c_Bacteroidia | o_Bacteroidales | f_RF16               | Unclassified | Unclassified | 0        | 0        | 0        | 0        | 0        | 1        | 2        | 0        | 2        | 0        | 0   | 0        | 2        | 0        | 2        | 0       | 0       | 1       | 0       |
| k_Bacteria | p_Firmicutes    | c_Clostridia  | o_Clostridiales | f_[Mogibacteriaceae] | Unclassified | Unclassified | 0        | 0        | 0        | 0        | 0        | 4        | 0        | 0        | 2        | 0        | 0   | 0        | 0        | 0        | 0        | 3       | 0       | 0       | 0       |
| k_Bacteria | p_Firmicutes    | c_Clostridia  | o_Clostridiales | f_Ruminococaceae     | Unclassified | Unclassified | 0        | 0        | 0        | 0        | 0        | 2        | 10       | 1        | 0        | 0        | 0   | 0        | 0        | 0        | 0        | 0       | 3       | 0       | 14      |
| k_Bacteria | p_Bacteroidetes | c_Bacteroidia | o_Bacteroidales | f_S24-7              | Unclassified | Unclassified | 0        | 0        | 0        | 0        | 0        | 2        | 2        | 1        | 0        | 0        | 0   | 0        | 0        | 0        | 2        | 0       | 0       | 2       | 0       |
| k_Bacteria | p_Firmicutes    | c_Clostridia  | o_Clostridiales | f_Lachnospiraceae    | Unclassified | Unclassified | 0        | 0        | 0        | 0        | 0        | 1        | 0        | 0        | 4        | 0        | 0   | 0        | 0        | 0        | 0        | 2       | 0       | 0       | 6       |
| k_Bacteria | p_Bacteroidetes | Unclassified  | Unclassified    | Unclassified         | Unclassified | Unclassified | 0        | 0        | 0        | 0        | 0        | 2        | 0        | 0        | 2        | 0        | 0   | 0        | 7        | 0        | 0        | 0       | 0       | 0       | 0       |
| k_Bacteria | p_Bacteroidetes | c_Bacteroidia | o_Bacteroidales | Unclassified         | Unclassified | Unclassified | 0        | 0        | 0        | 0        | 0        | 1        | 3        | 0        | 0        | 0        | 0   | 0        | 4        | 1        | 1        | 0       | 1       | 0       | 0       |
| k_Bacteria | p_Bacteroidetes | c_Bacteroidia | o_Bacteroidales | Unclassified         | Unclassified | Unclassified | 0        | 0        | 0        | 0        | 0        | 2        | 0        | 1        | 1        | 0        | 0   | 0        | 0        | 8        | 3        | 2       | 0       | 1       | 1       |
| k_Bacteria | p_Firmicutes    | c_Clostridia  | o_Clostridiales | f_Ruminococaceae     | Unclassified | Unclassified | 0        | 0        | 0        | 0        | 0        | 1        | 0        | 0        | 1        | 0        | 0   | 0        | 0        | 0        | 0        | 0       | 0       | 0       | 1       |
| k_Bacteria | p_Firmicutes    | c_Clostridia  | o_Clostridiales | f_Lachnospiraceae    | Unclassified | Unclassified | 0        | 0        | 0        | 0        | 0        | 2        | 0        | 0        | 0        | 0        | 0   | 4        | 0        | 0        | 0        | 0       | 0       | 0       | 0       |
| k_Bacteria | p_Bacteroidetes | c_Bacteroidia | o_Bacteroidales | Unclassified         | Unclassified | Unclassified | 0        | 0        | 0        | 0        | 0        | 1        | 0        | 0        | 0        | 1        | 0   | 0        | 0        | 0        | 0        | 0       | 0       | 0       | 0       |

| Level_1    | Level_2         | Level_3       | Level_4           | Level_5            | Level_6         | Level_7        | ss10 | sn15 | sn16 | ss19 | sn20 | ss21 | ss25 | sn26 | sn27 | ss28 | ss2 | ss30 | sn31 | sn35 | sn36 | sn5 | ss6 | ss8 | sn9 |
|------------|-----------------|---------------|-------------------|--------------------|-----------------|----------------|------|------|------|------|------|------|------|------|------|------|-----|------|------|------|------|-----|-----|-----|-----|
| k_Bacteria | p_Firmicutes    | c_Clostridia  | o_Clostridiales   | f_Peptococcales    | Unclassified    | Unclassified   | 0    | 0    | 0    | 0    | 0    | 1    | 0    | 0    | 0    | 0    | 0   | 0    | 1    | 0    | 0    | 1   | 0   | 0   | 0   |
| k_Bacteria | p_Bacteroidetes | c_Bacteroidia | o_Bacteroidales   | f_S24-7            | Unclassified    | Unclassified   | 0    | 0    | 0    | 0    | 0    | 1    | 0    | 0    | 0    | 0    | 0   | 1    | 0    | 0    | 0    | 1   | 0   | 0   | 1   |
| k_Bacteria | p_Bacteroidetes | c_Bacteroidia | o_Bacteroidales   | f_S24-7            | Unclassified    | Unclassified   | 0    | 0    | 0    | 0    | 0    | 1    | 0    | 0    | 1    | 0    | 0   | 0    | 0    | 4    | 1    | 3   | 0   | 1   | 0   |
| k_Bacteria | p_Bacteroidetes | c_Bacteroidia | o_Bacteroidales   | f_S24-7            | Unclassified    | Unclassified   | 0    | 0    | 0    | 0    | 0    | 0    | 25   | 39   | 0    | 0    | 0   | 0    | 0    | 28   | 0    | 0   | 0   | 0   | 0   |
| k_Bacteria | p_Firmicutes    | c_Clostridia  | o_Clostridiales   | f_Ruminococcales   | g_Ruminococcus  | s_flavifaciens | 0    | 0    | 0    | 0    | 0    | 0    | 79   | 0    | 2    | 7    | 0   | 0    | 0    | 17   | 0    | 0   | 0   | 5   | 1   |
| k_Bacteria | p_Firmicutes    | c_Clostridia  | o_Clostridiales   | Unclassified       | Unclassified    | Unclassified   | 0    | 0    | 0    | 0    | 0    | 0    | 42   | 0    | 0    | 0    | 0   | 0    | 0    | 0    | 0    | 0   | 0   | 0   | 0   |
| k_Bacteria | p_Cyanobacteria | c_4C0d-2      | o_YS2             | Unclassified       | Unclassified    | Unclassified   | 0    | 0    | 0    | 0    | 0    | 0    | 8    | 0    | 0    | 0    | 0   | 0    | 0    | 0    | 0    | 0   | 0   | 0   | 0   |
| k_Bacteria | p_Tenericutes   | c_Mollicutes  | o_RF39            | Unclassified       | Unclassified    | Unclassified   | 0    | 0    | 0    | 0    | 0    | 0    | 2    | 0    | 0    | 3    | 2   | 0    | 0    | 0    | 0    | 0   | 0   | 0   | 0   |
| k_Bacteria | p_Cyanobacteria | c_4C0d-2      | o_YS2             | Unclassified       | Unclassified    | Unclassified   | 0    | 0    | 0    | 0    | 0    | 0    | 6    | 0    | 0    | 0    | 0   | 0    | 0    | 0    | 0    | 0   | 0   | 0   | 0   |
| k_Bacteria | p_Firmicutes    | c_Bacilli     | o_Lactobacillales | f_Lactobacillaceae | g_Lactobacillus | Unclassified   | 0    | 0    | 0    | 0    | 0    | 0    | 7    | 0    | 0    | 2    | 4   | 0    | 0    | 0    | 0    | 0   | 0   | 0   | 0   |
| k_Bacteria | p_Firmicutes    | c_Clostridia  | o_Clostridiales   | f_Ruminococcales   | Unclassified    | Unclassified   | 0    | 0    | 0    | 0    | 0    | 0    | 1    | 4    | 0    | 0    | 0   | 4    | 0    | 0    | 0    | 0   | 2   | 0   | 0   |
| k_Bacteria | Unclassified    | Unclassified  | Unclassified      | Unclassified       | Unclassified    | Unclassified   | 0    | 0    | 0    | 0    | 0    | 0    | 2    | 0    | 0    | 0    | 0   | 0    | 0    | 1    | 0    | 0   | 0   | 1   | 0   |
| k_Bacteria | p_Tenericutes   | c_Mollicutes  | o_RF39            | Unclassified       | Unclassified    | Unclassified   | 0    | 0    | 0    | 0    | 0    | 0    | 3    | 4    | 0    | 0    | 0   | 0    | 0    | 0    | 0    | 2   | 0   | 0   | 0   |
| k_Bacteria | p_Firmicutes    | c_Clostridia  | o_Clostridiales   | Unclassified       | Unclassified    | Unclassified   | 0    | 0    | 0    | 0    | 0    | 0    | 7    | 0    | 2    | 0    | 3   | 0    | 0    | 0    | 0    | 0   | 0   | 16  | 0   |



| Level_1    | Level_2         | Level_3           | Level_4              | Level_5               | Level_6           | Level_7      | ss10 | sn15 | sn16 | ss19 | sn20 | ss21 | ss25 | sn26 | sn27 | ss28 | ss2 | ss30 | sn31 | sn35 | sn36 | sn5 | ss6 | ss8 | sn9 |   |
|------------|-----------------|-------------------|----------------------|-----------------------|-------------------|--------------|------|------|------|------|------|------|------|------|------|------|-----|------|------|------|------|-----|-----|-----|-----|---|
| k_Bacteria | p_Firmicutes    | c_Bacilli         | o_Lactobacillales    | Unclassified          | Unclassified      | Unclassified | 0    | 0    | 0    | 0    | 0    | 0    | 1    | 0    | 0    | 0    | 0   | 0    | 0    | 3    | 0    | 0   | 0   | 0   | 0   |   |
| k_Bacteria | p_Firmicutes    | c_Clostridia      | o_Clostridiales      | f_Lachnospiraceae     | Unclassified      | Unclassified | 0    | 0    | 0    | 0    | 0    | 0    | 2    | 0    | 0    | 0    | 0   | 0    | 0    | 0    | 0    | 0   | 0   | 0   | 0   |   |
| k_Bacteria | Unclassified    | Unclassified      | Unclassified         | Unclassified          | Unclassified      | Unclassified | 0    | 0    | 0    | 0    | 0    | 0    | 2    | 0    | 0    | 0    | 0   | 0    | 0    | 0    | 0    | 0   | 0   | 0   | 0   |   |
| k_Bacteria | p_Firmicutes    | c_Clostridia      | o_Clostridiales      | f_Dehalobacteriaceae  | g_Dehalobacterium | Unclassified | 0    | 0    | 0    | 0    | 0    | 0    | 3    | 0    | 0    | 0    | 0   | 0    | 0    | 0    | 0    | 0   | 0   | 2   | 3   | 0 |
| k_Bacteria | p_Bacteroidetes | c_Bacteroidia     | o_Bacteroidales      | f_S24-7               | Unclassified      | Unclassified | 0    | 0    | 0    | 0    | 0    | 0    | 1    | 3    | 0    | 1    | 0   | 0    | 0    | 0    | 0    | 0   | 0   | 0   | 0   |   |
| k_Bacteria | p_Firmicutes    | c_Clostridia      | o_Clostridiales      | Unclassified          | Unclassified      | Unclassified | 0    | 0    | 0    | 0    | 0    | 0    | 2    | 0    | 0    | 0    | 0   | 1    | 0    | 1    | 0    | 0   | 0   | 0   | 0   |   |
| k_Bacteria | p_Firmicutes    | c_Clostridia      | o_Clostridiales      | f_Ruminococaceae      | g_Oscillospira    | Unclassified | 0    | 0    | 0    | 0    | 0    | 0    | 1    | 0    | 0    | 1    | 0   | 0    | 0    | 0    | 2    | 0   | 0   | 1   | 0   |   |
| k_Bacteria | p_Bacteroidetes | c_Bacteroidia     | o_Bacteroidales      | Unclassified          | Unclassified      | Unclassified | 0    | 0    | 0    | 0    | 0    | 0    | 1    | 0    | 1    | 0    | 0   | 0    | 0    | 0    | 0    | 0   | 0   | 0   | 1   |   |
| k_Bacteria | p_Bacteroidetes | c_Bacteroidia     | o_Bacteroidales      | f_S24-7               | Unclassified      | Unclassified | 0    | 0    | 0    | 0    | 0    | 0    | 1    | 1    | 0    | 1    | 1   | 0    | 0    | 0    | 0    | 1   | 0   | 1   | 0   |   |
| k_Bacteria | p_Firmicutes    | c_Clostridia      | o_Clostridiales      | Unclassified          | Unclassified      | Unclassified | 0    | 0    | 0    | 0    | 0    | 0    | 2    | 0    | 0    | 16   | 0   | 1    | 12   | 3    | 0    | 0   | 0   | 15  | 4   |   |
| k_Bacteria | p_Firmicutes    | c_Erysipelotrichi | o_Erysipelotrichales | f_Erysipelotrichaceae | Unclassified      | Unclassified | 0    | 0    | 0    | 0    | 0    | 0    | 1    | 5    | 0    | 0    | 0   | 0    | 0    | 0    | 0    | 0   | 0   | 0   | 0   |   |
| k_Bacteria | p_Firmicutes    | c_Erysipelotrichi | o_Erysipelotrichales | f_Erysipelotrichaceae | g_Coprobaecillus  | Unclassified | 0    | 0    | 0    | 0    | 0    | 0    | 1    | 4    | 0    | 0    | 0   | 0    | 0    | 0    | 0    | 0   | 0   | 0   | 0   |   |
| k_Bacteria | p_TM7           | c_TM7-3           | o_CW040              | f_F16                 | Unclassified      | Unclassified | 0    | 0    | 0    | 0    | 0    | 0    | 1    | 0    | 1    | 0    | 0   | 0    | 1    | 2    | 1    | 0   | 0   | 0   | 1   |   |
| k_Bacteria | p_Firmicutes    | c_Clostridia      | o_Clostridiales      | f_Ruminococaceae      | Unclassified      | Unclassified | 0    | 0    | 0    | 0    | 0    | 0    | 2    | 0    | 9    | 0    | 0   | 0    | 1    | 0    | 0    | 0   | 0   | 0   | 0   |   |

| Level_1    | Level_2          | Level_3               | Level_4         | Level_5                | Level_6        | Level_7      | ss10 | sn15 | sn16 | ss19 | sn20 | ss21 | ss25 | sn26 | sn27 | ss28 | ss2 | ss30 | sn31 | sn35 | sn36 | sn5 | ss6 | ss8 | sn9 |
|------------|------------------|-----------------------|-----------------|------------------------|----------------|--------------|------|------|------|------|------|------|------|------|------|------|-----|------|------|------|------|-----|-----|-----|-----|
| k_Bacteria | Unclassified     | Unclassified          | Unclassified    | Unclassified           | Unclassified   | Unclassified | 0    | 0    | 0    | 0    | 0    | 0    | 1    | 0    | 0    | 0    | 0   | 0    | 0    | 0    | 1    | 0   | 0   | 0   | 0   |
| k_Bacteria | p_Bacteroidetes  | c_Bacteroidia         | o_Bacteroidales | f_S24-7                | Unclassified   | Unclassified | 0    | 0    | 0    | 0    | 0    | 0    | 0    | 138  | 0    | 0    | 0   | 0    | 0    | 6    | 0    | 0   | 0   | 0   | 0   |
| k_Bacteria | p_Bacteroidetes  | c_Bacteroidia         | o_Bacteroidales | f_S24-7                | Unclassified   | Unclassified | 0    | 0    | 0    | 0    | 0    | 0    | 0    | 66   | 0    | 0    | 0   | 0    | 0    | 0    | 0    | 0   | 0   | 0   | 0   |
| k_Bacteria | p_Proteobacteria | c_Alphaproteobacteria | o_RF32          | Unclassified           | Unclassified   | Unclassified | 0    | 0    | 0    | 0    | 0    | 0    | 0    | 46   | 0    | 0    | 0   | 0    | 0    | 0    | 0    | 0   | 0   | 0   | 0   |
| k_Bacteria | p_Firmicutes     | c_Clostridia          | o_Clostridiales | f_Lachnospiraceae      | Unclassified   | Unclassified | 0    | 0    | 0    | 0    | 0    | 0    | 0    | 55   | 0    | 0    | 14  | 0    | 0    | 177  | 0    | 0   | 0   | 0   | 5   |
| k_Bacteria | p_Proteobacteria | c_Alphaproteobacteria | o_RF32          | Unclassified           | Unclassified   | Unclassified | 0    | 0    | 0    | 0    | 0    | 0    | 0    | 11   | 0    | 0    | 0   | 0    | 0    | 0    | 0    | 0   | 1   | 0   | 0   |
| k_Bacteria | p_Bacteroidetes  | c_Bacteroidia         | o_Bacteroidales | Unclassified           | Unclassified   | Unclassified | 0    | 0    | 0    | 0    | 0    | 0    | 0    | 1    | 0    | 0    | 0   | 0    | 0    | 2    | 0    | 0   | 0   | 0   | 0   |
| k_Bacteria | p_Firmicutes     | c_Clostridia          | o_Clostridiales | f_Ruminococaceae       | Unclassified   | Unclassified | 0    | 0    | 0    | 0    | 0    | 0    | 0    | 10   | 0    | 0    | 0   | 0    | 0    | 0    | 0    | 0   | 21  | 2   | 0   |
| k_Bacteria | Unclassified     | Unclassified          | Unclassified    | Unclassified           | Unclassified   | Unclassified | 0    | 0    | 0    | 0    | 0    | 0    | 0    | 7    | 0    | 0    | 0   | 0    | 0    | 0    | 0    | 29  | 18  | 0   | 0   |
| k_Bacteria | p_Firmicutes     | c_Clostridia          | o_Clostridiales | f_Ruminococaceae       | Unclassified   | Unclassified | 0    | 0    | 0    | 0    | 0    | 0    | 0    | 2    | 0    | 0    | 1   | 0    | 0    | 0    | 0    | 1   | 0   | 0   | 0   |
| k_Bacteria | p_Firmicutes     | c_Clostridia          | o_Clostridiales | f_Lachnospiraceae      | Unclassified   | Unclassified | 0    | 0    | 0    | 0    | 0    | 0    | 0    | 4    | 0    | 0    | 0   | 0    | 0    | 1    | 0    | 0   | 0   | 0   | 0   |
| k_Bacteria | p_Bacteroidetes  | c_Bacteroidia         | o_Bacteroidales | f_[Paraprevotellaceae] | g_[Prevotella] | Unclassified | 0    | 0    | 0    | 0    | 0    | 0    | 0    | 1    | 0    | 0    | 0   | 0    | 1    | 1    | 0    | 0   | 0   | 0   | 1   |
| k_Bacteria | p_Firmicutes     | c_Clostridia          | o_Clostridiales | f_Ruminococaceae       | g_Ruminococcus | Unclassified | 0    | 0    | 0    | 0    | 0    | 0    | 0    | 8    | 0    | 0    | 0   | 0    | 0    | 0    | 0    | 0   | 0   | 0   | 0   |
| k_Bacteria | p_Cyanobacteria  | c_4C0d-2              | o_YS2           | Unclassified           | Unclassified   | Unclassified | 0    | 0    | 0    | 0    | 0    | 0    | 0    | 3    | 0    | 0    | 0   | 0    | 0    | 0    | 0    | 0   | 0   | 0   | 0   |

| Level_1    | Level_2          | Level_3               | Level_4              | Level_5               | Level_6                  | Level_7      | ss10 | sn15 | sn16 | ss19 | sn20 | ss21 | ss25 | sn26 | sn27 | ss28 | ss2 | ss30 | sn31 | sn35 | sn36 | sn5 | ss6 | ss8 | sn9 |
|------------|------------------|-----------------------|----------------------|-----------------------|--------------------------|--------------|------|------|------|------|------|------|------|------|------|------|-----|------|------|------|------|-----|-----|-----|-----|
| k_Bacteria | p_Firmicutes     | c_Clostridia          | o_Clostridiales      | f_Ruminococaceae      | Unclassified             | Unclassified | 0    | 0    | 0    | 0    | 0    | 0    | 0    | 1    | 0    | 0    | 0   | 0    | 0    | 0    | 0    | 0   | 1   | 0   | 0   |
| k_Bacteria | p_Bacteroidetes  | c_Bacteroidia         | o_Bacteroidales      | f_Prevotellaceae      | g_Prevotella             | s_copri      | 0    | 0    | 0    | 0    | 0    | 0    | 0    | 2    | 0    | 0    | 0   | 0    | 0    | 0    | 0    | 0   | 0   | 0   | 0   |
| k_Bacteria | p_Firmicutes     | c_Clostridia          | o_Clostridiales      | f_Lachnospiraceae     | g_Coproccus              | Unclassified | 0    | 0    | 0    | 0    | 0    | 0    | 0    | 12   | 0    | 0    | 0   | 0    | 0    | 0    | 0    | 0   | 0   | 0   | 0   |
| k_Bacteria | p_TM7            | c_TM7-3               | o_CW040              | f_F16                 | Unclassified             | Unclassified | 0    | 0    | 0    | 0    | 0    | 0    | 0    | 2    | 0    | 3    | 0   | 1    | 0    | 6    | 0    | 2   | 0   | 0   |     |
| k_Bacteria | p_Firmicutes     | c_Clostridia          | o_Clostridiales      | f_Ruminococaceae      | g_Oscillospira           | Unclassified | 0    | 0    | 0    | 0    | 0    | 0    | 0    | 4    | 0    | 0    | 0   | 0    | 5    | 0    | 0    | 0   | 0   | 0   |     |
| k_Bacteria | p_Firmicutes     | c_Clostridia          | o_Clostridiales      | f_Clostridiaceae      | g_Candidatus Arthromitus | Unclassified | 0    | 0    | 0    | 0    | 0    | 0    | 0    | 10   | 0    | 0    | 0   | 0    | 0    | 0    | 0    | 0   | 0   | 0   |     |
| k_Bacteria | p_Firmicutes     | c_Clostridia          | o_Clostridiales      | Unclassified          | Unclassified             | Unclassified | 0    | 0    | 0    | 0    | 0    | 0    | 0    | 1    | 0    | 1    | 0   | 1    | 5    | 0    | 0    | 0   | 0   | 0   |     |
| k_Bacteria | p_Proteobacteria | c_Alphaproteobacteria | o_RF32               | Unclassified          | Unclassified             | Unclassified | 0    | 0    | 0    | 0    | 0    | 0    | 0    | 7    | 4    | 0    | 0   | 0    | 0    | 12   | 0    | 8   | 0   | 0   |     |
| k_Bacteria | p_Bacteroidetes  | c_Bacteroidia         | o_Bacteroidales      | f_Prevotellaceae      | g_Prevotella             | Unclassified | 0    | 0    | 0    | 0    | 0    | 0    | 0    | 1    | 0    | 0    | 0   | 0    | 1    | 3    | 0    | 0   | 33  | 1   |     |
| k_Bacteria | p_Proteobacteria | c_Alphaproteobacteria | Unclassified         | Unclassified          | Unclassified             | Unclassified | 0    | 0    | 0    | 0    | 0    | 0    | 0    | 1    | 0    | 0    | 0   | 0    | 0    | 8    | 1    | 8   | 2   | 0   |     |
| k_Bacteria | p_Firmicutes     | c_Clostridia          | o_Clostridiales      | f_Dehalobacteriaceae  | g_Dehalobacterium        | Unclassified | 0    | 0    | 0    | 0    | 0    | 0    | 0    | 7    | 0    | 3    | 0   | 0    | 0    | 0    | 0    | 0   | 2   | 2   | 0   |
| k_Bacteria | p_Firmicutes     | c_Erysipelotrichi     | o_Erysipelotrichales | f_Erysipelotrichaceae | g_Allobaculum            | Unclassified | 0    | 0    | 0    | 0    | 0    | 0    | 0    | 7    | 0    | 0    | 0   | 3    | 0    | 0    | 0    | 14  | 2   | 3   |     |
| k_Bacteria | p_Teneriutes     | c_Mollicutes          | o_RF39               | Unclassified          | Unclassified             | Unclassified | 0    | 0    | 0    | 0    | 0    | 0    | 0    | 1    | 0    | 0    | 0   | 0    | 2    | 0    | 0    | 0   | 0   | 0   |     |
| k_Bacteria | p_Bacteroidetes  | c_Bacteroidia         | o_Bacteroidales      | f_Prevotellaceae      | g_Prevotella             | Unclassified | 0    | 0    | 0    | 0    | 0    | 0    | 0    | 3    | 0    | 0    | 1   | 0    | 0    | 0    | 0    | 0   | 0   | 0   |     |

| Level_1    | Level_2          | Level_3          | Level_4            | Level_5             | Level_6          | Level_7      | ss10 | sn15 | sn16 | ss19 | sn20 | ss21 | ss25 | sn26 | sn27 | ss28 | ss2 | ss30 | sn31 | sn35 | sn36 | sn5 | ss6 | ss8 | sn9 |
|------------|------------------|------------------|--------------------|---------------------|------------------|--------------|------|------|------|------|------|------|------|------|------|------|-----|------|------|------|------|-----|-----|-----|-----|
| k_Bacteria | p_Firmicutes     | c_Clostridia     | Unclassified       | Unclassified        | Unclassified     | Unclassified | 0    | 0    | 0    | 0    | 0    | 0    | 0    | 0    | 1    | 0    | 0   | 1    | 2    | 0    | 0    | 0   | 0   | 0   | 0   |
| k_Bacteria | p_Firmicutes     | c_Clostridia     | o_Clostridiales    | f_Ruminococaceae    | Unclassified     | Unclassified | 0    | 0    | 0    | 0    | 0    | 0    | 0    | 0    | 1    | 0    | 0   | 0    | 0    | 0    | 5    | 3   | 0   | 18  | 12  |
| k_Bacteria | p_Tenericutes    | c_Mollicutes     | o_RF39             | Unclassified        | Unclassified     | Unclassified | 0    | 0    | 0    | 0    | 0    | 0    | 0    | 0    | 1    | 2    | 3   | 0    | 0    | 0    | 3    | 0   | 0   | 0   | 0   |
| k_Bacteria | p_Firmicutes     | Unclassified     | Unclassified       | Unclassified        | Unclassified     | Unclassified | 0    | 0    | 0    | 0    | 0    | 0    | 0    | 0    | 1    | 0    | 0   | 1    | 0    | 0    | 0    | 1   | 0   | 0   | 0   |
| k_Bacteria | p_Firmicutes     | c_Clostridia     | o_Clostridiales    | f_Ruminococaceae    | Unclassified     | Unclassified | 0    | 0    | 0    | 0    | 0    | 0    | 0    | 0    | 1    | 1    | 0   | 1    | 0    | 1    | 1    | 0   | 0   | 0   | 0   |
| k_Bacteria | p_Bacteroidetes  | c_Bacteroidia    | o_Bacteroidales    | f_Prevotellaceae    | g_Prevotellaceae | Unclassified | 0    | 0    | 0    | 0    | 0    | 0    | 0    | 0    | 1    | 0    | 0   | 0    | 0    | 0    | 0    | 1   | 0   | 0   | 0   |
| k_Bacteria | p_Tenericutes    | c_Mollicutes     | o_RF39             | Unclassified        | Unclassified     | Unclassified | 0    | 0    | 0    | 0    | 0    | 0    | 0    | 0    | 2    | 0    | 0   | 0    | 2    | 0    | 0    | 0   | 0   | 0   | 0   |
| k_Bacteria | p_Tenericutes    | c_Mollicutes     | o_RF39             | Unclassified        | Unclassified     | Unclassified | 0    | 0    | 0    | 0    | 0    | 0    | 0    | 0    | 1    | 0    | 0   | 0    | 0    | 2    | 6    | 1   | 0   | 2   | 1   |
| k_Bacteria | p_Firmicutes     | c_Clostridia     | o_Clostridiales    | Unclassified        | Unclassified     | Unclassified | 0    | 0    | 0    | 0    | 0    | 0    | 0    | 0    | 1    | 1    | 0   | 1    | 0    | 0    | 0    | 0   | 0   | 0   | 1   |
| k_Bacteria | p_Firmicutes     | c_Clostridia     | o_Clostridiales    | f_Lachnospiraceae   | Unclassified     | Unclassified | 0    | 0    | 0    | 0    | 0    | 0    | 0    | 0    | 1    | 0    | 0   | 69   | 6    | 0    | 0    | 0   | 0   | 0   | 0   |
| k_Bacteria | p_Bacteroidetes  | c_Bacteroidia    | o_Bacteroidales    | f_Rikenellaceae     | Unclassified     | Unclassified | 0    | 0    | 0    | 0    | 0    | 0    | 0    | 0    | 1    | 0    | 0   | 3    | 0    | 0    | 0    | 0   | 2   | 1   | 0   |
| k_Bacteria | p_Firmicutes     | c_Clostridia     | o_Clostridiales    | f_Ruminococaceae    | Unclassified     | Unclassified | 0    | 0    | 0    | 0    | 0    | 0    | 0    | 0    | 1    | 0    | 0   | 1    | 0    | 1    | 0    | 0   | 0   | 0   | 0   |
| k_Bacteria | p_Actinobacteria | c_Coriobacteriia | o_Coriobacteriales | f_Coriobacteriaceae | g_Adlercreutzia  | Unclassified | 0    | 0    | 0    | 0    | 0    | 0    | 0    | 0    | 1    | 0    | 0   | 1    | 0    | 1    | 0    | 0   | 0   | 0   | 0   |
| k_Bacteria | p_Tenericutes    | c_Mollicutes     | o_RF39             | Unclassified        | Unclassified     | Unclassified | 0    | 0    | 0    | 0    | 0    | 0    | 0    | 0    | 0    | 3    | 0   | 0    | 0    | 0    | 0    | 0   | 0   | 0   | 1   |

| Level_1    | Level_2         | Level_3           | Level_4              | Level_5               | Level_6         | Level_7      | ss10 | sn15 | sn16 | ss19 | sn20 | ss21 | ss25 | sn26 | sn27 | ss28 | ss2 | ss30 | sn31 | sn35 | sn36 | sn5 | ss6 | ss8 | sn9 |
|------------|-----------------|-------------------|----------------------|-----------------------|-----------------|--------------|------|------|------|------|------|------|------|------|------|------|-----|------|------|------|------|-----|-----|-----|-----|
| k_Bacteria | p_Firmicutes    | c_Erysipelotrichi | o_Erysipelotrichales | f_Erysipelotrichaceae | g_Allobaculum   | Unclassified | 0    | 0    | 0    | 0    | 0    | 0    | 0    | 0    | 0    | 2    | 0   | 0    | 0    | 0    | 0    | 0   | 0   | 0   | 0   |
| k_Bacteria | p_Firmicutes    | c_Clostridia      | o_Clostridiales      | f_[Mogibacteriaceae]  | g_Mogibacterium | Unclassified | 0    | 0    | 0    | 0    | 0    | 0    | 0    | 0    | 0    | 1    | 0   | 0    | 0    | 0    | 3    | 0   | 0   | 0   | 0   |
| k_Bacteria | p_Firmicutes    | c_Clostridia      | o_Clostridiales      | Unclassified          | Unclassified    | Unclassified | 0    | 0    | 0    | 0    | 0    | 0    | 0    | 0    | 0    | 0    | 21  | 0    | 0    | 0    | 0    | 0   | 0   | 17  | 0   |
| k_Bacteria | p_Firmicutes    | c_Clostridia      | o_Clostridiales      | f_Ruminococcaceae     | g_Ruminococcus  | Unclassified | 0    | 0    | 0    | 0    | 0    | 0    | 0    | 0    | 0    | 0    | 2   | 0    | 1    | 0    | 0    | 0   | 0   | 0   | 0   |
| k_Bacteria | p_Cyanobacteria | c_4C0d-2          | o_YS2                | Unclassified          | Unclassified    | Unclassified | 0    | 0    | 0    | 0    | 0    | 0    | 0    | 0    | 0    | 0    | 9   | 19   | 0    | 0    | 0    | 0   | 0   | 0   | 0   |
| k_Bacteria | p_Firmicutes    | c_Clostridia      | o_Clostridiales      | Unclassified          | Unclassified    | Unclassified | 0    | 0    | 0    | 0    | 0    | 0    | 0    | 0    | 0    | 0    | 1   | 0    | 0    | 567  | 0    | 0   | 0   | 0   | 0   |
| k_Bacteria | p_Firmicutes    | c_Clostridia      | o_Clostridiales      | f_Ruminococcaceae     | g_Oscillospira  | Unclassified | 0    | 0    | 0    | 0    | 0    | 0    | 0    | 0    | 0    | 0    | 3   | 0    | 0    | 0    | 0    | 2   | 0   | 0   | 0   |
| k_Bacteria | p_Firmicutes    | c_Clostridia      | o_Clostridiales      | f_Lachnospiraceae     | Unclassified    | Unclassified | 0    | 0    | 0    | 0    | 0    | 0    | 0    | 0    | 0    | 0    | 1   | 0    | 0    | 0    | 1    | 0   | 0   | 0   | 0   |
| k_Bacteria | p_Firmicutes    | Unclassified      | Unclassified         | Unclassified          | Unclassified    | Unclassified | 0    | 0    | 0    | 0    | 0    | 0    | 0    | 0    | 0    | 0    | 0   | 3    | 0    | 0    | 0    | 0   | 0   | 1   | 0   |
| k_Bacteria | p_Firmicutes    | c_Clostridia      | o_Clostridiales      | f_Ruminococcaceae     | g_Ruminococcus  | Unclassified | 0    | 0    | 0    | 0    | 0    | 0    | 0    | 0    | 0    | 0    | 0   | 11   | 1    | 1    | 0    | 0   | 0   | 0   | 1   |
| k_Bacteria | p_Firmicutes    | c_Clostridia      | o_Clostridiales      | f_Ruminococcaceae     | g_Oscillospira  | Unclassified | 0    | 0    | 0    | 0    | 0    | 0    | 0    | 0    | 0    | 0    | 0   | 8    | 0    | 0    | 0    | 5   | 1   | 1   | 0   |
| k_Bacteria | p_Firmicutes    | c_Clostridia      | o_Clostridiales      | f_Lachnospiraceae     | Unclassified    | Unclassified | 0    | 0    | 0    | 0    | 0    | 0    | 0    | 0    | 0    | 0    | 0   | 16   | 0    | 0    | 0    | 0   | 0   | 4   | 0   |
| k_Bacteria | p_Firmicutes    | c_Clostridia      | o_Clostridiales      | f_Ruminococcaceae     | Unclassified    | Unclassified | 0    | 0    | 0    | 0    | 0    | 0    | 0    | 0    | 0    | 0    | 0   | 2    | 0    | 0    | 0    | 0   | 0   | 0   | 0   |
| k_Bacteria | p_Firmicutes    | Unclassified      | Unclassified         | Unclassified          | Unclassified    | Unclassified | 0    | 0    | 0    | 0    | 0    | 0    | 0    | 0    | 0    | 0    | 0   | 7    | 2    | 1    | 0    | 0   | 0   | 0   | 0   |

| Level_1    | Level_2          | Level_3              | Level_4              | Level_5                | Level_6          | Level_7      | ss10 | sn15 | sn16 | ss19 | sn20 | ss21 | ss25 | sn26 | sn27 | ss28 | ss2 | ss30 | sn31 | sn35 | sn36 | sn5 | ss6 | ss8 | sn9 |
|------------|------------------|----------------------|----------------------|------------------------|------------------|--------------|------|------|------|------|------|------|------|------|------|------|-----|------|------|------|------|-----|-----|-----|-----|
| k_Bacteria | p_Teneritales    | c_Mollicutes         | o_RF39               | Unclassified           | Unclassified     | Unclassified | 0    | 0    | 0    | 0    | 0    | 0    | 0    | 0    | 0    | 0    | 0   | 2    | 0    | 0    | 0    | 0   | 0   | 0   | 2   |
| k_Bacteria | p_Firmicutes     | c_Clostridia         | o_Clostridiales      | Unclassified           | Unclassified     | Unclassified | 0    | 0    | 0    | 0    | 0    | 0    | 0    | 0    | 0    | 0    | 0   | 2    | 2    | 0    | 0    | 0   | 1   | 0   | 0   |
| k_Bacteria | p_Bacteroidetes  | c_Bacteroidia        | o_Bacteroidales      | Unclassified           | Unclassified     | Unclassified | 0    | 0    | 0    | 0    | 0    | 0    | 0    | 0    | 0    | 0    | 0   | 1    | 0    | 1    | 0    | 1   | 0   | 0   | 1   |
| k_Bacteria | p_Firmicutes     | c_Erysipelotrichi    | o_Erysipelotrichales | f_Erysipelotrichaceae  | Unclassified     | Unclassified | 0    | 0    | 0    | 0    | 0    | 0    | 0    | 0    | 0    | 0    | 0   | 1    | 0    | 0    | 0    | 1   | 0   | 0   | 0   |
| k_Bacteria | p_Firmicutes     | c_Erysipelotrichi    | o_Erysipelotrichales | f_Erysipelotrichaceae  | g_RFN20          | Unclassified | 0    | 0    | 0    | 0    | 0    | 0    | 0    | 0    | 0    | 0    | 0   | 1    | 0    | 1    | 0    | 0   | 0   | 0   | 0   |
| k_Bacteria | p_Proteobacteria | c_Betaproteobacteria | Unclassified         | Unclassified           | Unclassified     | Unclassified | 0    | 0    | 0    | 0    | 0    | 0    | 0    | 0    | 0    | 0    | 0   | 1    | 0    | 0    | 0    | 0   | 1   | 0   | 0   |
| k_Bacteria | p_Actinobacteria | c_Coriobacteriia     | o_Coriobacteriales   | f_Coriobacteriaceae    | Unclassified     | Unclassified | 0    | 0    | 0    | 0    | 0    | 0    | 0    | 0    | 0    | 0    | 0   | 4    | 0    | 0    | 0    | 0   | 0   | 0   | 0   |
| k_Bacteria | Unclassified     | Unclassified         | Unclassified         | Unclassified           | Unclassified     | Unclassified | 0    | 0    | 0    | 0    | 0    | 0    | 0    | 0    | 0    | 0    | 0   | 4    | 0    | 0    | 0    | 0   | 0   | 0   | 0   |
| k_Bacteria | p_Firmicutes     | c_Clostridia         | o_Clostridiales      | f_Lachnospiraceae      | g_[Ruminococcus] | Unclassified | 0    | 0    | 0    | 0    | 0    | 0    | 0    | 0    | 0    | 0    | 0   | 1    | 0    | 0    | 0    | 0   | 2   | 0   | 0   |
| k_Bacteria | p_Firmicutes     | c_Clostridia         | o_Clostridiales      | Unclassified           | Unclassified     | Unclassified | 0    | 0    | 0    | 0    | 0    | 0    | 0    | 0    | 0    | 0    | 0   | 4    | 1    | 0    | 0    | 0   | 0   | 0   | 0   |
| k_Bacteria | p_Bacteroidetes  | c_Bacteroidia        | o_Bacteroidales      | f_[Paraprevotellaceae] | g_[Prevotella]   | Unclassified | 0    | 0    | 0    | 0    | 0    | 0    | 0    | 0    | 0    | 0    | 0   | 4    | 0    | 1    | 0    | 0   | 1   | 0   | 1   |
| k_Bacteria | p_Firmicutes     | c_Clostridia         | o_Clostridiales      | f_Ruminococcaceae      | Unclassified     | Unclassified | 0    | 0    | 0    | 0    | 0    | 0    | 0    | 0    | 0    | 0    | 0   | 1    | 0    | 0    | 0    | 3   | 0   | 1   | 3   |
| k_Bacteria | p_Firmicutes     | c_Clostridia         | o_Clostridiales      | f_Ruminococcaceae      | g_Ruminococcus   | Unclassified | 0    | 0    | 0    | 0    | 0    | 0    | 0    | 0    | 0    | 0    | 0   | 2    | 2    | 0    | 2    | 0   | 2   | 2   | 1   |
| k_Bacteria | p_Firmicutes     | c_Clostridia         | o_Clostridiales      | f_Ruminococcaceae      | Unclassified     | Unclassified | 0    | 0    | 0    | 0    | 0    | 0    | 0    | 0    | 0    | 0    | 0   | 4    | 1    | 1    | 0    | 0   | 0   | 2   | 3   |

| Level_1    | Level_2          | Level_3               | Level_4           | Level_5            | Level_6         | Level_7      | ss10 | sn15 | sn16 | ss19 | sn20 | ss21 | ss25 | sn26 | sn27 | ss28 | ss2 | ss30 | sn31 | sn35 | sn36 | sn5 | ss6 | ss8 | sn9 |
|------------|------------------|-----------------------|-------------------|--------------------|-----------------|--------------|------|------|------|------|------|------|------|------|------|------|-----|------|------|------|------|-----|-----|-----|-----|
| k_Bacteria | p_Firmicutes     | c_Clostridia          | o_Clostridiales   | Unclassified       | Unclassified    | Unclassified | 0    | 0    | 0    | 0    | 0    | 0    | 0    | 0    | 0    | 0    | 0   | 3    | 0    | 0    | 0    | 0   | 0   | 0   | 0   |
| k_Bacteria | p_Firmicutes     | c_Clostridia          | o_Clostridiales   | f_Ruminococaceae   | Unclassified    | Unclassified | 0    | 0    | 0    | 0    | 0    | 0    | 0    | 0    | 0    | 0    | 0   | 1    | 1    | 0    | 0    | 0   | 3   | 0   | 0   |
| k_Bacteria | Unclassified     | Unclassified          | Unclassified      | Unclassified       | Unclassified    | Unclassified | 0    | 0    | 0    | 0    | 0    | 0    | 0    | 0    | 0    | 0    | 0   | 1    | 0    | 0    | 0    | 0   | 1   | 0   | 0   |
| k_Bacteria | p_Firmicutes     | c_Clostridia          | o_Clostridiales   | Unclassified       | Unclassified    | Unclassified | 0    | 0    | 0    | 0    | 0    | 0    | 0    | 0    | 0    | 0    | 0   | 1    | 1    | 1    | 0    | 0   | 1   | 0   | 0   |
| k_Bacteria | p_Firmicutes     | c_Clostridia          | o_Clostridiales   | f_Ruminococaceae   | Unclassified    | Unclassified | 0    | 0    | 0    | 0    | 0    | 0    | 0    | 0    | 0    | 0    | 0   | 1    | 0    | 1    | 1    | 0   | 0   | 0   | 0   |
| k_Bacteria | p_Firmicutes     | c_Clostridia          | o_Clostridiales   | Unclassified       | Unclassified    | Unclassified | 0    | 0    | 0    | 0    | 0    | 0    | 0    | 0    | 0    | 0    | 0   | 0    | 2    | 0    | 0    | 0   | 0   | 0   | 0   |
| k_Bacteria | p_Proteobacteria | c_Alphaproteobacteria | o_Rickettsiales   | Unclassified       | Unclassified    | Unclassified | 0    | 0    | 0    | 0    | 0    | 0    | 0    | 0    | 0    | 0    | 0   | 0    | 6    | 12   | 3    | 0   | 0   | 0   | 0   |
| k_Bacteria | p_Firmicutes     | c_Clostridia          | o_Clostridiales   | Unclassified       | Unclassified    | Unclassified | 0    | 0    | 0    | 0    | 0    | 0    | 0    | 0    | 0    | 0    | 0   | 0    | 2    | 0    | 0    | 0   | 0   | 0   | 0   |
| k_Bacteria | p_Actinobacteria | c_Actinobacteria      | o_Actinomycetales | f_Actinomycetaceae | g_Actinomycetes | Unclassified | 0    | 0    | 0    | 0    | 0    | 0    | 0    | 0    | 0    | 0    | 0   | 0    | 1    | 0    | 0    | 1   | 0   | 0   | 2   |
| k_Bacteria | p_Tenericutes    | c_Mollicutes          | o_RF39            | Unclassified       | Unclassified    | Unclassified | 0    | 0    | 0    | 0    | 0    | 0    | 0    | 0    | 0    | 0    | 0   | 0    | 2    | 0    | 0    | 0   | 0   | 0   | 0   |
| k_Bacteria | p_Firmicutes     | c_Clostridia          | o_Clostridiales   | Unclassified       | Unclassified    | Unclassified | 0    | 0    | 0    | 0    | 0    | 0    | 0    | 0    | 0    | 0    | 0   | 0    | 1    | 0    | 0    | 4   | 0   | 7   | 0   |
| k_Bacteria | Unclassified     | Unclassified          | Unclassified      | Unclassified       | Unclassified    | Unclassified | 0    | 0    | 0    | 0    | 0    | 0    | 0    | 0    | 0    | 0    | 0   | 0    | 1    | 0    | 0    | 0   | 0   | 2   | 0   |
| k_Bacteria | p_Firmicutes     | c_Clostridia          | o_Clostridiales   | Unclassified       | Unclassified    | Unclassified | 0    | 0    | 0    | 0    | 0    | 0    | 0    | 0    | 0    | 0    | 0   | 0    | 1    | 0    | 0    | 0   | 0   | 5   | 0   |
| k_Bacteria | p_Firmicutes     | c_Clostridia          | o_Clostridiales   | f_Ruminococaceae   | Unclassified    | Unclassified | 0    | 0    | 0    | 0    | 0    | 0    | 0    | 0    | 0    | 0    | 0   | 0    | 1    | 0    | 0    | 1   | 0   | 0   | 0   |

| Level_1    | Level_2        | Level_3         | Level_4           | Level_5             | Level_6         | Level_7      | ss10 | sn15 | sn16 | ss19 | sn20 | ss21 | ss25 | sn26 | sn27 | ss28 | ss2 | ss30 | sn31 | sn35 | sn36 | sn5 | ss6 | ss8 | sn9 |
|------------|----------------|-----------------|-------------------|---------------------|-----------------|--------------|------|------|------|------|------|------|------|------|------|------|-----|------|------|------|------|-----|-----|-----|-----|
| k_Bacteria | p_Fusobacteria | c_Fusobacteriia | o_Fusobacteriales | f_Fusobacteriaceae  | Unclassified    | Unclassified | 0    | 0    | 0    | 0    | 0    | 0    | 0    | 0    | 0    | 0    | 0   | 0    | 1    | 3    | 0    | 3   | 0   | 0   | 0   |
| k_Bacteria | p_Firmicutes   | c_Clostridia    | o_Clostridiales   | f_Lachnospiraceae   | g_Coproccus     | Unclassified | 0    | 0    | 0    | 0    | 0    | 0    | 0    | 0    | 0    | 0    | 0   | 0    | 0    | 448  | 4    | 0   | 0   | 0   | 0   |
| k_Bacteria | p_Firmicutes   | Unclassified    | Unclassified      | Unclassified        | Unclassified    | Unclassified | 0    | 0    | 0    | 0    | 0    | 0    | 0    | 0    | 0    | 0    | 0   | 0    | 0    | 10   | 0    | 0   | 0   | 0   | 0   |
| k_Bacteria | p_Firmicutes   | c_Clostridia    | o_Clostridiales   | Unclassified        | Unclassified    | Unclassified | 0    | 0    | 0    | 0    | 0    | 0    | 0    | 0    | 0    | 0    | 0   | 0    | 0    | 37   | 0    | 0   | 0   | 0   | 8   |
| k_Bacteria | p_Firmicutes   | c_Clostridia    | o_Clostridiales   | f_Lachnospiraceae   | Unclassified    | Unclassified | 0    | 0    | 0    | 0    | 0    | 0    | 0    | 0    | 0    | 0    | 0   | 0    | 0    | 2    | 0    | 0   | 0   | 0   | 0   |
| k_Bacteria | p_Tenericutes  | c_Mollicutes    | o_RF39            | Unclassified        | Unclassified    | Unclassified | 0    | 0    | 0    | 0    | 0    | 0    | 0    | 0    | 0    | 0    | 0   | 0    | 0    | 19   | 0    | 0   | 0   | 0   | 0   |
| k_Bacteria | p_Firmicutes   | c_Clostridia    | o_Clostridiales   | f_Ruminococaceae    | g_Ruminococcus  | Unclassified | 0    | 0    | 0    | 0    | 0    | 0    | 0    | 0    | 0    | 0    | 0   | 0    | 0    | 1    | 0    | 1   | 0   | 0   | 3   |
| k_Bacteria | Unclassified   | Unclassified    | Unclassified      | Unclassified        | Unclassified    | Unclassified | 0    | 0    | 0    | 0    | 0    | 0    | 0    | 0    | 0    | 0    | 0   | 0    | 0    | 6    | 0    | 1   | 0   | 0   | 0   |
| k_Bacteria | Unclassified   | Unclassified    | Unclassified      | Unclassified        | Unclassified    | Unclassified | 0    | 0    | 0    | 0    | 0    | 0    | 0    | 0    | 0    | 0    | 0   | 0    | 0    | 2    | 0    | 0   | 0   | 0   | 0   |
| k_Bacteria | p_Firmicutes   | c_Clostridia    | o_Clostridiales   | f_Lachnospiraceae   | Unclassified    | Unclassified | 0    | 0    | 0    | 0    | 0    | 0    | 0    | 0    | 0    | 0    | 0   | 0    | 0    | 6    | 0    | 0   | 0   | 0   | 0   |
| k_Bacteria | p_Firmicutes   | c_Clostridia    | o_Clostridiales   | f_[Tissierellaceae] | g_Anaerococcus  | Unclassified | 0    | 0    | 0    | 0    | 0    | 0    | 0    | 0    | 0    | 0    | 0   | 0    | 0    | 2    | 0    | 0   | 0   | 0   | 0   |
| k_Bacteria | p_Firmicutes   | c_Clostridia    | o_Clostridiales   | f_Eubacteriaceae    | g_Anaerofustis  | Unclassified | 0    | 0    | 0    | 0    | 0    | 0    | 0    | 0    | 0    | 0    | 0   | 0    | 0    | 1    | 0    | 0   | 1   | 0   | 0   |
| k_Bacteria | p_Firmicutes   | c_Bacilli       | o_Lactobacillales | f_Lactobacillaceae  | g_Lactobacillus | Unclassified | 0    | 0    | 0    | 0    | 0    | 0    | 0    | 0    | 0    | 0    | 0   | 0    | 0    | 3    | 0    | 0   | 0   | 0   | 1   |
| k_Bacteria | p_Firmicutes   | c_Bacilli       | o_Lactobacillales | f_Lactobacillaceae  | g_Lactobacillus | Unclassified | 0    | 0    | 0    | 0    | 0    | 0    | 0    | 0    | 0    | 0    | 0   | 0    | 0    | 2    | 0    | 0   | 1   | 0   | 0   |



| Level_1    | Level_2         | Level_3       | Level_4         | Level_5                | Level_6           | Level_7      | ss10 | sn15 | sn16 | ss19 | sn20 | ss21 | ss25 | sn26 | sn27 | ss28 | ss2 | ss30 | sn31 | sn35 | sn36 | sn5 | ss6 | ss8 | sn9 |
|------------|-----------------|---------------|-----------------|------------------------|-------------------|--------------|------|------|------|------|------|------|------|------|------|------|-----|------|------|------|------|-----|-----|-----|-----|
| k_Bacteria | p_Tenerificutes | c_Mollicutes  | o_RF39          | Unclassified           | Unclassified      | Unclassified | 0    | 0    | 0    | 0    | 0    | 0    | 0    | 0    | 0    | 0    | 0   | 0    | 0    | 0    | 3    | 0   | 0   | 0   | 0   |
| k_Bacteria | Unclassified    | Unclassified  | Unclassified    | Unclassified           | Unclassified      | Unclassified | 0    | 0    | 0    | 0    | 0    | 0    | 0    | 0    | 0    | 0    | 0   | 0    | 0    | 0    | 5    | 0   | 0   | 0   | 0   |
| k_Bacteria | p_Firmicutes    | c_Clostridia  | o_Clostridiales | f_Ruminococaceae       | Unclassified      | Unclassified | 0    | 0    | 0    | 0    | 0    | 0    | 0    | 0    | 0    | 0    | 0   | 0    | 0    | 0    | 51   | 0   | 0   | 0   | 0   |
| k_Bacteria | p_Bacteroidetes | c_Bacteroidia | o_Bacteroidales | f_Porphyromonadaceae   | g_Parabacteroides | Unclassified | 0    | 0    | 0    | 0    | 0    | 0    | 0    | 0    | 0    | 0    | 0   | 0    | 0    | 0    | 2    | 0   | 0   | 0   | 0   |
| k_Bacteria | p_Firmicutes    | c_Clostridia  | o_Clostridiales | f_Lachnospiraceae      | Unclassified      | Unclassified | 0    | 0    | 0    | 0    | 0    | 0    | 0    | 0    | 0    | 0    | 0   | 0    | 0    | 0    | 6    | 0   | 0   | 0   | 0   |
| k_Bacteria | Unclassified    | Unclassified  | Unclassified    | Unclassified           | Unclassified      | Unclassified | 0    | 0    | 0    | 0    | 0    | 0    | 0    | 0    | 0    | 0    | 0   | 0    | 0    | 0    | 7    | 0   | 0   | 0   | 0   |
| k_Bacteria | p_Firmicutes    | c_Clostridia  | o_Clostridiales | f_Peptostreptococaceae | Unclassified      | Unclassified | 0    | 0    | 0    | 0    | 0    | 0    | 0    | 0    | 0    | 0    | 0   | 0    | 0    | 0    | 1    | 0   | 1   | 2   | 0   |
| k_Bacteria | p_Firmicutes    | c_Clostridia  | o_Clostridiales | Unclassified           | Unclassified      | Unclassified | 0    | 0    | 0    | 0    | 0    | 0    | 0    | 0    | 0    | 0    | 0   | 0    | 0    | 0    | 3    | 0   | 0   | 1   | 0   |
| k_Bacteria | Unclassified    | Unclassified  | Unclassified    | Unclassified           | Unclassified      | Unclassified | 0    | 0    | 0    | 0    | 0    | 0    | 0    | 0    | 0    | 0    | 0   | 0    | 0    | 0    | 2    | 0   | 1   | 0   | 0   |
| k_Bacteria | p_Tenerificutes | c_Mollicutes  | o_RF39          | Unclassified           | Unclassified      | Unclassified | 0    | 0    | 0    | 0    | 0    | 0    | 0    | 0    | 0    | 0    | 0   | 0    | 0    | 0    | 1    | 0   | 3   | 2   | 0   |
| k_Bacteria | p_Firmicutes    | c_Clostridia  | o_Clostridiales | Unclassified           | Unclassified      | Unclassified | 0    | 0    | 0    | 0    | 0    | 0    | 0    | 0    | 0    | 0    | 0   | 0    | 0    | 0    | 1    | 1   | 1   | 4   | 0   |
| k_Bacteria | p_Firmicutes    | c_Clostridia  | o_Clostridiales | f_Ruminococaceae       | g_Ruminococcus    | Unclassified | 0    | 0    | 0    | 0    | 0    | 0    | 0    | 0    | 0    | 0    | 0   | 0    | 0    | 0    | 0    | 86  | 0   | 0   | 0   |
| k_Bacteria | p_Firmicutes    | c_Clostridia  | o_Clostridiales | Unclassified           | Unclassified      | Unclassified | 0    | 0    | 0    | 0    | 0    | 0    | 0    | 0    | 0    | 0    | 0   | 0    | 0    | 0    | 0    | 2   | 0   | 0   | 0   |
| k_Bacteria | Unclassified    | Unclassified  | Unclassified    | Unclassified           | Unclassified      | Unclassified | 0    | 0    | 0    | 0    | 0    | 0    | 0    | 0    | 0    | 0    | 0   | 0    | 0    | 0    | 0    | 1   | 0   | 3   | 4   |

| Level_1    | Level_2          | Level_3           | Level_4              | Level_5                 | Level_6              | Level_7      | ss10 | sn15 | sn16 | ss19 | sn20 | ss21 | ss25 | sn26 | sn27 | ss28 | ss2 | ss30 | sn31 | sn35 | sn36 | sn5 | ss6 | ss8  | sn9 |
|------------|------------------|-------------------|----------------------|-------------------------|----------------------|--------------|------|------|------|------|------|------|------|------|------|------|-----|------|------|------|------|-----|-----|------|-----|
| k_Bacteria | p_Bacteroidetes  | c_Bacteroidia     | o_Bacteroidales      | f_[Paraprevotellaceae]  | g_CF231              | Unclassified | 0    | 0    | 0    | 0    | 0    | 0    | 0    | 0    | 0    | 0    | 0   | 0    | 0    | 0    | 0    | 1   | 2   | 0    | 0   |
| k_Bacteria | p_Firmicutes     | c_Clostridia      | o_Clostridiales      | f_Peptostreptococcaceae | g_Peptostreptococcus | s_anaerobius | 0    | 0    | 0    | 0    | 0    | 0    | 0    | 0    | 0    | 0    | 0   | 0    | 0    | 0    | 0    | 0   | 2   | 0    | 0   |
| k_Bacteria | p_Firmicutes     | c_Erysipelotrichi | o_Erysipelotrichales | f_Erysipelotrichaceae   | Unclassified         | Unclassified | 0    | 0    | 0    | 0    | 0    | 0    | 0    | 0    | 0    | 0    | 0   | 0    | 0    | 0    | 0    | 0   | 5   | 2    | 0   |
| k_Bacteria | Unclassified     | Unclassified      | Unclassified         | Unclassified            | Unclassified         | Unclassified | 0    | 0    | 0    | 0    | 0    | 0    | 0    | 0    | 0    | 0    | 0   | 0    | 0    | 0    | 0    | 0   | 24  | 18   | 2   |
| k_Bacteria | p_Firmicutes     | c_Clostridia      | o_Clostridiales      | Unclassified            | Unclassified         | Unclassified | 0    | 0    | 0    | 0    | 0    | 0    | 0    | 0    | 0    | 0    | 0   | 0    | 0    | 0    | 0    | 0   | 19  | 3    | 0   |
| k_Bacteria | p_Firmicutes     | c_Clostridia      | o_Clostridiales      | f_Clostridiaceae        | g_Clostridium        | Unclassified | 0    | 0    | 0    | 0    | 0    | 0    | 0    | 0    | 0    | 0    | 0   | 0    | 0    | 0    | 0    | 0   | 2   | 0    | 0   |
| k_Bacteria | p_Actinobacteria | c_Coriobacteriia  | o_Coriobacteriales   | f_Coriobacteriaceae     | g_Adlercreutzia      | Unclassified | 0    | 0    | 0    | 0    | 0    | 0    | 0    | 0    | 0    | 0    | 0   | 0    | 0    | 0    | 0    | 0   | 2   | 0    | 0   |
| k_Bacteria | p_Bacteroidetes  | c_Bacteroidia     | o_Bacteroidales      | f_S24-7                 | Unclassified         | Unclassified | 0    | 0    | 0    | 0    | 0    | 0    | 0    | 0    | 0    | 0    | 0   | 0    | 0    | 0    | 0    | 0   | 2   | 0    | 0   |
| k_Bacteria | p_Firmicutes     | c_Clostridia      | o_Clostridiales      | f_Lachnospiraceae       | Unclassified         | Unclassified | 0    | 0    | 0    | 0    | 0    | 0    | 0    | 0    | 0    | 0    | 0   | 0    | 0    | 0    | 0    | 0   | 3   | 0    | 0   |
| k_Bacteria | p_Firmicutes     | c_Clostridia      | o_Clostridiales      | Unclassified            | Unclassified         | Unclassified | 0    | 0    | 0    | 0    | 0    | 0    | 0    | 0    | 0    | 0    | 0   | 0    | 0    | 0    | 0    | 0   | 2   | 6    | 0   |
| k_Bacteria | p_Bacteroidetes  | c_Bacteroidia     | o_Bacteroidales      | f_S24-7                 | Unclassified         | Unclassified | 0    | 0    | 0    | 0    | 0    | 0    | 0    | 0    | 0    | 0    | 0   | 0    | 0    | 0    | 0    | 0   | 0   | 1484 | 0   |
| k_Bacteria | p_Bacteroidetes  | c_Bacteroidia     | o_Bacteroidales      | f_Prevotellaceae        | g_Prevotella         | Unclassified | 0    | 0    | 0    | 0    | 0    | 0    | 0    | 0    | 0    | 0    | 0   | 0    | 0    | 0    | 0    | 0   | 0   | 169  | 2   |
| k_Bacteria | p_Cyanobacteria  | c_4C0d-2          | o_YS2                | Unclassified            | Unclassified         | Unclassified | 0    | 0    | 0    | 0    | 0    | 0    | 0    | 0    | 0    | 0    | 0   | 0    | 0    | 0    | 0    | 0   | 0   | 36   | 0   |
| k_Bacteria | p_Firmicutes     | c_Clostridia      | o_Clostridiales      | f_Lachnospiraceae       | Unclassified         | Unclassified | 0    | 0    | 0    | 0    | 0    | 0    | 0    | 0    | 0    | 0    | 0   | 0    | 0    | 0    | 0    | 0   | 0   | 23   | 0   |

| Level_1    | Level_2          | Level_3               | Level_4         | Level_5           | Level_6       | Level_7      | ss10 | sn15 | sn16 | ss19 | sn20 | ss21 | ss25 | sn26 | sn27 | ss28 | ss2 | ss30 | sn31 | sn35 | sn36 | sn5 | ss6 | ss8 | sn9 |
|------------|------------------|-----------------------|-----------------|-------------------|---------------|--------------|------|------|------|------|------|------|------|------|------|------|-----|------|------|------|------|-----|-----|-----|-----|
| k_Bacteria | p_Teneritales    | c_Mollicutes          | o_RF39          | Unclassified      | Unclassified  | Unclassified | 0    | 0    | 0    | 0    | 0    | 0    | 0    | 0    | 0    | 0    | 0   | 0    | 0    | 0    | 0    | 0   | 0   | 8   | 0   |
| k_Bacteria | p_Bacteroidetes  | c_Bacteroidia         | o_Bacteroidales | f_Prevotellaceae  | g_Prevotellae | Unclassified | 0    | 0    | 0    | 0    | 0    | 0    | 0    | 0    | 0    | 0    | 0   | 0    | 0    | 0    | 0    | 0   | 0   | 21  | 28  |
| k_Bacteria | p_Bacteroidetes  | c_Bacteroidia         | o_Bacteroidales | f_Rikenellaceae   | Unclassified  | Unclassified | 0    | 0    | 0    | 0    | 0    | 0    | 0    | 0    | 0    | 0    | 0   | 0    | 0    | 0    | 0    | 0   | 0   | 22  | 0   |
| k_Bacteria | p_Firmicutes     | Unclassified          | Unclassified    | Unclassified      | Unclassified  | Unclassified | 0    | 0    | 0    | 0    | 0    | 0    | 0    | 0    | 0    | 0    | 0   | 0    | 0    | 0    | 0    | 0   | 0   | 19  | 0   |
| k_Bacteria | p_Firmicutes     | c_Clostridia          | o_Clostridiales | f_Ruminococaceae  | Unclassified  | Unclassified | 0    | 0    | 0    | 0    | 0    | 0    | 0    | 0    | 0    | 0    | 0   | 0    | 0    | 0    | 0    | 0   | 0   | 22  | 0   |
| k_Bacteria | p_Firmicutes     | c_Clostridia          | o_Clostridiales | Unclassified      | Unclassified  | Unclassified | 0    | 0    | 0    | 0    | 0    | 0    | 0    | 0    | 0    | 0    | 0   | 0    | 0    | 0    | 0    | 0   | 0   | 13  | 0   |
| k_Bacteria | Unclassified     | Unclassified          | Unclassified    | Unclassified      | Unclassified  | Unclassified | 0    | 0    | 0    | 0    | 0    | 0    | 0    | 0    | 0    | 0    | 0   | 0    | 0    | 0    | 0    | 0   | 0   | 6   | 0   |
| k_Bacteria | p_Firmicutes     | c_Clostridia          | o_Clostridiales | Unclassified      | Unclassified  | Unclassified | 0    | 0    | 0    | 0    | 0    | 0    | 0    | 0    | 0    | 0    | 0   | 0    | 0    | 0    | 0    | 0   | 0   | 2   | 7   |
| k_Bacteria | p_Firmicutes     | c_Clostridia          | o_Clostridiales | Unclassified      | Unclassified  | Unclassified | 0    | 0    | 0    | 0    | 0    | 0    | 0    | 0    | 0    | 0    | 0   | 0    | 0    | 0    | 0    | 0   | 0   | 17  | 0   |
| k_Bacteria | p_Firmicutes     | c_Clostridia          | o_Clostridiales | f_Lachnospiraceae | Unclassified  | Unclassified | 0    | 0    | 0    | 0    | 0    | 0    | 0    | 0    | 0    | 0    | 0   | 0    | 0    | 0    | 0    | 0   | 0   | 2   | 3   |
| k_Bacteria | Unclassified     | Unclassified          | Unclassified    | Unclassified      | Unclassified  | Unclassified | 0    | 0    | 0    | 0    | 0    | 0    | 0    | 0    | 0    | 0    | 0   | 0    | 0    | 0    | 0    | 0   | 0   | 2   | 0   |
| k_Bacteria | p_Bacteroidetes  | c_Bacteroidia         | o_Bacteroidales | Unclassified      | Unclassified  | Unclassified | 0    | 0    | 0    | 0    | 0    | 0    | 0    | 0    | 0    | 0    | 0   | 0    | 0    | 0    | 0    | 0   | 0   | 2   | 0   |
| k_Bacteria | p_Proteobacteria | c_Alphaproteobacteria | o_RF32          | Unclassified      | Unclassified  | Unclassified | 0    | 0    | 0    | 0    | 0    | 0    | 0    | 0    | 0    | 0    | 0   | 0    | 0    | 0    | 0    | 0   | 0   | 0   | 38  |
| k_Bacteria | p_Firmicutes     | c_Clostridia          | o_Clostridiales | Unclassified      | Unclassified  | Unclassified | 0    | 0    | 0    | 0    | 0    | 0    | 0    | 0    | 0    | 0    | 0   | 0    | 0    | 0    | 0    | 0   | 0   | 0   | 9   |

| Level_1    | Level_2      | Level_3      | Level_4         | Level_5           | Level_6        | Level_7      | ss10 | sn15 | sn16 | ss19 | sn20 | ss21 | ss25 | sn26 | sn27 | ss28 | ss2 | ss30 | sn31 | sn35 | sn36 | sn5 | ss6 | ss8 | sn9 |
|------------|--------------|--------------|-----------------|-------------------|----------------|--------------|------|------|------|------|------|------|------|------|------|------|-----|------|------|------|------|-----|-----|-----|-----|
| k_Bacteria | p_Firmicutes | c_Clostridia | o_Clostridiales | f_Lachnospiraceae | g_Coproccoccus | Unclassified | 0    | 0    | 0    | 0    | 0    | 0    | 0    | 0    | 0    | 0    | 0   | 0    | 0    | 0    | 0    | 0   | 0   | 0   | 8   |
| k_Bacteria | p_Firmicutes | c_Clostridia | o_Clostridiales | Unclassified      | Unclassified   | Unclassified | 0    | 0    | 0    | 0    | 0    | 0    | 0    | 0    | 0    | 0    | 0   | 0    | 0    | 0    | 0    | 0   | 0   | 0   | 5   |
| k_Bacteria | Unclassified | Unclassified | Unclassified    | Unclassified      | Unclassified   | Unclassified | 0    | 0    | 0    | 0    | 0    | 0    | 0    | 0    | 0    | 0    | 0   | 0    | 0    | 0    | 0    | 0   | 0   | 0   | 5   |
| k_Bacteria | p_Firmicutes | c_Clostridia | o_Clostridiales | Unclassified      | Unclassified   | Unclassified | 0    | 0    | 0    | 0    | 0    | 0    | 0    | 0    | 0    | 0    | 0   | 0    | 0    | 0    | 0    | 0   | 0   | 0   | 4   |
| k_Bacteria | p_Firmicutes | c_Clostridia | o_Clostridiales | Unclassified      | Unclassified   | Unclassified | 0    | 0    | 0    | 0    | 0    | 0    | 0    | 0    | 0    | 0    | 0   | 0    | 0    | 0    | 0    | 0   | 0   | 0   | 3   |
